# Supplementary material for: Control of the diastereoselectivity at C(20) in the formation of C(21)-fluorinated thevinols
Source: Royal Society of Chemistry journal article supplement (doi:10.1039/d2ob02144g), 2023-01-01
Supplement: d2ob02144g1.pdf [file d2ob02144g1.pdf]

## Supporting Information

### Control of C(20)-diastereoselectivity in the formation of C(21)-fluorinated thevinols

Irina V. Sandulenko <sup>a</sup>, Ekaterina S. Kovaleva <sup>b</sup>, Maria V. Zelentsova <sup>a</sup>, Asmik A. Ambartsumyan <sup>a</sup>, Sergey N. Gorlov <sup>c</sup>, A. A. Danshina <sup>a,d</sup>, Rinat R. Aysin <sup>a,d</sup>, Sergey K. Moiseev <sup>a,\*</sup>

<sup>a</sup> *A. N. Nesmeyanov Institute of Organoelement Compounds, Russian Academy of Sciences, build. 1, ul. Vavilova 28, Moscow 119334, Russia*

<sup>b</sup> *D. I. Mendeleev University of Chemical Technology of Russia, Miusskaya Sq., 9, Moscow 125047, Russia*

<sup>c</sup> *Faculty of the Fundamental Physical and Chemical Engineering, Lomonosov Moscow State University, Leninskiye Gory 1-51, Moscow 119991, Russia*

<sup>d</sup> *Moscow Institute of Physics and Technology (National Research University), Institutskiy per., 9, Dolgoprudny, 3, Moscow, Russia*

#### Content

|                                                                                                                |     |
|----------------------------------------------------------------------------------------------------------------|-----|
| 1. General.....                                                                                                | S2  |
| 2. Experimental Section and Spectra Data.....                                                                  | S3  |
| 3. Quantum chemical calculation details.....                                                                   | S12 |
| 4. Crystal structure data.....                                                                                 | S27 |
| 4.1. General.....                                                                                              | S27 |
| 4.2. Crystal structure data for compounds <b>11c</b> , <b>15b</b> , <b>16b</b> , <b>17a</b> , <b>18b</b> ..... | S27 |
| 5. NMR spectra.....                                                                                            | S31 |
| 6. References.....                                                                                             | S43 |

## 1. General

All reactions were performed in an argon atmosphere in dried glassware. All solvents were purified (dried and distilled) before use according to literature methods. All reagents were used as supplied by commercial sources unless otherwise stated. Thevinone (**2**) was obtained from thebaine (**1**) and methyl vinyl ketone according to the method [1], 21,21,21-trifluorothevinone (**9**) was obtained from aldehyde **10** according to the method [2], 21-methylthevinone (**19**) was obtained from thebaine (**1**) according to the method [3]

NMR spectra ( $^1\text{H}$ ,  $^{13}\text{C}$ ,  $^{19}\text{F}$ ) were recorded using Bruker Avance<sup>TM</sup> 400 spectrometer (400 MHz for  $^1\text{H}$ , 376.5 MHz for  $^{19}\text{F}$ ) or Bruker Avance<sup>TM</sup> 600 spectrometer (600.22 MHz for  $^1\text{H}$  and 150.93 MHz for  $^{13}\text{C}$ ) in  $\text{CDCl}_3$ . Some  $^1\text{H}$ ,  $^{19}\text{F}$  NMR spectra were recorded using Bruker Avance<sup>TM</sup> 300 spectrometer (300 MHz for  $^1\text{H}$ , 282 MHz for  $^{19}\text{F}$ ).  $^{19}\text{F}$  chemical shifts were measured relative to  $\text{CFCl}_3$  as an external standard. Multiplicities are abbreviated as follows: s = singlet, d = doublet, dd = doublet of doublets, t = triplet, q = quartet, m = multiplet, br = broad; coupling constants,  $J$ , are reported in Hz. HRMS were recorded on a Bruker maXis instrument using electrospray ionization. Microanalyses (C, H, N, F) were performed using the Carlo-Erba CE-1106. Melting points were determined with an Electrothermal 1002 MELTEMP<sup>®</sup> capillary melting point apparatus and are uncorrected. TLC was performed with precoated TLC sheets of silica gel 60 F254 (Merck<sup>®</sup>) and visualized by UV and iodine. Column liquid chromatography was performed using silica gel (particle size no more than 80  $\mu\text{m}$ ).

## 2. Experimental Section and Spectra Data

### 2.1 Reactions of MeMgI with **9**. General procedure (Table 3).

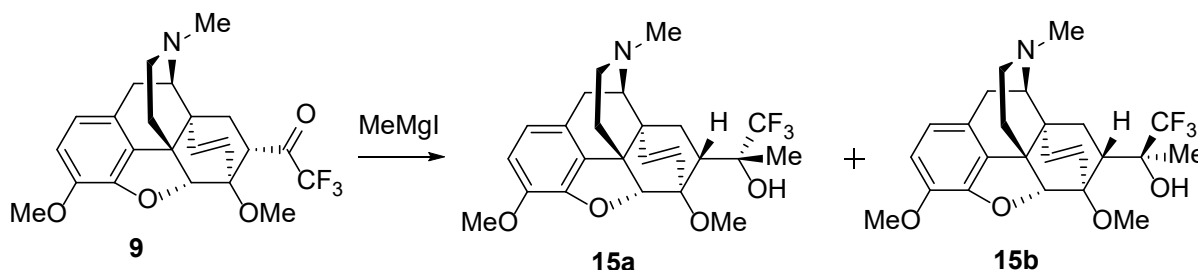

An appropriate salt, if any (Table 3, entries 1-14, section 1.2.1.1 of the main text of the article), THF (if necessary) and ketone **9** (0.50 mmol) were added subsequently to a freshly prepared solution of MeMgI (1.05 mmol) in ether. The reaction mixture was stirred for an appropriate time and temperature (see Table 3). If necessary, it was allowed to warm to the room temperature, quenched with NH<sub>4</sub>Cl (saturated aqueous solution), and extracted with ether, and the resulting layer was washed with water twice. The resulting ether solution was dried over anhydrous Na<sub>2</sub>SO<sub>4</sub> and the solvent was removed *in vacuo*. The residue contains a mixture of isomers **15a** and **15b** in various ratios, which was determined by NMR (see Table 3, entries 1-14).

### 2.2 Reactions of RMgX or RLi (R = Bu<sup>i</sup>, Bu<sup>n</sup>, Pr<sup>n</sup>, Pr<sup>i</sup>, Et) with **9**.

General procedure (Table 4).

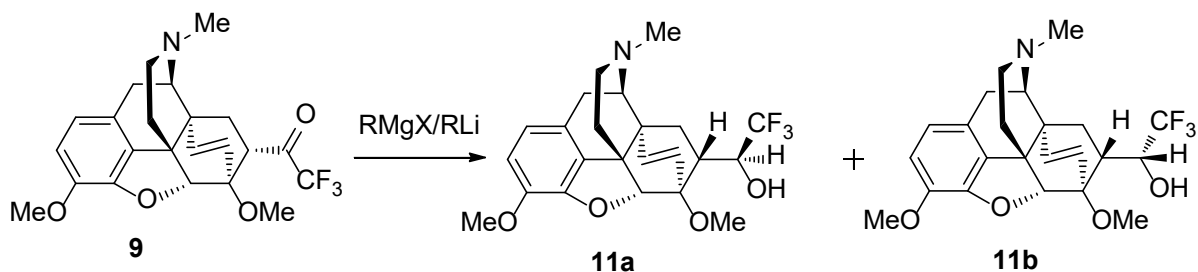

An appropriate salt, if any (Table 4, section 1.2.1.2 of the main text of the article) and ketone **9** (1 eq. in ether or THF) were added subsequently to a freshly prepared solution of RMgX or RLi<sup>1</sup>. The reaction mixture was stirred for an appropriate time and temperature (see Table 4), quenched with NH<sub>4</sub>Cl (saturated aqueous solution), and extracted with ether or CHCl<sub>3</sub>, and the resulting layer was washed with water twice. The resulting ether solution was dried over anhydrous Na<sub>2</sub>SO<sub>4</sub> and the solvent was removed *in vacuo*. The residue contains a mixture of isomers **11a** and **11b** in various ratios, which was determined by NMR (see Table 4).

<sup>1</sup> 2.0 eq. of Bu<sup>i</sup>MgCl in ether (Table 4, entries 1-3), 1.15 eq. of Bu<sup>n</sup>MgBr in THF (Table 4, entry 4), 2.0 eq. of Pr<sup>n</sup>MgBr in THF (Table 4, entries 5-6), 1.74 eq. of Pr<sup>n</sup>MgBr in ether (Table 4, entry 7), 1.15 eq. of EtMgBr in THF (Table 4, entry 8), 1.3 eq. of Bu<sup>i</sup>Li in pentane (Table 4, entries 9-11), 1.1-2.0 eq. of Pr<sup>i</sup>Li in pentane (Table 4, entries 12-14).

### 2.2.1 Synthesis of 11a,b by the reaction of 9 with Pr<sup>n</sup>MgBr (Table 4, entry 7).

Pr<sup>n</sup>Br (0.2 ml) was added dropwise to the mixture of ether (15 ml) and Mg (shavings, 0.14 g, 6.0 mmol) until complete dissolution of magnesium. The reaction mixture was allowed to warm to the room temperature and a solution of **9** (1.50 g, 3.45 mmol) in ether (5 ml) was added dropwise over 20 min. The reaction mixture was stirred for 20 min, quenched with NH<sub>4</sub>Cl (saturated aqueous solution) and water. The resulted mixture was extracted with ether and the organic layer was washed with water twice. The resulting ether solution was dried over anhydrous Na<sub>2</sub>SO<sub>4</sub> and the solvent was removed *in vacuo*. The residue contained a mixture of isomers **11a** and **11b** in 5:2 ratio. The products were separated by column chromatography on silica gel (CHCl<sub>3</sub> : hexane : MeOH : NH<sub>4</sub>OH = 1600:1600:15:1) affording 0.83 g of **11a** (55%) and 0.09 g of **11b** (6%) as colorless oils.

(5R,6R,7R,20S)-4,5-Epoxy-7-(1-hydroxy-2,2,2-trifluoroethyl)-3,6-dimethoxy-17-methyl-6,14-ethenoisomorphinan (**11a**):

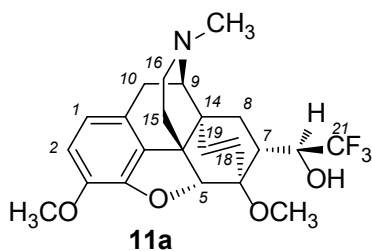

**<sup>1</sup>H NMR** (600 MHz, CDCl<sub>3</sub>): δ 1.04 (dd, 1H, H-8 $\alpha$ ), 1.83 (m, 1H, H-15<sub>eq</sub>), 2.00 (ddd, <sup>2</sup>J = 12.8 Hz, <sup>3</sup>J = 12.8 Hz, <sup>3</sup>J = 5.6 Hz, 1H, H-15<sub>ax</sub>), 2.15 (ddd, <sup>3</sup>J = 9.0 Hz, <sup>3</sup>J = 5.4 Hz, 1H, H-7 $\beta$ ), 2.35 (s, 3H, NCH<sub>3</sub>), 2.34-2.42 (m, 2H, H-10 $\alpha$  + H-16<sub>ax</sub>), 2.52 (m, 1H, H-16<sub>eq</sub>), 2.89 (dd, <sup>2</sup>J = 13.7 Hz, <sup>3</sup>J = 9.0 Hz, 1H, H-8 $\beta$ ), 3.14 (d, <sup>3</sup>J = 6.5 Hz, 1H, H-9), 3.21 (d, <sup>2</sup>J = 18.5 Hz, 1H, H-10 $\beta$ ), 3.76 (s, 3H, 6-OCH<sub>3</sub>), 3.76 (m, <sup>3</sup>J<sub>H-20,F-21</sub> = 6.7 Hz, 1H, H-20), 3.81 (s, 3H, 3-OCH<sub>3</sub>), 4.57 (d, <sup>4</sup>J<sub>H-5,H-18</sub> = 0.9 Hz, 1H, H-5), 5.59 (d, <sup>3</sup>J = 8.9 Hz, 1H, H-19), 5.94 (s, 1H, OH), 5.95 (br d, 1H, H-18), 6.54 (br) + 6.62 (AB-system, J<sub>AB</sub> = 8.1 Hz, 2H, H-1 + H-2); **<sup>13</sup>C NMR** (151 MHz, CDCl<sub>3</sub>): δ 22.31, 28.56, 33.03, 37.93, 42.36, 43.51, 45.38, 46.19, 54.95, 56.74, 59.90, 73.90 (q, <sup>2</sup>J<sub>C,F</sub> = 28.5 Hz, CH-CF<sub>3</sub>), 83.61, 96.63, 113.80, 119.74, 123.83, 125.12 (q, <sup>1</sup>J<sub>C,F</sub> = 283.0 Hz, CF<sub>3</sub>), 128.12, 134.15, 138.10, 141.99, 147.58; **<sup>19</sup>F NMR** (282 MHz, CDCl<sub>3</sub>): δ -74.67 (d, <sup>3</sup>J<sub>F,H</sub> = 8.0 Hz, CF<sub>3</sub>); **HRMS (ESI):** *m/z* calcd. for C<sub>23</sub>H<sub>27</sub>F<sub>3</sub>NO<sub>4</sub>: 438.1887 (M+H)<sup>+</sup>, found: 438.1892.

(5R,6R,7R,20R)-4,5-Epoxy-7-(1-hydroxy-2,2,2-trifluoroethyl)-3,6-dimethoxy-17-methyl-6,14-ethenoisomorphinan (**11b**):

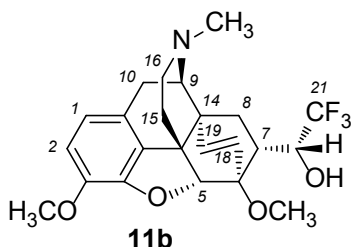

**<sup>1</sup>H NMR** (600 MHz, CDCl<sub>3</sub>): δ 1.50 (dd, <sup>2</sup>J = 13.5 Hz, <sup>3</sup>J = 6.7 Hz, 1H, H-8 $\alpha$ ), 1.86 (m, 1H, H-15<sub>eq</sub>), 2.00-2.07 (m, 1H, H-15<sub>ax</sub>), 2.21

(dd,  $^3J = 9.6$  Hz,  $^3J = 6.5$  Hz, 1H, H-7 $\beta$ ), 2.40 (s, 3H, NCH<sub>3</sub>), 2.35-2.46 (m, 2H, H-10 $\alpha$  + H-16 $\alpha_x$ ), 2.57 (m, 1H, H-16 $_{eq}$ ), 2.86 (dd,  $^2J = 13.5$  Hz,  $^3J = 9.6$  Hz, 1H, H-8 $\beta$ ), 3.22 (d,  $^3J = 6.0$  Hz, 1H, H-9), 3.22 (d,  $^2J = 18.5$  Hz, 1H, H-10 $\beta$ ), 3.60 (s, 3H, 6-OCH<sub>3</sub>), 3.82 (s, 3H, 3-OCH<sub>3</sub>), 4.47 (q,  $^3J_{H-20,H-7\beta} < 1.0$  Hz;  $^3J_{H-20,F-21} = 8.0$  Hz, 1H, H-20), 4.57 (d,  $^4J_{H-5,H-18} = 1.1$  Hz, 1H, H-5), 5.50 (d,  $^3J = 8.7$  Hz, 1H, H-19), 5.83 (br d,  $^3J = 8.7$  Hz, 1H, H-18), 6.54 (br) + 6.62 (AB-system,  $J_{AB} = 8.1$  Hz, 2H, H-1 + H-2);  $^{13}\text{C NMR}$  (151 MHz, CDCl<sub>3</sub>):  $\delta$  22.71, 29.38, 31.94, 36.43, 42.93, 43.51, 45.54, 47.21, 52.73, 56.56, 60.07, 67.25 (q,  $^2J_{C,F} = 29.8$  Hz,  $\underline{\text{C}}\text{H-CF}_3$ ), 79.15, 94.47, 113.40, 119.54, 126.72, 127.08 (q,  $^1J_{C,F} = 273.9$  Hz,  $\underline{\text{C}}\text{F}_3$ ), 128.35, 133.88, 136.73, 141.93, 148.02;  $^{19}\text{F NMR}$  (282 MHz, CDCl<sub>3</sub>):  $\delta$  -76.48 (d,  $^3J_{F,H} = 8.0$  Hz, CF<sub>3</sub>); **HRMS (ESI):**  $m/z$  calcd. for C<sub>23</sub>H<sub>27</sub>F<sub>3</sub>NO<sub>4</sub> 438.1887 (M+H)<sup>+</sup>, found: 438.1895.

### 2.2.2 (5*R*,6*R*,7*R*,20*S*)-17-Cyano-4,5-epoxy-7-(1-hydroxy-2,2,2-trifluoroethyl)-3,6-dimethoxy-6,14-ethenoisomorphinan (**11c**).

A solution of cyanogen bromide (1.37 ml, 0.8 M in CHCl<sub>3</sub>) was added to **11a** (0.12 g, 0.27 mmol) and the resulted solution was allowed to stay at room temperature for 24 h. The reaction mixture was washed with diluted HCl and water, dried over anhydrous Na<sub>2</sub>SO<sub>4</sub> and the solvent was removed *in vacuo*. A crystallization of the residue from methanol delivered 0.030 g of **11c** (25%) as colorless crystals suitable for X-ray study.

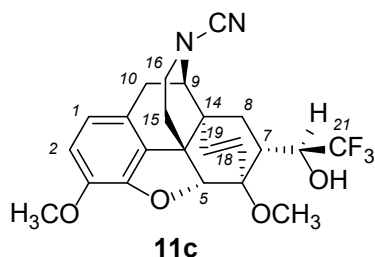

**MP:** 228-230°C.  $^1\text{H NMR}$  (300 MHz, CDCl<sub>3</sub>):  $\delta$  1.24 (m, 1H, H-8 $\alpha$ ), 1.93 (m, 1H, H-15 $_{eq}$ ), 2.10 (m, 1H, H-15 $_{ax}$ ), 2.20 (m, 1H, H-7 $\beta$ ), 2.68 (dd,  $^2J = 13.5$  Hz,  $^3J = 8.9$  Hz, 1H, H-8 $\beta$ ), 3.11 (dd,  $^2J = 19.2$  Hz,  $^3J = 6.4$  Hz, 1H, H-10 $\alpha$ ), 3.29 (d,  $^2J = 19.2$  Hz, 1H, H-10 $\beta$ ), 3.37 (m, 2H, 2H-16), 3.79 (s, 3H, 6-OCH<sub>3</sub>), 3.83 (s, 3H, 3-OCH<sub>3</sub>), 3.80 (m, 1H, H-20), 3.89 (d,  $^3J = 6.4$  Hz, 1H, H-9), 4.59 (br d, 1H, H-5), 5.56 (d,  $^3J = 9.0$  Hz, 1H, H-19), 5.75 (s, 1H, OH), 6.07 (br d, 1H, H-18), 6.61 (br) + 6.70 (AB-system,  $J_{AB} = 8.2$  Hz, 2H, H-1 + H-2);  $^{13}\text{C NMR}$  (101 MHz, CDCl<sub>3</sub>)  $\delta$  28.31, 31.10, 31.71, 38.08, 41.14, 41.86, 45.66, 55.17, 56.64, 58.14, 73.43 (q,  $^2J_{C,F} = 28.8$  Hz,  $\underline{\text{C}}\text{H-CF}_3$ ), 83.07, 96.29, 114.56, 117.62, 120.31, 124.82 (q,  $^1J_{C,F} = 283.0$  Hz,  $\underline{\text{C}}\text{F}_3$ ), 125.25, 125.27, 131.99, 135.59, 142.62, 147.79;  $^{19}\text{F NMR}$  (282 MHz, CDCl<sub>3</sub>):  $\delta$  -74.56 (s, CF<sub>3</sub>); **HRMS (ESI)** calcd for C<sub>23</sub>H<sub>24</sub>F<sub>3</sub>N<sub>2</sub>O<sub>4</sub> [M + H]<sup>+</sup>: 449.1683, found: 449.1680.

### 2.3 Reactions of RLi with **9**. General procedure.

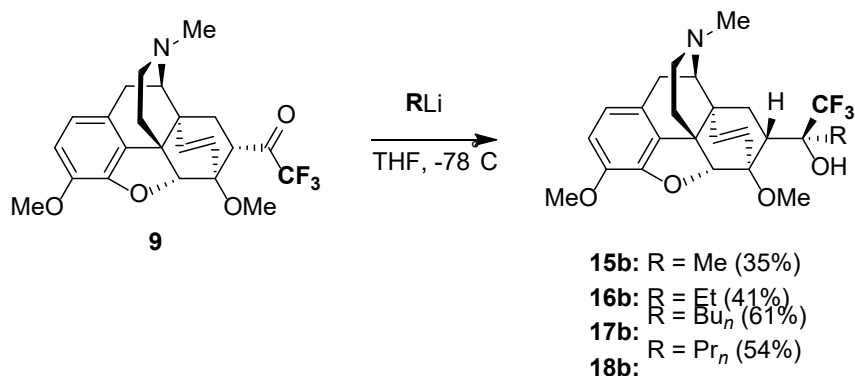

A solution of RLi was added dropwise to a solution of **9** in THF at  $-78\text{ }^{\circ}\text{C}$  and the mixture was stirred for 15 min at  $-78\text{ }^{\circ}\text{C}$ . The reaction mixture was allowed to warm to the room temperature, quenched with  $\text{NH}_4\text{Cl}$  (saturated aqueous solution), and extracted with  $\text{CHCl}_3$  twice. The combined organic layers were dried over  $\text{Na}_2\text{SO}_4$  and the solvent was removed *in vacuo* to afford **15b-18b** as colorless solids after crystallization from methanol.

(5*R*,6*R*,7*R*,20*S*)-4,5-Epoxy-7-(1-hydroxy-1-methyl-2,2,2-trifluoroethyl)-3,6-dimethoxy-17-methyl-6,14-ethenoisomorphinan (**15b**).

The reaction of ketone **9** (0.20 g, 0.46 mmol) with  $\text{MeLi}^2$  (0.60 ml, 0.95 M solution in ether) afforded 0.073 g of **15b** (35%).

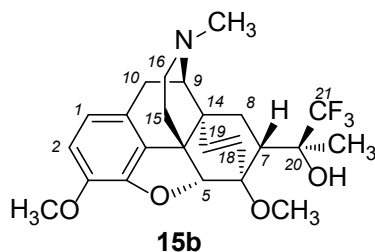

**MP**:  $196\text{-}198^{\circ}\text{C}$ .  **$^1\text{H NMR}$**  (300 MHz,  $\text{CDCl}_3$ ):  $\delta$  1.07 (dd,  $^2J = 13.2\text{ Hz}$ ,  $^3J = 8.9\text{ Hz}$ , 1H, H-8 $\alpha$ ), 1.19 (s, 3H,  $\text{CH}_3$ ), 1.81-1.88 (m, 1H, H-15<sub>eq</sub>), 1.96 (ddd,  $^2J = 12.5\text{ Hz}$ ,  $^3J = 5.6\text{ Hz}$ , 1H, H-15<sub>ax</sub>), 2.28 (dd,  $^3J = 8.9\text{ Hz}$ ,  $^3J = 9.2\text{ Hz}$ , 1H, H-7 $\beta$ ), 2.36 (s, 3H,  $\text{NCH}_3$ ), 2.32-2.41 (m, 2H, H-10<sub>a</sub> + H-16<sub>ax</sub>), 2.51 (dd,  $^2J = 12.1\text{ Hz}$ ,  $^3J = 5.4\text{ Hz}$ , 1H, H-16<sub>eq</sub>), 2.91 (dd,  $^2J = 13.2\text{ Hz}$ ,  $^3J = 9.2\text{ Hz}$ , 1H, H-8 $\beta$ ), 3.15 (d,  $^3J = 6.3\text{ Hz}$ , 1H, H-9), 3.23 (d,  $^2J = 18.6\text{ Hz}$ , 1H, H-10 $\beta$ ), 3.81 (s, 3H, 6- $\text{OCH}_3$ ), 3.82 (s, 3H, 3- $\text{OCH}_3$ ), 4.56 (br d, 1H, H-5), 5.53 (d,  $^3J = 8.9\text{ Hz}$ , 1H, H-19), 5.65 (s, 1H, OH), 5.97 (br d, 1H, H-18), 6.62+6.53 (AB-system,  $J_{\text{AB}} = 8.2\text{ Hz}$ , 2H, H-1+H-2);  **$^{13}\text{C NMR}$**  (101 MHz,  $\text{CDCl}_3$ )  $\delta$  18.46, 22.39, 29.33, 33.31, 42.79, 43.40, 45.36, 46.73, 55.56, 56.72, 59.79, 76.11 (q,  $^2J_{\text{C,F}} = 26.5\text{ Hz}$ ,  $\underline{\text{C}}\text{-CF}_3$ ), 83.29, 98.22, 113.86, 119.52, 123.92, 125.66 (q,  $^1J_{\text{C,F}} = 285.9\text{ Hz}$ ,  $\underline{\text{C}}\text{F}_3$ ), 128.01, 133.85, 136.63, 141.78, 147.80;  **$^{19}\text{F NMR}$**  (282 MHz,  $\text{CDCl}_3$ ):  $\delta$   $-79.54$  (s, 3F,  $\text{CF}_3$ ); **MS (ESI) ( $m/z$ )**: 452 [ $\text{M}+1$ ]<sup>+</sup>. Found (%): C 63.80, H 6.27, N 3.07, F 12.50;  $\text{C}_{24}\text{H}_{28}\text{F}_3\text{NO}_4$ . Calculated (%): C 63.85, H 6.25, N 3.10, F 12.62.

<sup>2</sup> To compare the stereochemical result, the reaction of **9** with MeLi was carried out under the same conditions at  $20^{\circ}\text{C}$ ,  $0^{\circ}\text{C}$ , and  $-78^{\circ}\text{C}$ . The ratio of products **15a:15b** was deduced from the NMR data. The results are shown in Table 3 (entries 15-17) of the main text of the article.

(5R,6R,7R,20S)-4,5-epoxy-3,6-dimethoxy-17-methyl-7-(1-hydroxy-1-(trifluoromethyl)propyl)-6,14-ethenoisomorphinan (16b):

The reaction of ketone **9** (0.10 g, 0.23 mmol) with EtLi (1.00 ml, 0.33M solution in hexane) afforded 0.043 g of **16b** (41%).

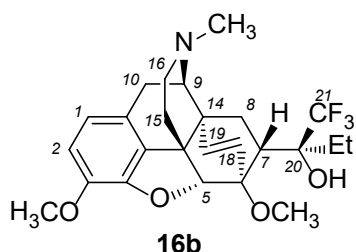

**MP:** 198-200°C. **<sup>1</sup>H NMR** (300 MHz, CDCl<sub>3</sub>): 0.97 (t, <sup>2</sup>J = 7.3 Hz, 3H, CH<sub>2</sub>CH<sub>3</sub>), 1.11 (dd, <sup>2</sup>J = 13.5 Hz, <sup>3</sup>J = 8.7 Hz, 1H, H-8<sub>α</sub>), 1.36-1.51 and 1.55-1.70 (m + m, 2H, CH<sub>2</sub>CH<sub>3</sub>), 1.84 (m, 1H, H-15<sub>eq</sub>), 1.97 (ddd, <sup>2</sup>J = 12.5 Hz, <sup>3</sup>J = 5.4 Hz, 1H, H-15<sub>ax</sub>), 2.31 (m, 1H, H-7<sub>β</sub>), 2.36 (s, 3H, NCH<sub>3</sub>), 2.31-2.44 (m, 2H, H-10<sub>α</sub> + H-16<sub>ax</sub>), 2.51 (dd, 1H, <sup>2</sup>J = 11.8 Hz, <sup>3</sup>J = 5.0 Hz, H-16<sub>eq</sub>), 2.91 (dd, <sup>2</sup>J = 13.5 Hz, <sup>3</sup>J = 9.4 Hz, 1H, H-8<sub>β</sub>), 3.13 (d, <sup>3</sup>J = 6.3 Hz, 1H, H-9), 3.22 (d, <sup>2</sup>J = 18.6 Hz, 1H, H-10<sub>β</sub>), 3.80 (s, 3H, 6-OCH<sub>3</sub>), 3.82 (s, 3H, 3-OCH<sub>3</sub>), 4.56 (br d, 1H, H-5), 5.25 (s, 1H, OH), 5.50 (d, <sup>3</sup>J = 8.9 Hz, 1H, H-19), 5.95 (br d, <sup>3</sup>J = 8.9 Hz, 1H, H-18), 6.63 + 6.53 (AB-system, J<sub>AB</sub> = 8.1 Hz, 2H, H-1 + H-2); **<sup>13</sup>C NMR** (101 MHz, CDCl<sub>3</sub>) δ 7.62, 22.25, 25.55, 29.17, 33.50, 42.86, 43.48, 43.85, 45.30, 46.87, 55.62, 56.73, 59.73, 78.25 (q, <sup>2</sup>J<sub>C,F</sub> = 25.2 Hz, C-CF<sub>3</sub>), 83.28, 98.56, 113.68, 119.44, 124.12, 125.63 (q, <sup>1</sup>J<sub>C,F</sub> = 288.5 Hz, CF<sub>3</sub>), 128.29, 134.04, 136.50, 141.69, 147.80; **<sup>19</sup>F NMR** (282 MHz, CDCl<sub>3</sub>): δ -73.69 (s, 3F, CF<sub>3</sub>); **HRMS (ESI)** calcd for C<sub>25</sub>H<sub>31</sub>F<sub>3</sub>NO<sub>4</sub> [M + H]<sup>+</sup>: 466.2205, found: 466.2208.

(5R,6R,7R,20S)-7-(1-Hydroxy-1-(trifluoromethyl)butyl)-4,5-epoxy-3,6-dimethoxy-17-methyl-6,14-ethenoisomorphinan (18b):

The reaction of ketone **9** (1.00 g, 2.30 mmol) with *n*-PrLi (9.00 ml, 0.34M solution in hexane) afforded 0.60 g of **18b** (54%).

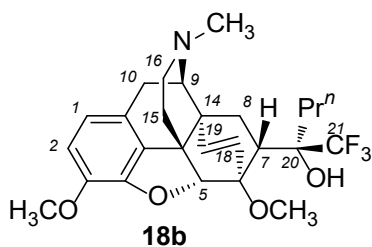

**MP:** 193-196°C. **<sup>1</sup>H NMR** (400 MHz, CDCl<sub>3</sub>): δ 0.87 (t, <sup>2</sup>J = 6.5 Hz, 3H, (CH<sub>2</sub>)<sub>2</sub>CH<sub>3</sub>), 1.07-1.16 (m, 1H, H-8<sub>α</sub>), 1.24-1.38 and 1.52-1.67 (m + m, 2H + 2H, (CH<sub>2</sub>)<sub>2</sub>CH<sub>3</sub>), 1.84 (m, 1H, H-15<sub>eq</sub>), 1.96 (ddd, <sup>2</sup>J = 12.6 Hz, <sup>3</sup>J = 5.5 Hz, 1H, H-15<sub>ax</sub>), 2.29 (dd, <sup>3</sup>J = 8.7 Hz, <sup>3</sup>J = 9.2 Hz, 1H, H-7<sub>β</sub>), 2.36 (s, 3H, NCH<sub>3</sub>), 2.33-2.42 (m, 2H, H-10<sub>α</sub> + H-16<sub>ax</sub>), 2.51 (dd, 1H, <sup>2</sup>J = 11.7 Hz, <sup>3</sup>J = 4.9 Hz, H-16<sub>eq</sub>), 2.90 (dd, <sup>2</sup>J = 13.1 Hz, <sup>3</sup>J = 9.2 Hz, 1H, H-8<sub>β</sub>), 3.14 (d, <sup>3</sup>J = 6.4 Hz, 1H, H-9), 3.22 (d, <sup>2</sup>J = 18.6 Hz, 1H, H-10<sub>β</sub>), 3.80 (s, 3H, 6-OCH<sub>3</sub>), 3.82 (s, 3H, 3-OCH<sub>3</sub>), 4.55 (d, <sup>4</sup>J = 1.0 Hz, 1H, H-5), 5.32 (s, 1H, OH), 5.51 (d, <sup>3</sup>J = 8.9 Hz, 1H, H-19), 5.95 (br d, <sup>3</sup>J = 8.9 Hz, 1H, H-18), 6.63 + 6.53 (AB-system, J<sub>AB</sub> = 8.1 Hz, 2H, H-1 + H-2); **<sup>13</sup>C NMR** (101 MHz, CDCl<sub>3</sub>) δ 14.97, 16.26, 22.23, 29.15, 33.51, 35.08, 42.85, 43.46, 43.86, 45.27, 46.85, 55.56, 56.76, 59.70, 78.13 (q, <sup>2</sup>J<sub>C,F</sub> = 25.3 Hz, C-CF<sub>3</sub>), 83.28, 98.56, 113.81, 119.44, 124.04,

125.65 (q,  $^1J_{C,F} = 288.5$  Hz,  $\underline{CF}_3$ ), 128.32, 134.04, 136.53, 141.69, 147.82;  $^{19}F$  NMR (282 MHz,  $CDCl_3$ ):  $\delta$  -74.04 (s, 3F,  $CF_3$ ); **HRMS (ESI)** calcd for  $C_{26}H_{33}F_3NO_4$   $[M + H]^+$ : 480.2362, found: 480.2370.

(5*R*,6*R*,7*R*,20*S*)-4,5-epoxy-3,6-dimethoxy-17-methyl-7-(1-hydroxy-1-(trifluoromethyl)pentyl)-6,14-ethenoisomorphinan (17b):

The reaction of ketone **9** (0.10 g, 0.23 mmol) with *n*-BuLi (0.30 ml, 0.98 M solution in hexane) afforded 0.07 g of **17b** (61%).

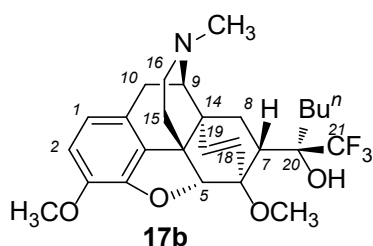

**MP:** 165-167 °C.  $^1H$  NMR (300 MHz,  $CDCl_3$ ):  $\delta$  0.88 (t,  $^2J = 6.9$  Hz, 3H,  $(CH_2)_3CH_3$ ), 1.06-1.17 (m, 1H, H-8 $\alpha$ ), 1.20-1.39 and 1.48-1.63 (m + m, 4H + 2H,  $(CH_2)_3CH_3$ ), 1.80-1.89 (m, 1H, H-15 $_{eq}$ ), 1.97 (dd,  $^2J = 12.5$  Hz,  $^3J = 5.5$  Hz, 1H, H-15 $_{ax}$ ), 2.37 (s, 3H, NCH<sub>3</sub>), 2.24-2.44 (m, 3H, H-10 $\alpha$  + H-16 $_{ax}$  + H-7 $\beta$ ), 2.51 (dd,  $^2J = 11.5$  Hz,  $^3J = 4.8$  Hz, 1H, H-16 $_{eq}$ ), 2.90 (dd,  $^2J = 12.5$  Hz,  $^3J = 9.7$  Hz, 1H, H-8 $\beta$ ), 3.15 (d,  $^3J = 6.2$  Hz, 1H, H-9), 3.22 (d,  $^2J = 18.6$  Hz, 1H, H-10 $\beta$ ), 3.80 (s, 3H, 6-OCH<sub>3</sub>), 3.82 (s, 3H, 3-OCH<sub>3</sub>), 4.56 (br s, 1H, H-5), 5.31 (s, 1H, OH), 5.50 (d,  $^3J = 8.9$  Hz, 1H, H-19), 5.94 (br d, 1H, H-18), 6.63 + 6.53 (AB-system,  $J_{AB} = 8.1$  Hz, 2H, H-1 + H-2);  $^{13}C$  NMR (101 MHz,  $CDCl_3$ )  $\delta$  13.90, 22.24, 23.52, 24.97, 29.16, 32.47, 33.49, 42.86, 43.46, 43.91, 45.27, 46.84, 55.54, 56.75, 59.70, 78.09 (q,  $^2J_{C,F} = 25.3$  Hz,  $\underline{C-CF}_3$ ), 83.28, 98.57, 113.77, 119.45, 124.00, 125.66 (q,  $^1J_{C,F} = 288.2$  Hz,  $\underline{CF}_3$ ), 128.31, 134.04, 136.52, 141.69, 147.82;  $^{19}F$  NMR (282 MHz,  $CDCl_3$ ):  $\delta$  -74.01 (s, 3F,  $CF_3$ ); **HRMS (ESI)** calcd for  $C_{27}H_{35}F_3NO_4$   $[M + H]^+$ : 494.2518, found: 494.2525.

## 2.4 Reactions of ketones **2**, **19**, **20** with $(CH_3)_3SiCF_3$ .

(5*R*,6*R*,7*R*,20*R*)-4,5-Epoxy-7-(1-hydroxy-1-methyl-2,2,2-trifluoroethyl)-3,6-dimethoxy-17-methyl-6,14-ethenoisomorphinan (15a):

A solution of **2** (0.20 g, 0.52 mmol) in THF (7 ml) and  $(CH_3)_3SiCF_3$  (0.23 ml, 1.57 mmol) was added subsequently at room temperature to a freshly dried CsF (0.004 g, 0.26 mmol). The reaction mixture was stirred for 30 min, quenched with HCl (20% aq. solution, 15 ml) followed by vigorous stirring 3 min. The resulted mixture was treated with 25% aq. ammonia solution to pH 10 and extracted with  $CHCl_3$  (3 $\times$ 12ml). The combined organic layers were dried over anhydrous  $Na_2SO_4$  and the solvent was removed *in vacuo*. A crystallization of the residue from methanol delivered 0.045 g of **15a** (19%) as colorless crystals.



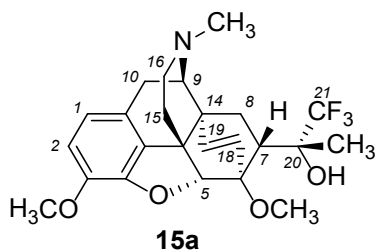

**MP:** 162-163 °C. **<sup>1</sup>H NMR** (400 MHz, CDCl<sub>3</sub>): δ 1.24-1.33 (m, 1H, H-8 $\alpha$ ), 1.34 (s, 3H, CH<sub>3</sub>), 1.82-1.90 (m, 1H, H-15<sub>eq</sub>), 1.89-2.00 (m, 1H, H-15<sub>ax</sub>), 2.07-2.16 (m, 1H, H-7 $\beta$ ), 2.37 (s, 3H, NCH<sub>3</sub>), 2.34-2.44 (m, 2H, H-10 $\alpha$  + H-16<sub>ax</sub>), 2.52 (m, 1H, H-16<sub>eq</sub>), 2.87 (dd, <sup>2</sup>J = 12.5 Hz, <sup>3</sup>J = 9.8 Hz, 1H, H-8 $\beta$ ), 3.16 (d, <sup>3</sup>J = 6.4

Hz, 1H, H-9), 3.21 (d, <sup>2</sup>J = 18.7 Hz, 1H, H-10 $\beta$ ), 3.78 (s, 3H, 6-OCH<sub>3</sub>), 3.82 (s, 3H, 3-OCH<sub>3</sub>), 4.48 (br s, 1H, H-5), 5.50 (d, <sup>3</sup>J = 9.0 Hz, 1H, H-19), 5.94 (s, 1H, OH), 6.05 (br d, 1H, H-18), 6.63 + 6.53 (AB-system, J<sub>AB</sub> = 8.1, 2H, H-1+H-2); **<sup>13</sup>C NMR** (101 MHz, CDCl<sub>3</sub>) δ 22.19, 22.58, 28.78, 33.50, 42.36, 43.49, 45.42, 46.45, 47.15, 55.37, 56.77, 59.89, 75.53 (q, <sup>2</sup>J<sub>C,F</sub> = 26.9 Hz, C-CF<sub>3</sub>), 83.39, 99.70, 113.83, 119.46, 123.18, 126.42 (q, <sup>1</sup>J<sub>C,F</sub> = 288.0 Hz, C-F<sub>3</sub>), 128.15, 134.21, 135.81, 141.80, 147.84; **<sup>19</sup>F NMR** (282 MHz, CDCl<sub>3</sub>): δ - 74.52 (s, 3F, CF<sub>3</sub>); Found (%): C 63.89, H 6.29, N 3.04, F 12.56; C<sub>24</sub>H<sub>28</sub>F<sub>3</sub>NO<sub>4</sub> Calculated (%): C 63.85, H 6.25, N 3.10, F 12.62; **HRMS (ESI)** calcd for C<sub>24</sub>H<sub>29</sub>F<sub>3</sub>NO<sub>4</sub> [M + H]<sup>+</sup>: 452.2049, found: 452.2041

(5R,6R,7R,20R)-4,5-Epoxy-7-(1-hydroxy-1-(trifluoromethyl)ethyl)-3,6-dimethoxy-17-methyl-6,14-ethenoisomorphinan (**16a**):

A solution of **19** (0.036 g, 0.100 mmol) in THF (5 ml) and (CH<sub>3</sub>)<sub>3</sub>SiCF<sub>3</sub> (0.04 ml, 0.27 mmol) were added subsequently at room temperature to a freshly dried CsF (0.015 g, 0.100 mmol). The reaction mixture was stirred for 15 min, quenched with HCl (18% aq. solution, 3 ml) followed by vigorous stirring 3 min. The resulted mixture was treated with 25% aq. ammonia solution to pH 10 and extracted with CHCl<sub>3</sub> (3×7ml). The combined organic layers were dried over anhydrous Na<sub>2</sub>SO<sub>4</sub> and the solvent was removed in vacuo. The products were separated by preparative TLC on silica gel (CHCl<sub>3</sub> : hexane : MeOH : 25% aq. soln. of NH<sub>3</sub> = 800 : 800 : 15 : 1) affording 0.011 mg of **16a** (24%) as yellowish oil.

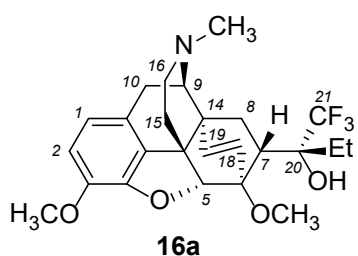

**<sup>1</sup>H NMR** (300 MHz, CDCl<sub>3</sub>): δ 1.07 (t, <sup>2</sup>J = 7.4 Hz, 3H, CH<sub>3</sub>CH<sub>2</sub>), 1.31 (m, 1H, H-8 $\alpha$ ), 1.54-1.71 (m, 2H, CH<sub>3</sub>CH<sub>2</sub>), 1.82 - 1.92 (m, 2H, H-15<sub>eq</sub> + H-15<sub>ax</sub>), 2.15 (dd, <sup>3</sup>J = 8.7 Hz, <sup>3</sup>J = 10.5 Hz, 1H, H-7 $\beta$ ), 2.36 (s, 3H, NCH<sub>3</sub>), 2.31-2.44 (m, 2H, H-10 $\alpha$  + H-16<sub>ax</sub>), 2.51 (m, H-16<sub>eq</sub>), 2.82 (dd, <sup>2</sup>J = 13.5 Hz, <sup>3</sup>J = 9.8 Hz, 1H, H-8 $\beta$ ), 3.15 (d, <sup>3</sup>J = 6.5 Hz, 1H, H-9), 3.21 (d, <sup>2</sup>J = 18.6 Hz, 1H, H-10 $\beta$ ), 3.78 (s, 3H, 6-OCH<sub>3</sub>), 3.82 (s, 3H, 3-OCH<sub>3</sub>), 4.48 (br d, 1H, H-5), 5.48 (d, <sup>3</sup>J = 9.0 Hz, 1H, H-19), 5.91 (s, 1H, OH), 6.07 (br d, 1H, H-18), 6.63 + 6.52 (AB-system, J<sub>AB</sub> = 8.1 Hz, 2H, H-1 + H-2); **<sup>13</sup>C NMR** (126 MHz, CDCl<sub>3</sub>) δ 7.05, 22.21, 25.76, 28.14, 29.69, 33.59, 42.29, 42.36, 43.55, 45.43, 55.39, 56.76, 59.88, 77.31 (q, <sup>2</sup>J<sub>C,F</sub>

= 25.5 Hz,  $\underline{\text{C}}\text{-CF}_3$ ), 83.23, 99.96, 113.77, 119.45, 123.59, 126.76 (q,  $^1J_{\text{C,F}} = 288.6$  Hz,  $\underline{\text{C}}\text{F}_3$ ), 128.23, 134.23, 135.48, 141.79, 147.90;  $^{19}\text{F}$  NMR (282 MHz,  $\text{CDCl}_3$ ):  $\delta$  -73.89 (s, 3F,  $\text{CF}_3$ ); HRMS (ESI) calcd for  $\text{C}_{25}\text{H}_{31}\text{F}_3\text{NO}_4$   $[\text{M} + \text{H}]^+$ : 466.2205, found: 466.2210.

(5R,6R,7R,20R)-4,5-Epoxy-3,6-dimethoxy-17-methyl-7-(1-hydroxy-1-(trifluoromethyl)propyl)-6,14-ethenoisomorphinan (17a):

A solution of **20** (0.2 g, 0.47 mmol) in THF (15 ml),  $(\text{CH}_3)_3\text{SiCF}_3$  (0.21 ml, 1.41 mmol) and HMPA (0.41 ml, 2.35 mmol) were added subsequently at room temperature to a freshly dried CsF (0.072 g, 0.47 mmol). The reaction mixture was stirred under reflux for 11 h. The reaction mixture was allowed to cool to the room temperature, quenched with HCl (18% aq. solution, 10 ml) followed by vigorous stirring 30 min. The resulted mixture was treated with 25% aq. ammonia solution to pH 10 and extracted with  $\text{CHCl}_3$  (3 $\times$ 15ml). The combined organic layers were dried over anhydrous  $\text{Na}_2\text{SO}_4$  and the solvent was removed *in vacuo*. The products were separated by preparative TLC on silica gel ( $\text{CHCl}_3$  : MeOH : 25% aq. soln. of  $\text{NH}_3 = 1500$ : 15 : 1) affording crude main product **17a** (0.065 g, 28%) as colourless solid. Pure colourless crystals of **17a** (0.030 g, 13 %) suitable for X-ray were obtained after crystallization from MeOH.

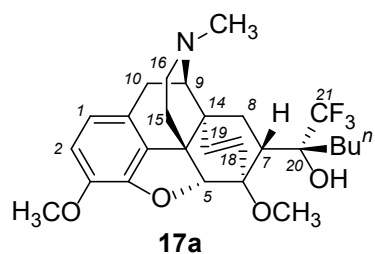

**MP:** 176-178 °C;  $^1\text{H}$  NMR (400 MHz,  $\text{CDCl}_3$ ): 0.97 (t, 3H,  $(\text{CH}_2)_3\text{CH}_3$ ), 1.32 (m, 1H, H-8 $\alpha$ ), 1.22-1.44 and 1.53-1.70 (m + m, 6H,  $(\text{CH}_2)_3\text{CH}_3$ ), 1.82-1.95 (m, 2H, H-15 $_{\text{eq}}$  + H-15 $_{\text{ax}}$ ), 2.15 (m, 1H, H-7 $\beta$ ), 2.38 (s, 3H,  $\text{NCH}_3$ ), 2.30-2.47 (m, 2H, H-10 $\alpha$  + H-16 $_{\text{ax}}$ ), 2.54 (m, 1H, H-16 $_{\text{eq}}$ ), 2.82 (m, 1H, H-8 $\beta$ ), 3.15 (d,  $^3J = 6.4$  Hz, 1H, H-9), 3.22 (d,  $^2J = 18.6$  Hz, 1H, H-10 $\beta$ ), 3.77 (s, 3H, 6-O $\text{CH}_3$ ), 3.82 (s, 3H, 3-O $\text{CH}_3$ ), 4.47 (s, 1H, H-5), 5.48 (d,  $^3J = 9.1$  Hz, 1H, H-19), 5.94 (s, 1H, OH), 6.06 (br d, 1H, H-18), 6.52 + 6.63 (AB-system,  $J_{\text{AB}} = 8.1$  Hz, 2H, H-1 + H-2);  $^{13}\text{C}$  NMR (101 MHz,  $\text{CDCl}_3$ ):  $\delta$  14.13, 22.29, 23.22, 24.53, 28.23, 33.02, 33.53, 42.31, 43.13, 43.55, 45.47, 46.47, 55.40, 56.78, 59.93, 77.23 (q  $^2J_{\text{C,F}} = 25.8$  Hz,  $\underline{\text{C}}\text{H-CF}_3$ ), 83.34, 99.90, 113.82, 119.48, 123.63, 126.70 (q,  $^1J_{\text{C,F}} = 289.1$  Hz,  $\underline{\text{C}}\text{F}_3$ ), 128.13, 134.24, 135.44, 141.84, 147.90;  $^{19}\text{F}$ -NMR (300 MHz,  $\text{CDCl}_3$ ): -73.83 (s, 3F,  $\text{CF}_3$ ); HRMS (ESI) calcd for  $\text{C}_{27}\text{H}_{35}\text{F}_3\text{NO}_4$   $[\text{M} + \text{H}]^+$ : 494.2518, found: 494.2523.

## 2.5 21-*n*-Propylthevinone (**20**).

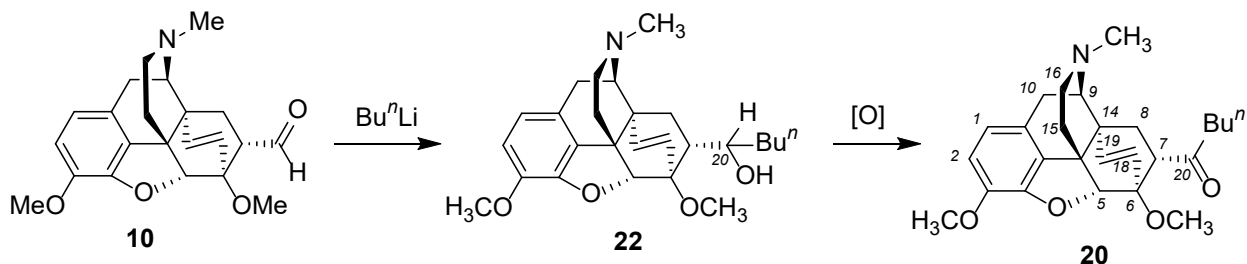

A solution of  $\text{Bu}^n\text{Li}$  (0.73 ml, 1.2 M in hexane) was added in one portion to a solution of **10** (0.3 g, 0.8 mmol) in THF (12 ml) at room temperature. The resulted reaction mixture was stirred for 2 h. Water (20 ml) was added and the products were extracted with  $\text{CHCl}_3$  ( $3 \times 15$  ml). The combined organic layers were dried over anhydrous  $\text{Na}_2\text{SO}_4$  and the solvent was removed *in vacuo*. A mixture of the epimeric alcohols **22** (in 1:4 ratio according to the NMR data) was separated by flash column chromatography ( $\text{CHCl}_3$  : MeOH : 25% aq. soln. of  $\text{NH}_3$  = 1500: 15 : 1) affording 0.24 g of **22** (70%) as colorless oil.

Dess-Martin periodinane (0.72 g, 1.70 mmol) was added in one portion to a stirred solution of **22** (0.24 g, 0.565 mmol) in  $\text{CH}_2\text{Cl}_2$  (10 ml). The reaction mixture was stirred at room temperature for 2 h. The resulted mixture was treated with NaOH (20% aq. solution) and extracted with  $\text{CHCl}_3$  ( $3 \times 20$  ml). The combined organic layers were dried over anhydrous  $\text{Na}_2\text{SO}_4$  and the solvent removed *in vacuo* to afford 0.22 g of **20** (92%) as yellowish oil. Total yield of **20** from **10** is 65%.

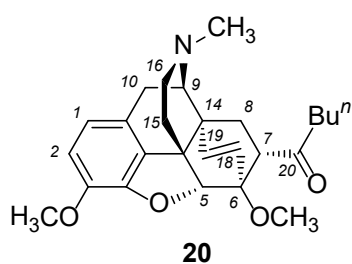

**$^1\text{H}$  NMR** (400 MHz,  $\text{CDCl}_3$ ): 0.84 (t, 3H,  $(\text{CH}_2)_3\text{CH}_3$ ), 1.16-1.34 and 1.40-1.51 (m + m, 5H + 2H,  $(\text{CH}_2)_3\text{CH}_3$  + H-8 $\alpha$ ), 1.79 (m, 1H, H-15 $_{\text{eq}}$ ), 1.94 (m, 1H, H-15 $_{\text{ax}}$ ), 2.32 (s, 1H, NCH $_3$ ), 2.26-2.57 (m, 4H, H-10 $\alpha$  + 2H-16 + H-7 $\beta$ ), 2.86 (m, 1H, H-8 $\beta$ ), 3.15 (d,  $^3J = 6.0$  Hz, 1H, H-9), 3.18 (d,  $^2J = 18.0$  Hz, 1H, H-10 $\beta$ ), 3.55 (s, 3H, 6-OCH $_3$ ), 3.77 (s, 3H, 3-OCH $_3$ ), 4.52 (s, 1H, H-5), 5.51 (d,  $^3J = 8.8$  Hz, 1H, H-19), 5.87 (d,  $^3J = 8.8$  Hz, 1H, H-18), 6.49 + 6.58 (AB-system,  $J_{\text{AB}} = 8.1$  Hz, 2H, H-1 + H-2);  **$^{13}\text{C}$  NMR** (101 MHz,  $\text{CDCl}_3$ )  $\delta$  13.90, 22.24, 22.42, 25.54, 29.68, 30.26, 33.43, 43.24, 43.50, 45.51, 47.40, 49.94, 53.76, 56.65, 59.99, 81.50, 95.85, 113.56, 119.32, 125.82, 128.25, 134.09, 135.55, 141.83, 148.04, 211.09; **HRMS (ESI)** calcd for  $\text{C}_{26}\text{H}_{34}\text{NO}_4$  [ $\text{M} + \text{H}$ ] $^+$ : 424.2488, found: 424.2497.

### 3. Quantum chemical calculation details

The possible conformers for alcohols **15a** and **15b** were found by calculating the potential energy curve along to the rotation around C(7)-C(20) bond at the PBE0/Def2-TZVP level.[4,5] The geometry optimization of conformers for **2**, **9**, **10**, **15a**, and **15b** compounds was performed at the RIMP2/Def2-TZVP level of theory [5,6] using the ORCA program [7]. As the objects of calculation are huge, to accelerate the process, the RIJCOSX [8] approximation was utilized with Def2/J fitting basis set [9].

#### xyz-Cartesian coordinates optimized at RIMP2/Def2-TZVP level

**2** conformer A  $E_{\text{tot}} = -1245.792940314542$  a.u.

|   |              |              |              |
|---|--------------|--------------|--------------|
| O | 8.597179000  | 9.188582000  | 4.933442000  |
| O | 6.456622000  | 9.937844000  | 2.370861000  |
| O | 7.738429000  | 10.871946000 | -2.727484000 |
| O | 7.387790000  | 11.584528000 | -0.018932000 |
| N | 11.253121000 | 13.806358000 | 2.736466000  |
| C | 11.171574000 | 11.785116000 | -1.600932000 |
| H | 12.193553000 | 11.712089000 | -1.961374000 |
| C | 10.127941000 | 11.405159000 | -2.457115000 |
| H | 10.375011000 | 11.092705000 | -3.463741000 |
| C | 8.796460000  | 11.344779000 | -2.016914000 |
| C | 8.557455000  | 11.754059000 | -0.704607000 |
| C | 7.676287000  | 11.855909000 | 1.386247000  |
| H | 6.874543000  | 12.514532000 | 1.736589000  |
| C | 7.702475000  | 10.596162000 | 2.269107000  |
| C | 8.009715000  | 11.153512000 | 3.704028000  |
| H | 7.282982000  | 11.955577000 | 3.880428000  |
| C | 9.451826000  | 11.687610000 | 3.785555000  |
| H | 10.055715000 | 11.010845000 | 4.396170000  |
| H | 9.481241000  | 12.679102000 | 4.240124000  |
| C | 11.395354000 | 12.435218000 | 2.235610000  |
| H | 12.105897000 | 11.936990000 | 2.907509000  |
| C | 11.963196000 | 12.345909000 | 0.783806000  |
| H | 12.601485000 | 13.217582000 | 0.601980000  |
| H | 12.628945000 | 11.478253000 | 0.718835000  |
| C | 10.913427000 | 12.199032000 | -0.291369000 |
| C | 9.576456000  | 12.262569000 | 0.071539000  |
| C | 9.067559000  | 12.511396000 | 1.448030000  |
| C | 10.037823000 | 11.731159000 | 2.362265000  |
| C | 9.006125000  | 13.992827000 | 1.816259000  |
| H | 8.390897000  | 14.517353000 | 1.077013000  |
| H | 8.520001000  | 14.104199000 | 2.791650000  |
| C | 10.395196000 | 14.604417000 | 1.871257000  |
| H | 10.807440000 | 14.695403000 | 0.849623000  |
| H | 10.343553000 | 15.616365000 | 2.284046000  |
| C | 12.529896000 | 14.459623000 | 2.956610000  |
| H | 12.359564000 | 15.413160000 | 3.460644000  |
| H | 13.089472000 | 14.667267000 | 2.030041000  |
| H | 13.152406000 | 13.836004000 | 3.601302000  |
| C | 8.844882000  | 9.714728000  | 1.859944000  |

|   |              |              |              |
|---|--------------|--------------|--------------|
| H | 8.689126000  | 8.668747000  | 1.623994000  |
| C | 10.050435000 | 10.304210000 | 1.897786000  |
| H | 10.975515000 | 9.779173000  | 1.677464000  |
| C | 7.753357000  | 10.038523000 | 4.713143000  |
| C | 8.025616000  | 10.408197000 | -4.037551000 |
| H | 7.077044000  | 10.069727000 | -4.446664000 |
| H | 8.734213000  | 9.575508000  | -4.015428000 |
| H | 8.427296000  | 11.210897000 | -4.662109000 |
| C | 5.933486000  | 9.395917000  | 1.158173000  |
| H | 5.170834000  | 8.678843000  | 1.458977000  |
| H | 6.705957000  | 8.884113000  | 0.579620000  |
| H | 5.490534000  | 10.171268000 | 0.532830000  |
| C | 6.427482000  | 10.063268000 | 5.421752000  |
| H | 5.623595000  | 10.136683000 | 4.688597000  |
| H | 6.311821000  | 9.172199000  | 6.036020000  |
| H | 6.381303000  | 10.954123000 | 6.055484000  |

**2 conformer B**  $E_{\text{tot}} = -1245.791594876890$  a.u.

|   |              |              |              |
|---|--------------|--------------|--------------|
| O | 6.731287000  | 11.130442000 | 5.793798000  |
| O | 6.163013000  | 10.336025000 | 2.424948000  |
| O | 7.681069000  | 10.915956000 | -2.705069000 |
| O | 7.321622000  | 11.757940000 | -0.039810000 |
| N | 11.297796000 | 13.728946000 | 2.758886000  |
| C | 11.147520000 | 11.577319000 | -1.512481000 |
| H | 12.168880000 | 11.403634000 | -1.838454000 |
| C | 10.098766000 | 11.255706000 | -2.385747000 |
| H | 10.344463000 | 10.885205000 | -3.372797000 |
| C | 8.756401000  | 11.326478000 | -1.982841000 |
| C | 8.518878000  | 11.806034000 | -0.693929000 |
| C | 7.585228000  | 12.075489000 | 1.359389000  |
| H | 6.839834000  | 12.824142000 | 1.646408000  |
| C | 7.465327000  | 10.867006000 | 2.308294000  |
| C | 7.784993000  | 11.488679000 | 3.700295000  |
| H | 7.188960000  | 12.403735000 | 3.784638000  |
| C | 9.287197000  | 11.833488000 | 3.821155000  |
| H | 9.806650000  | 11.120252000 | 4.470045000  |
| H | 9.420322000  | 12.823511000 | 4.258611000  |
| C | 11.325840000 | 12.336060000 | 2.302407000  |
| H | 11.969890000 | 11.796509000 | 3.008953000  |
| C | 11.921598000 | 12.149651000 | 0.872181000  |
| H | 12.639338000 | 12.955533000 | 0.683526000  |
| H | 12.509604000 | 11.225411000 | 0.852060000  |
| C | 10.891113000 | 12.061000000 | -0.226900000 |
| C | 9.555881000  | 12.257610000 | 0.094249000  |
| C | 9.032370000  | 12.601566000 | 1.445732000  |
| C | 9.904589000  | 11.766304000 | 2.413652000  |
| C | 9.100399000  | 14.092924000 | 1.770480000  |
| H | 8.557063000  | 14.649774000 | 0.999374000  |
| H | 8.600410000  | 14.278183000 | 2.727343000  |
| C | 10.538447000 | 14.575462000 | 1.848718000  |
| H | 10.984129000 | 14.598831000 | 0.837386000  |
| H | 10.569194000 | 15.599303000 | 2.232991000  |
| C | 12.623066000 | 14.269807000 | 2.996835000  |
| H | 12.527676000 | 15.248642000 | 3.471033000  |
| H | 13.222107000 | 14.399359000 | 2.080874000  |
| H | 13.169719000 | 13.611312000 | 3.674803000  |
| C | 8.523731000  | 9.866111000  | 1.939839000  |

|   |              |              |              |
|---|--------------|--------------|--------------|
| H | 8.266033000  | 8.845353000  | 1.680021000  |
| C | 9.783243000  | 10.331360000 | 1.986867000  |
| H | 10.652872000 | 9.720704000  | 1.759347000  |
| C | 7.342706000  | 10.625351000 | 4.868464000  |
| C | 7.959877000  | 10.386045000 | -3.991802000 |
| H | 6.996093000  | 10.116267000 | -4.416070000 |
| H | 8.593214000  | 9.497079000  | -3.924184000 |
| H | 8.444580000  | 11.130484000 | -4.629366000 |
| C | 5.567703000  | 9.861465000  | 1.218717000  |
| H | 4.715703000  | 9.257531000  | 1.527289000  |
| H | 6.261230000  | 9.246995000  | 0.638680000  |
| H | 5.228661000  | 10.684754000 | 0.589178000  |
| C | 7.718658000  | 9.165941000  | 4.876836000  |
| H | 8.762531000  | 9.016863000  | 4.598297000  |
| H | 7.525286000  | 8.753913000  | 5.865955000  |
| H | 7.104349000  | 8.647817000  | 4.137491000  |

**9 conformer A**  $E_{\text{tot}} = -1543.216214869761$  a.u.

|   |              |              |              |
|---|--------------|--------------|--------------|
| F | 6.165508000  | 9.300358000  | 6.346121000  |
| F | 6.851072000  | 11.357706000 | 6.411041000  |
| F | 5.408223000  | 10.739155000 | 4.925158000  |
| O | 8.343864000  | 9.044736000  | 4.837618000  |
| O | 6.484173000  | 9.854186000  | 2.363456000  |
| O | 7.775159000  | 10.881848000 | -2.779285000 |
| O | 7.406526000  | 11.509488000 | -0.055776000 |
| N | 11.214885000 | 13.770344000 | 2.755570000  |
| C | 11.185555000 | 11.841276000 | -1.623028000 |
| H | 12.209588000 | 11.800102000 | -1.982477000 |
| C | 10.152550000 | 11.459625000 | -2.491229000 |
| H | 10.407778000 | 11.179312000 | -3.505254000 |
| C | 8.822179000  | 11.357157000 | -2.055811000 |
| C | 8.572957000  | 11.726136000 | -0.733642000 |
| C | 7.674271000  | 11.784159000 | 1.349121000  |
| H | 6.858993000  | 12.429237000 | 1.693402000  |
| C | 7.715941000  | 10.527265000 | 2.232974000  |
| C | 8.007727000  | 11.117216000 | 3.656329000  |
| H | 7.311054000  | 11.949628000 | 3.796511000  |
| C | 9.463900000  | 11.608753000 | 3.767288000  |
| H | 10.057714000 | 10.899749000 | 4.351115000  |
| H | 9.512503000  | 12.582379000 | 4.256941000  |
| C | 11.385836000 | 12.413050000 | 2.227472000  |
| H | 12.104567000 | 11.915379000 | 2.891212000  |
| C | 11.959016000 | 12.362526000 | 0.776489000  |
| H | 12.582644000 | 13.248773000 | 0.615615000  |
| H | 12.640110000 | 11.508106000 | 0.696714000  |
| C | 10.915574000 | 12.218576000 | -0.304813000 |
| C | 9.576783000  | 12.243531000 | 0.056366000  |
| C | 9.056707000  | 12.460763000 | 1.434481000  |
| C | 10.039974000 | 11.683081000 | 2.339288000  |
| C | 8.967584000  | 13.933360000 | 1.831383000  |
| H | 8.344389000  | 14.461298000 | 1.101514000  |
| H | 8.477203000  | 14.017016000 | 2.807750000  |
| C | 10.344866000 | 14.569126000 | 1.902786000  |
| H | 10.758161000 | 14.687598000 | 0.884696000  |
| H | 10.272416000 | 15.571270000 | 2.335485000  |
| C | 12.477903000 | 14.444236000 | 2.995029000  |
| H | 12.285900000 | 15.383466000 | 3.517500000  |

|   |              |              |              |
|---|--------------|--------------|--------------|
| H | 13.036642000 | 14.681817000 | 2.075439000  |
| H | 13.110070000 | 13.820373000 | 3.629950000  |
| C | 8.869013000  | 9.659334000  | 1.824470000  |
| H | 8.721378000  | 8.615020000  | 1.576734000  |
| C | 10.068692000 | 10.261904000 | 1.859181000  |
| H | 10.999004000 | 9.750567000  | 1.628586000  |
| C | 7.690049000  | 10.047585000 | 4.669114000  |
| C | 6.491150000  | 10.342832000 | 5.596704000  |
| C | 8.068527000  | 10.471268000 | -4.105967000 |
| H | 7.126184000  | 10.126616000 | -4.524009000 |
| H | 8.795177000  | 9.654194000  | -4.115123000 |
| H | 8.449993000  | 11.304823000 | -4.701952000 |
| C | 5.942596000  | 9.301387000  | 1.164454000  |
| H | 5.167896000  | 8.606774000  | 1.484509000  |
| H | 6.701112000  | 8.762544000  | 0.591486000  |
| H | 5.511380000  | 10.075253000 | 0.529134000  |

**9 conformer B**  $E_{\text{rot}} = -1543.211149942889$  a.u.

|   |              |              |              |
|---|--------------|--------------|--------------|
| F | 8.005100000  | 8.069375000  | 5.933413000  |
| F | 7.736926000  | 7.819964000  | 3.811272000  |
| F | 9.581774000  | 8.646464000  | 4.581786000  |
| O | 6.875660000  | 10.355068000 | 5.586956000  |
| O | 6.451371000  | 9.845171000  | 2.263614000  |
| O | 7.773411000  | 10.964773000 | -2.849812000 |
| O | 7.399096000  | 11.533532000 | -0.106741000 |
| N | 11.208696000 | 13.716065000 | 2.758337000  |
| C | 11.185099000 | 11.873938000 | -1.658361000 |
| H | 12.210214000 | 11.832288000 | -2.014688000 |
| C | 10.152367000 | 11.517217000 | -2.537226000 |
| H | 10.409799000 | 11.255668000 | -3.555637000 |
| C | 8.819218000  | 11.415596000 | -2.109189000 |
| C | 8.567393000  | 11.758514000 | -0.779895000 |
| C | 7.667754000  | 11.775711000 | 1.305376000  |
| H | 6.853138000  | 12.412719000 | 1.665630000  |
| C | 7.698747000  | 10.489609000 | 2.156059000  |
| C | 7.992672000  | 11.025528000 | 3.591928000  |
| H | 7.287275000  | 11.846883000 | 3.760474000  |
| C | 9.441408000  | 11.559618000 | 3.714843000  |
| H | 10.069261000 | 10.902085000 | 4.318583000  |
| H | 9.443591000  | 12.540469000 | 4.191008000  |
| C | 11.375644000 | 12.369604000 | 2.202179000  |
| H | 12.089612000 | 11.854302000 | 2.857499000  |
| C | 11.953212000 | 12.348288000 | 0.752027000  |
| H | 12.576812000 | 13.238120000 | 0.612024000  |
| H | 12.635150000 | 11.496345000 | 0.655490000  |
| C | 10.912367000 | 12.228889000 | -0.334671000 |
| C | 9.572294000  | 12.255591000 | 0.021968000  |
| C | 9.049455000  | 12.447394000 | 1.402627000  |
| C | 10.025530000 | 11.644861000 | 2.294125000  |
| C | 8.966657000  | 13.913335000 | 1.824507000  |
| H | 8.354316000  | 14.457422000 | 1.097328000  |
| H | 8.466306000  | 13.985414000 | 2.796446000  |
| C | 10.347973000 | 14.537925000 | 1.917769000  |
| H | 10.768362000 | 14.675231000 | 0.904949000  |
| H | 10.279704000 | 15.531343000 | 2.370757000  |
| C | 12.473757000 | 14.377618000 | 3.019639000  |
| H | 12.283844000 | 15.306637000 | 3.560769000  |

|   |              |              |              |
|---|--------------|--------------|--------------|
| H | 13.039551000 | 14.631324000 | 2.108674000  |
| H | 13.098569000 | 13.736969000 | 3.645067000  |
| C | 8.848023000  | 9.637641000  | 1.699613000  |
| H | 8.703833000  | 8.611840000  | 1.383516000  |
| C | 10.048161000 | 10.237457000 | 1.770309000  |
| H | 10.975444000 | 9.739956000  | 1.500504000  |
| C | 7.627977000  | 10.049964000 | 4.687567000  |
| C | 8.248809000  | 8.621349000  | 4.750436000  |
| C | 8.072052000  | 10.585623000 | -4.184780000 |
| H | 7.130094000  | 10.258568000 | -4.617507000 |
| H | 8.793020000  | 9.763876000  | -4.210578000 |
| H | 8.463305000  | 11.431050000 | -4.757346000 |
| C | 5.910982000  | 9.310861000  | 1.056146000  |
| H | 5.120115000  | 8.629000000  | 1.363842000  |
| H | 6.663296000  | 8.759961000  | 0.486657000  |
| H | 5.500704000  | 10.096109000 | 0.420580000  |

**10 conformer A**  $E_{\text{tot}}=-1206.564395967521$ . a.u.

|   |              |              |              |
|---|--------------|--------------|--------------|
| O | 8.711649000  | 9.315548000  | 5.211563000  |
| O | 6.464780000  | 9.879986000  | 2.307056000  |
| O | 7.743589000  | 10.889373000 | -2.748125000 |
| O | 7.380194000  | 11.589920000 | -0.035799000 |
| N | 11.230304000 | 13.787824000 | 2.752854000  |
| C | 11.173354000 | 11.791092000 | -1.599863000 |
| H | 12.196535000 | 11.721088000 | -1.957428000 |
| C | 10.132685000 | 11.416994000 | -2.462632000 |
| H | 10.383973000 | 11.110537000 | -3.470044000 |
| C | 8.798570000  | 11.355901000 | -2.029344000 |
| C | 8.554356000  | 11.758014000 | -0.715861000 |
| C | 7.670262000  | 11.832755000 | 1.374144000  |
| H | 6.865781000  | 12.477914000 | 1.742882000  |
| C | 7.703555000  | 10.550726000 | 2.223116000  |
| C | 8.017822000  | 11.051048000 | 3.678693000  |
| H | 7.237499000  | 11.786441000 | 3.917570000  |
| C | 9.426263000  | 11.657378000 | 3.772428000  |
| H | 10.048639000 | 11.028213000 | 4.414682000  |
| H | 9.398874000  | 12.656490000 | 4.208606000  |
| C | 11.381753000 | 12.421595000 | 2.243123000  |
| H | 12.092256000 | 11.921756000 | 2.913712000  |
| C | 11.955104000 | 12.345841000 | 0.791326000  |
| H | 12.584016000 | 13.225917000 | 0.617515000  |
| H | 12.631219000 | 11.486610000 | 0.722088000  |
| C | 10.910187000 | 12.197362000 | -0.288592000 |
| C | 9.571585000  | 12.257244000 | 0.068598000  |
| C | 9.058115000  | 12.492579000 | 1.445186000  |
| C | 10.028063000 | 11.709436000 | 2.358638000  |
| C | 8.988068000  | 13.971749000 | 1.820648000  |
| H | 8.376760000  | 14.496245000 | 1.078126000  |
| H | 8.492460000  | 14.078384000 | 2.791548000  |
| C | 10.374053000 | 14.588551000 | 1.888802000  |
| H | 10.792210000 | 14.689827000 | 0.870471000  |
| H | 10.315285000 | 15.597061000 | 2.308935000  |
| C | 12.502479000 | 14.445417000 | 2.985711000  |
| H | 12.325039000 | 15.393888000 | 3.496728000  |
| H | 13.066097000 | 14.663468000 | 2.063930000  |
| H | 13.124660000 | 13.819731000 | 3.628671000  |
| C | 8.857885000  | 9.689453000  | 1.799521000  |



|   |              |              |              |
|---|--------------|--------------|--------------|
| H | 8.712955000  | 8.650222000  | 1.527185000  |
| C | 10.058189000 | 10.287154000 | 1.876605000  |
| H | 10.990716000 | 9.776500000  | 1.653340000  |
| C | 7.813159000  | 9.883615000  | 4.624081000  |
| C | 8.035806000  | 10.433583000 | -4.059874000 |
| H | 7.088771000  | 10.098400000 | -4.475186000 |
| H | 8.743606000  | 9.600163000  | -4.040415000 |
| H | 8.440657000  | 11.239641000 | -4.677962000 |
| C | 5.940994000  | 9.373839000  | 1.079453000  |
| H | 5.191940000  | 8.634431000  | 1.359292000  |
| H | 6.716855000  | 8.896358000  | 0.476356000  |
| H | 5.480740000  | 10.163598000 | 0.485623000  |
| H | 6.767171000  | 9.558672000  | 4.746151000  |

**10 conformer B**  $E_{\text{tot}} = -1206.564163099856$  a.u.

|   |              |              |              |
|---|--------------|--------------|--------------|
| O | 7.201050000  | 10.103656000 | 5.707968000  |
| O | 6.468224000  | 9.864501000  | 2.351196000  |
| O | 7.768136000  | 10.884475000 | -2.776523000 |
| O | 7.394552000  | 11.538433000 | -0.056147000 |
| N | 11.218035000 | 13.767345000 | 2.757675000  |
| C | 11.183533000 | 11.816408000 | -1.613937000 |
| H | 12.208256000 | 11.762688000 | -1.969856000 |
| C | 10.149177000 | 11.438895000 | -2.482190000 |
| H | 10.405142000 | 11.147851000 | -3.492969000 |
| C | 8.816051000  | 11.354748000 | -2.050742000 |
| C | 8.565177000  | 11.736199000 | -0.731844000 |
| C | 7.666341000  | 11.802323000 | 1.353368000  |
| H | 6.857103000  | 12.451528000 | 1.703052000  |
| C | 7.701105000  | 10.539261000 | 2.229935000  |
| C | 7.996224000  | 11.082952000 | 3.658132000  |
| H | 7.265796000  | 11.866583000 | 3.883513000  |
| C | 9.442735000  | 11.623326000 | 3.761980000  |
| H | 10.065450000 | 10.958179000 | 4.371578000  |
| H | 9.456988000  | 12.603458000 | 4.239325000  |
| C | 11.381247000 | 12.408605000 | 2.232094000  |
| H | 12.095560000 | 11.907169000 | 2.897900000  |
| C | 11.956214000 | 12.352822000 | 0.781586000  |
| H | 12.578490000 | 13.239613000 | 0.618317000  |
| H | 12.639084000 | 11.499592000 | 0.704220000  |
| C | 10.913004000 | 12.206209000 | -0.299550000 |
| C | 9.573316000  | 12.246503000 | 0.057820000  |
| C | 9.053103000  | 12.470095000 | 1.434747000  |
| C | 10.030946000 | 11.687874000 | 2.342111000  |
| C | 8.973618000  | 13.944395000 | 1.827111000  |
| H | 8.358003000  | 14.473997000 | 1.092022000  |
| H | 8.478064000  | 14.034776000 | 2.799875000  |
| C | 10.355174000 | 14.570506000 | 1.901683000  |
| H | 10.772571000 | 14.685079000 | 0.884701000  |
| H | 10.288717000 | 15.573805000 | 2.332666000  |
| C | 12.484572000 | 14.432958000 | 2.999743000  |
| H | 12.297751000 | 15.374106000 | 3.520644000  |
| H | 13.047800000 | 14.665494000 | 2.081465000  |
| H | 13.110756000 | 13.805667000 | 3.637297000  |
| C | 8.851912000  | 9.672386000  | 1.802304000  |
| H | 8.699399000  | 8.638704000  | 1.512789000  |
| C | 10.055402000 | 10.267586000 | 1.854535000  |
| H | 10.982791000 | 9.761113000  | 1.601286000  |

|   |             |              |              |
|---|-------------|--------------|--------------|
| C | 7.805111000 | 9.980355000  | 4.663951000  |
| C | 8.065816000 | 10.458223000 | -4.097199000 |
| H | 7.122901000 | 10.119446000 | -4.518762000 |
| H | 8.784044000 | 9.633576000  | -4.094059000 |
| H | 8.460275000 | 11.281644000 | -4.698895000 |
| C | 5.911718000 | 9.355565000  | 1.140131000  |
| H | 5.140804000 | 8.648813000  | 1.442811000  |
| H | 6.661980000 | 8.840208000  | 0.534941000  |
| H | 5.471048000 | 10.150998000 | 0.538397000  |
| H | 8.315479000 | 9.029048000  | 4.408788000  |

**15a** conformer  $t E_{\text{tot}} = -1583.632156198033$  a.u.

|   |              |              |              |
|---|--------------|--------------|--------------|
| O | 8.763114000  | 9.289245000  | 4.903012000  |
| O | 6.243416000  | 10.180438000 | 2.160738000  |
| O | 7.741093000  | 10.875765000 | -2.753279000 |
| O | 7.348163000  | 11.736591000 | -0.081511000 |
| N | 11.242255000 | 13.777075000 | 2.744633000  |
| C | 11.189411000 | 11.605896000 | -1.537758000 |
| H | 12.215038000 | 11.451050000 | -1.859853000 |
| C | 10.149934000 | 11.259424000 | -2.413471000 |
| H | 10.408191000 | 10.887765000 | -3.396894000 |
| C | 8.801782000  | 11.308428000 | -2.022253000 |
| C | 8.547051000  | 11.791458000 | -0.738131000 |
| C | 7.626301000  | 12.005823000 | 1.327640000  |
| H | 6.850474000  | 12.701763000 | 1.662732000  |
| C | 7.537757000  | 10.730767000 | 2.201268000  |
| C | 7.817143000  | 11.219399000 | 3.670620000  |
| H | 7.067511000  | 11.996529000 | 3.861709000  |
| C | 9.251846000  | 11.824566000 | 3.748092000  |
| H | 9.860873000  | 11.260277000 | 4.453303000  |
| H | 9.223619000  | 12.852154000 | 4.107779000  |
| C | 11.320079000 | 12.388900000 | 2.283471000  |
| H | 11.974131000 | 11.865771000 | 2.992604000  |
| C | 11.934114000 | 12.228724000 | 0.852270000  |
| H | 12.609424000 | 13.071813000 | 0.669686000  |
| H | 12.570924000 | 11.337508000 | 0.834712000  |
| C | 10.916621000 | 12.093258000 | -0.256163000 |
| C | 9.574943000  | 12.260081000 | 0.050495000  |
| C | 9.040170000  | 12.584164000 | 1.398539000  |
| C | 9.918337000  | 11.771432000 | 2.368641000  |
| C | 9.056352000  | 14.078495000 | 1.715479000  |
| H | 8.515569000  | 14.609366000 | 0.924324000  |
| H | 8.525416000  | 14.259591000 | 2.655623000  |
| C | 10.476838000 | 14.604616000 | 1.823045000  |
| H | 10.941027000 | 14.646889000 | 0.820539000  |
| H | 10.468467000 | 15.627287000 | 2.211404000  |
| C | 12.545963000 | 14.354502000 | 3.012407000  |
| H | 12.412812000 | 15.331275000 | 3.481600000  |
| H | 13.162855000 | 14.498604000 | 2.110364000  |
| H | 13.093986000 | 13.712774000 | 3.705014000  |
| C | 8.042682000  | 10.336784000 | -4.031461000 |
| H | 7.088765000  | 10.042437000 | -4.461553000 |
| H | 8.693652000  | 9.462028000  | -3.948256000 |
| H | 8.517848000  | 11.083522000 | -4.673436000 |
| C | 5.799828000  | 9.628326000  | 0.921070000  |
| H | 5.043499000  | 8.886870000  | 1.179933000  |
| H | 6.611229000  | 9.142599000  | 0.374690000  |

|   |              |              |             |
|---|--------------|--------------|-------------|
| H | 5.364539000  | 10.391772000 | 0.276888000 |
| C | 9.883656000  | 10.336442000 | 1.924418000 |
| C | 8.653913000  | 9.797005000  | 1.824036000 |
| C | 7.630391000  | 10.141080000 | 4.783240000 |
| H | 9.066482000  | 9.106324000  | 3.999594000 |
| H | 8.466590000  | 8.771383000  | 1.521761000 |
| H | 10.792306000 | 9.781255000  | 1.705399000 |
| C | 6.373207000  | 9.276710000  | 4.698536000 |
| H | 6.464684000  | 8.593150000  | 3.859890000 |
| H | 6.297446000  | 8.692357000  | 5.615278000 |
| H | 5.471295000  | 9.869859000  | 4.561570000 |
| C | 7.560806000  | 10.868694000 | 6.141283000 |
| F | 6.463202000  | 11.646642000 | 6.199060000 |
| F | 7.488503000  | 10.002768000 | 7.157954000 |
| F | 8.610028000  | 11.661866000 | 6.390245000 |

**15a** conformer  $g^J E_{\text{tot}} = -1583.634365629981$  a.u.

|   |              |              |              |
|---|--------------|--------------|--------------|
| O | 8.236443000  | 11.121297000 | 5.988562000  |
| O | 6.260371000  | 10.304915000 | 2.402164000  |
| O | 7.526788000  | 11.129564000 | -2.719756000 |
| O | 7.329405000  | 11.835593000 | 0.004299000  |
| N | 11.494643000 | 13.547402000 | 2.692250000  |
| C | 11.066924000 | 11.638123000 | -1.677722000 |
| H | 12.064761000 | 11.455013000 | -2.065552000 |
| C | 9.966018000  | 11.391429000 | -2.510471000 |
| H | 10.149492000 | 11.068602000 | -3.527371000 |
| C | 8.648575000  | 11.473755000 | -2.034137000 |
| C | 8.490829000  | 11.889953000 | -0.711416000 |
| C | 7.676552000  | 12.069152000 | 1.402355000  |
| H | 6.965000000  | 12.815754000 | 1.770142000  |
| C | 7.567204000  | 10.807323000 | 2.286801000  |
| C | 7.965490000  | 11.336808000 | 3.701110000  |
| H | 7.423000000  | 12.278961000 | 3.837195000  |
| C | 9.482445000  | 11.643472000 | 3.743727000  |
| H | 10.019080000 | 10.889487000 | 4.323695000  |
| H | 9.666037000  | 12.600736000 | 4.230053000  |
| C | 11.456786000 | 12.182058000 | 2.159767000  |
| H | 12.118173000 | 11.585975000 | 2.801985000  |
| C | 11.975784000 | 12.060723000 | 0.692017000  |
| H | 12.705931000 | 12.857142000 | 0.511010000  |
| H | 12.535350000 | 11.124138000 | 0.591420000  |
| C | 10.890284000 | 12.059760000 | -0.357142000 |
| C | 9.579170000  | 12.274865000 | 0.041869000  |
| C | 9.135970000  | 12.555644000 | 1.435241000  |
| C | 10.026648000 | 11.644451000 | 2.309432000  |
| C | 9.262267000  | 14.023059000 | 1.841160000  |
| H | 8.695749000  | 14.638322000 | 1.133726000  |
| H | 8.818328000  | 14.162862000 | 2.832784000  |
| C | 10.715488000 | 14.463457000 | 1.870907000  |
| H | 11.109115000 | 14.532373000 | 0.840083000  |
| H | 10.795049000 | 15.463011000 | 2.308591000  |
| C | 12.845926000 | 14.035968000 | 2.890907000  |
| H | 12.805135000 | 14.990369000 | 3.419726000  |
| H | 13.404192000 | 14.196743000 | 1.954142000  |
| H | 13.403451000 | 13.326246000 | 3.505450000  |
| C | 7.721716000  | 10.679350000 | -4.051056000 |
| H | 6.729564000  | 10.459472000 | -4.437242000 |

|   |              |              |              |
|---|--------------|--------------|--------------|
| H | 8.334657000  | 9.774104000  | -4.076982000 |
| H | 8.189816000  | 11.453490000 | -4.665367000 |
| C | 5.613110000  | 9.897116000  | 1.199935000  |
| H | 4.777545000  | 9.273065000  | 1.514731000  |
| H | 6.279961000  | 9.319653000  | 0.554674000  |
| H | 5.243875000  | 10.753059000 | 0.634240000  |
| C | 9.851090000  | 10.238202000 | 1.812799000  |
| C | 8.580703000  | 9.803193000  | 1.813293000  |
| C | 7.574438000  | 10.460362000 | 4.910984000  |
| H | 7.969905000  | 10.682392000 | 6.808826000  |
| H | 8.281933000  | 8.803905000  | 1.516274000  |
| H | 10.693232000 | 9.621592000  | 1.510231000  |
| C | 8.016281000  | 9.009556000  | 4.808322000  |
| H | 9.093164000  | 8.965255000  | 4.653104000  |
| H | 7.776367000  | 8.482649000  | 5.735977000  |
| H | 7.513042000  | 8.505415000  | 3.984817000  |
| C | 6.061205000  | 10.485308000 | 5.265335000  |
| F | 5.343433000  | 9.516171000  | 4.699201000  |
| F | 5.927011000  | 10.286380000 | 6.604663000  |
| F | 5.477650000  | 11.655137000 | 4.996806000  |

**15a** conformer  $g^2$  without H-bond  $E_{\text{tot}} = -1583.628980541434$  a.u.

|   |              |              |              |
|---|--------------|--------------|--------------|
| O | 5.956413000  | 10.860856000 | 4.981651000  |
| O | 6.029165000  | 10.635532000 | 2.306857000  |
| O | 7.321708000  | 11.570108000 | -2.744516000 |
| O | 7.271211000  | 12.135222000 | 0.018456000  |
| N | 11.670452000 | 13.117941000 | 2.693910000  |
| C | 10.917320000 | 11.542446000 | -1.767047000 |
| H | 11.874352000 | 11.250674000 | -2.189807000 |
| C | 9.778073000  | 11.491998000 | -2.583366000 |
| H | 9.898877000  | 11.205881000 | -3.620437000 |
| C | 8.492039000  | 11.721699000 | -2.070162000 |
| C | 8.414998000  | 12.077403000 | -0.722805000 |
| C | 7.672399000  | 12.231073000 | 1.418558000  |
| H | 7.070033000  | 13.038316000 | 1.848029000  |
| C | 7.396323000  | 10.939613000 | 2.227047000  |
| C | 7.894161000  | 11.332674000 | 3.667016000  |
| H | 7.479097000  | 12.334557000 | 3.843541000  |
| C | 9.440869000  | 11.435523000 | 3.681050000  |
| H | 9.890038000  | 10.577215000 | 4.183229000  |
| H | 9.765497000  | 12.333080000 | 4.209838000  |
| C | 11.442409000 | 11.803177000 | 2.084162000  |
| H | 12.029788000 | 11.087423000 | 2.674045000  |
| C | 11.915740000 | 11.703615000 | 0.599378000  |
| H | 12.741926000 | 12.406646000 | 0.446239000  |
| H | 12.344533000 | 10.709340000 | 0.432514000  |
| C | 10.822430000 | 11.907418000 | -0.421394000 |
| C | 9.559085000  | 12.269085000 | 0.021920000  |
| C | 9.180911000  | 12.521647000 | 1.439434000  |
| C | 9.955546000  | 11.451671000 | 2.236409000  |
| C | 9.508455000  | 13.934054000 | 1.920764000  |
| H | 9.019006000  | 14.657441000 | 1.259644000  |
| H | 9.100967000  | 14.076860000 | 2.927790000  |
| C | 11.007646000 | 14.175634000 | 1.942409000  |
| H | 11.391692000 | 14.249932000 | 0.908568000  |
| H | 11.227631000 | 15.129029000 | 2.432127000  |
| C | 13.078834000 | 13.413773000 | 2.881249000  |

|   |              |              |              |
|---|--------------|--------------|--------------|
| H | 13.175189000 | 14.330450000 | 3.466693000  |
| H | 13.631992000 | 13.560207000 | 1.939408000  |
| H | 13.552622000 | 12.600491000 | 3.434647000  |
| C | 7.432605000  | 11.157841000 | -4.097941000 |
| H | 6.414028000  | 11.089951000 | -4.471558000 |
| H | 7.917954000  | 10.180899000 | -4.175288000 |
| H | 7.991055000  | 11.888694000 | -4.689492000 |
| C | 5.375829000  | 10.298503000 | 1.086708000  |
| H | 4.480771000  | 9.748792000  | 1.376094000  |
| H | 5.997156000  | 9.666109000  | 0.447591000  |
| H | 5.097127000  | 11.187538000 | 0.519839000  |
| C | 9.584516000  | 10.109912000 | 1.673032000  |
| C | 8.268960000  | 9.841388000  | 1.683084000  |
| C | 7.337881000  | 10.559180000 | 4.883897000  |
| H | 5.654295000  | 10.536534000 | 5.842815000  |
| H | 7.845797000  | 8.898093000  | 1.360425000  |
| H | 10.334093000 | 9.403099000  | 1.327856000  |
| C | 8.042562000  | 11.051047000 | 6.150917000  |
| H | 7.962508000  | 12.138169000 | 6.186137000  |
| H | 7.549087000  | 10.640013000 | 7.033472000  |
| H | 9.093280000  | 10.769829000 | 6.190013000  |
| C | 7.476172000  | 9.029059000  | 4.828434000  |
| F | 8.759799000  | 8.633341000  | 4.772048000  |
| F | 6.958762000  | 8.496075000  | 5.960781000  |
| F | 6.833882000  | 8.455561000  | 3.816653000  |

**15a** conformer  $g^2$  with  $H$ -bond  $E_{\text{tot}} = -1583.642528197173$  a.u.

|   |              |              |              |
|---|--------------|--------------|--------------|
| O | 5.929701000  | 10.751954000 | 4.963787000  |
| O | 6.034995000  | 10.653275000 | 2.316971000  |
| O | 7.311260000  | 11.577222000 | -2.735050000 |
| O | 7.273594000  | 12.147587000 | 0.028312000  |
| N | 11.690966000 | 13.112871000 | 2.683000000  |
| C | 10.910164000 | 11.526991000 | -1.770021000 |
| H | 11.863836000 | 11.229326000 | -2.196108000 |
| C | 9.767850000  | 11.482552000 | -2.582311000 |
| H | 9.883669000  | 11.194370000 | -3.619338000 |
| C | 8.484865000  | 11.721024000 | -2.065104000 |
| C | 8.416146000  | 12.079029000 | -0.718376000 |
| C | 7.683199000  | 12.242810000 | 1.424381000  |
| H | 7.088707000  | 13.053332000 | 1.858593000  |
| C | 7.417396000  | 10.955005000 | 2.233008000  |
| C | 7.912437000  | 11.337321000 | 3.673230000  |
| H | 7.491729000  | 12.335845000 | 3.857849000  |
| C | 9.456050000  | 11.453052000 | 3.688774000  |
| H | 9.912433000  | 10.612288000 | 4.211851000  |
| H | 9.768032000  | 12.364463000 | 4.200571000  |
| C | 11.454742000 | 11.797641000 | 2.079301000  |
| H | 12.040733000 | 11.080820000 | 2.668911000  |
| C | 11.920312000 | 11.690504000 | 0.592185000  |
| H | 12.747279000 | 12.391199000 | 0.432744000  |
| H | 12.346160000 | 10.694828000 | 0.426405000  |
| C | 10.823190000 | 11.894531000 | -0.424525000 |
| C | 9.563456000  | 12.263795000 | 0.022697000  |
| C | 9.194172000  | 12.524104000 | 1.440889000  |
| C | 9.967517000  | 11.453889000 | 2.241309000  |
| C | 9.529956000  | 13.937213000 | 1.914439000  |
| H | 9.042650000  | 14.660027000 | 1.251121000  |

|   |              |              |              |
|---|--------------|--------------|--------------|
| H | 9.125875000  | 14.087020000 | 2.921668000  |
| C | 11.030681000 | 14.171117000 | 1.930857000  |
| H | 11.411888000 | 14.241358000 | 0.895630000  |
| H | 11.256069000 | 15.124838000 | 2.417268000  |
| C | 13.100971000 | 13.402020000 | 2.867827000  |
| H | 13.202886000 | 14.318770000 | 3.452078000  |
| H | 13.653447000 | 13.543933000 | 1.924889000  |
| H | 13.570996000 | 12.587135000 | 3.421976000  |
| C | 7.415190000  | 11.180257000 | -4.094040000 |
| H | 6.395119000  | 11.123908000 | -4.465381000 |
| H | 7.893488000  | 10.201098000 | -4.184779000 |
| H | 7.976850000  | 11.914699000 | -4.677897000 |
| C | 5.365272000  | 10.312517000 | 1.100231000  |
| H | 4.476640000  | 9.756289000  | 1.395185000  |
| H | 5.991839000  | 9.687091000  | 0.462649000  |
| H | 5.083441000  | 11.205325000 | 0.543189000  |
| C | 9.589841000  | 10.111938000 | 1.683101000  |
| C | 8.273234000  | 9.848917000  | 1.687304000  |
| C | 7.323623000  | 10.543381000 | 4.865385000  |
| H | 5.588411000  | 10.658546000 | 4.054155000  |
| H | 7.845933000  | 8.905859000  | 1.370308000  |
| H | 10.335303000 | 9.398423000  | 1.343524000  |
| C | 7.917399000  | 11.080388000 | 6.161663000  |
| H | 7.822104000  | 12.166720000 | 6.163912000  |
| H | 7.350931000  | 10.682549000 | 7.002318000  |
| H | 8.966910000  | 10.813247000 | 6.278057000  |
| C | 7.548460000  | 9.021413000  | 4.832279000  |
| F | 8.848323000  | 8.686509000  | 4.714073000  |
| F | 7.109459000  | 8.460232000  | 5.967912000  |
| F | 6.895013000  | 8.420615000  | 3.828543000  |

**15b** conformer  $t E_{\text{tot}} = -1583.633543192024$  a.u.

|   |              |              |              |
|---|--------------|--------------|--------------|
| O | 8.740884000  | 9.269341000  | 4.822087000  |
| O | 6.194702000  | 10.256742000 | 2.075433000  |
| O | 7.739278000  | 10.920196000 | -2.778779000 |
| O | 7.330259000  | 11.769204000 | -0.104975000 |
| N | 11.213439000 | 13.793097000 | 2.753998000  |
| C | 11.181937000 | 11.642608000 | -1.541562000 |
| H | 12.208863000 | 11.488828000 | -1.860114000 |
| C | 10.146252000 | 11.302359000 | -2.424363000 |
| H | 10.409372000 | 10.936042000 | -3.408530000 |
| C | 8.795804000  | 11.349573000 | -2.040306000 |
| C | 8.532957000  | 11.825109000 | -0.754799000 |
| C | 7.609360000  | 12.029274000 | 1.305572000  |
| H | 6.827778000  | 12.715519000 | 1.645444000  |
| C | 7.511641000  | 10.743991000 | 2.163535000  |
| C | 7.773807000  | 11.218028000 | 3.634621000  |
| H | 7.012300000  | 11.981985000 | 3.833777000  |
| C | 9.200862000  | 11.840580000 | 3.734029000  |
| H | 9.803391000  | 11.274336000 | 4.446693000  |
| H | 9.161136000  | 12.870910000 | 4.086950000  |
| C | 11.291032000 | 12.405608000 | 2.288292000  |
| H | 11.942065000 | 11.879603000 | 2.998205000  |
| C | 11.912033000 | 12.247394000 | 0.859213000  |
| H | 12.597468000 | 13.083963000 | 0.684636000  |
| H | 12.540307000 | 11.350010000 | 0.844049000  |
| C | 10.902305000 | 12.122802000 | -0.258733000 |

|   |              |              |              |
|---|--------------|--------------|--------------|
| C | 9.559285000  | 12.288223000 | 0.040494000  |
| C | 9.018859000  | 12.608498000 | 1.386074000  |
| C | 9.887749000  | 11.789845000 | 2.362746000  |
| C | 9.036516000  | 14.102322000 | 1.706266000  |
| H | 8.503344000  | 14.635920000 | 0.911992000  |
| H | 8.497869000  | 14.283928000 | 2.641955000  |
| C | 10.457350000 | 14.624577000 | 1.826823000  |
| H | 10.930834000 | 14.665207000 | 0.828905000  |
| H | 10.449635000 | 15.646976000 | 2.216001000  |
| C | 12.518796000 | 14.366204000 | 3.026403000  |
| H | 12.387514000 | 15.342715000 | 3.496726000  |
| H | 13.137974000 | 14.509857000 | 2.126073000  |
| H | 13.063382000 | 13.721269000 | 3.718813000  |
| C | 8.044945000  | 10.402156000 | -4.064698000 |
| H | 7.092038000  | 10.116227000 | -4.502577000 |
| H | 8.694520000  | 9.525348000  | -3.993567000 |
| H | 8.523152000  | 11.159489000 | -4.691842000 |
| C | 5.926729000  | 9.312568000  | 1.044177000  |
| H | 4.842300000  | 9.276734000  | 0.953792000  |
| H | 6.284918000  | 8.316751000  | 1.319205000  |
| H | 6.357608000  | 9.619675000  | 0.090068000  |
| C | 9.855578000  | 10.359510000 | 1.905123000  |
| C | 8.629480000  | 9.815993000  | 1.785134000  |
| C | 7.648635000  | 10.172646000 | 4.781715000  |
| C | 7.666697000  | 10.930010000 | 6.106970000  |
| H | 6.738047000  | 11.486467000 | 6.241970000  |
| H | 7.783626000  | 10.226122000 | 6.928756000  |
| H | 8.501774000  | 11.627139000 | 6.127278000  |
| C | 6.373568000  | 9.307119000  | 4.785891000  |
| F | 5.258841000  | 10.031416000 | 4.632355000  |
| F | 6.397785000  | 8.342188000  | 3.855777000  |
| F | 6.255164000  | 8.670229000  | 5.966464000  |
| H | 8.919736000  | 8.987902000  | 3.910302000  |
| H | 8.456788000  | 8.801461000  | 1.444113000  |
| H | 10.765626000 | 9.812297000  | 1.673472000  |

**15b** conformer  $g^I$   $E_{\text{tot}} = -1583.633759368920$  a.u.

|   |              |              |              |
|---|--------------|--------------|--------------|
| O | 8.018324000  | 11.126221000 | 6.102852000  |
| O | 6.183640000  | 10.387796000 | 2.299538000  |
| O | 7.505004000  | 11.190414000 | -2.725604000 |
| O | 7.308225000  | 11.874347000 | 0.008104000  |
| N | 11.482435000 | 13.523119000 | 2.720029000  |
| C | 11.048601000 | 11.653718000 | -1.672217000 |
| H | 12.044963000 | 11.464333000 | -2.060837000 |
| C | 9.946102000  | 11.425676000 | -2.508433000 |
| H | 10.128271000 | 11.110588000 | -3.528022000 |
| C | 8.628163000  | 11.516210000 | -2.034014000 |
| C | 8.471287000  | 11.920742000 | -0.707458000 |
| C | 7.665591000  | 12.084584000 | 1.406835000  |
| H | 6.953536000  | 12.823595000 | 1.787423000  |
| C | 7.530630000  | 10.807886000 | 2.270601000  |
| C | 7.926744000  | 11.321996000 | 3.700538000  |
| H | 7.396459000  | 12.276179000 | 3.820973000  |
| C | 9.446082000  | 11.635893000 | 3.743554000  |
| H | 10.001173000 | 10.877566000 | 4.302230000  |
| H | 9.626944000  | 12.600997000 | 4.218892000  |
| C | 11.435569000 | 12.163164000 | 2.173210000  |

|   |              |              |              |
|---|--------------|--------------|--------------|
| H | 12.091044000 | 11.555026000 | 2.810264000  |
| C | 11.955940000 | 12.050169000 | 0.704723000  |
| H | 12.692292000 | 12.842851000 | 0.532542000  |
| H | 12.509206000 | 11.110529000 | 0.598635000  |
| C | 10.873646000 | 12.065676000 | -0.348296000 |
| C | 9.563901000  | 12.288514000 | 0.049237000  |
| C | 9.121905000  | 12.563556000 | 1.443132000  |
| C | 10.000482000 | 11.637999000 | 2.313060000  |
| C | 9.259374000  | 14.027212000 | 1.858556000  |
| H | 8.702942000  | 14.651540000 | 1.151180000  |
| H | 8.808942000  | 14.166872000 | 2.847553000  |
| C | 10.716349000 | 14.453601000 | 1.901085000  |
| H | 11.117317000 | 14.525487000 | 0.873544000  |
| H | 10.803551000 | 15.448988000 | 2.346602000  |
| C | 12.838140000 | 13.997858000 | 2.926954000  |
| H | 12.804490000 | 14.946559000 | 3.466302000  |
| H | 13.398707000 | 14.163835000 | 1.992848000  |
| H | 13.388402000 | 13.276256000 | 3.534114000  |
| C | 7.697194000  | 10.761643000 | -4.064794000 |
| H | 6.703411000  | 10.558450000 | -4.455668000 |
| H | 8.301310000  | 9.851199000  | -4.106100000 |
| H | 8.173382000  | 11.542451000 | -4.664207000 |
| C | 5.765782000  | 9.521204000  | 1.247065000  |
| H | 4.677450000  | 9.563086000  | 1.244506000  |
| H | 6.076573000  | 8.491142000  | 1.442216000  |
| H | 6.140056000  | 9.849735000  | 0.276924000  |
| C | 9.813531000  | 10.237801000 | 1.808920000  |
| C | 8.543281000  | 9.803330000  | 1.800524000  |
| C | 7.443923000  | 10.529405000 | 4.944667000  |
| C | 5.943502000  | 10.633304000 | 5.171907000  |
| H | 5.388351000  | 10.076370000 | 4.423933000  |
| H | 5.711414000  | 10.265958000 | 6.170866000  |
| H | 5.655672000  | 11.682999000 | 5.113170000  |
| C | 7.833726000  | 9.044177000  | 4.967269000  |
| F | 7.306852000  | 8.353135000  | 3.947516000  |
| F | 9.169384000  | 8.862948000  | 4.919968000  |
| F | 7.413147000  | 8.461439000  | 6.097002000  |
| H | 8.980750000  | 11.129052000 | 5.997927000  |
| H | 8.261327000  | 8.806502000  | 1.489424000  |
| H | 10.651510000 | 9.619201000  | 1.500261000  |

**15b** conformer  $g^2$  with  $H$ -bond  $E_{\text{tot}} = -1583.633662566085$  a.u.

|   |              |              |              |
|---|--------------|--------------|--------------|
| O | 5.961618000  | 10.916141000 | 4.972175000  |
| O | 6.052625000  | 10.521660000 | 2.319997000  |
| O | 7.316691000  | 11.543498000 | -2.717418000 |
| O | 7.259738000  | 12.100820000 | 0.039318000  |
| N | 11.643709000 | 13.119591000 | 2.732936000  |
| C | 10.912841000 | 11.570860000 | -1.744917000 |
| H | 11.874380000 | 11.294991000 | -2.168082000 |
| C | 9.774764000  | 11.504125000 | -2.561827000 |
| H | 9.899784000  | 11.221397000 | -3.599344000 |
| C | 8.486513000  | 11.713758000 | -2.046701000 |
| C | 8.405964000  | 12.065987000 | -0.698998000 |
| C | 7.653778000  | 12.190151000 | 1.440205000  |
| H | 7.040143000  | 12.985490000 | 1.875005000  |
| C | 7.407951000  | 10.891020000 | 2.242061000  |
| C | 7.902459000  | 11.304278000 | 3.682282000  |



|   |              |              |              |
|---|--------------|--------------|--------------|
| H | 7.507308000  | 12.312993000 | 3.852514000  |
| C | 9.446800000  | 11.371563000 | 3.697833000  |
| H | 9.879128000  | 10.482618000 | 4.161241000  |
| H | 9.790272000  | 12.236531000 | 4.266869000  |
| C | 11.437968000 | 11.811454000 | 2.104283000  |
| H | 12.036104000 | 11.096639000 | 2.684353000  |
| C | 11.913387000 | 11.743056000 | 0.618119000  |
| H | 12.717583000 | 12.473110000 | 0.474542000  |
| H | 12.372187000 | 10.764919000 | 0.436544000  |
| C | 10.813606000 | 11.930710000 | -0.398134000 |
| C | 9.545386000  | 12.272663000 | 0.049069000  |
| C | 9.161782000  | 12.501776000 | 1.470575000  |
| C | 9.957445000  | 11.432722000 | 2.251025000  |
| C | 9.466377000  | 13.909639000 | 1.978922000  |
| H | 8.961076000  | 14.638367000 | 1.335898000  |
| H | 9.062678000  | 14.022440000 | 2.991222000  |
| C | 10.960988000 | 14.176969000 | 2.000094000  |
| H | 11.341217000 | 14.275199000 | 0.966613000  |
| H | 11.165163000 | 15.125884000 | 2.504849000  |
| C | 13.046270000 | 13.436605000 | 2.926876000  |
| H | 13.126233000 | 14.343090000 | 3.530190000  |
| H | 13.597083000 | 13.610679000 | 1.988168000  |
| H | 13.533988000 | 12.621434000 | 3.465130000  |
| C | 7.428919000  | 11.129376000 | -4.069998000 |
| H | 6.410106000  | 11.044093000 | -4.439508000 |
| H | 7.929558000  | 10.160078000 | -4.146664000 |
| H | 7.973089000  | 11.867350000 | -4.665877000 |
| C | 5.394954000  | 10.254946000 | 1.083375000  |
| H | 4.511073000  | 9.672367000  | 1.341651000  |
| H | 6.022593000  | 9.680488000  | 0.397004000  |
| H | 5.094879000  | 11.175253000 | 0.581705000  |
| C | 9.608320000  | 10.094763000 | 1.667540000  |
| C | 8.296525000  | 9.810684000  | 1.688415000  |
| C | 7.299982000  | 10.471098000 | 4.827363000  |
| C | 7.384643000  | 8.967199000  | 4.611700000  |
| H | 8.405224000  | 8.650249000  | 4.396452000  |
| H | 7.040612000  | 8.434528000  | 5.502031000  |
| H | 6.742333000  | 8.708557000  | 3.772262000  |
| C | 7.978635000  | 10.818121000 | 6.169879000  |
| F | 9.181592000  | 10.246003000 | 6.333808000  |
| F | 8.131332000  | 12.135991000 | 6.338645000  |
| F | 7.215387000  | 10.376408000 | 7.191609000  |
| H | 5.533107000  | 10.348288000 | 5.628417000  |
| H | 7.877726000  | 8.869333000  | 1.349988000  |
| H | 10.365501000 | 9.404501000  | 1.305292000  |

**15b** conformer  $g^2$  without H-bond  $E_{\text{tot}} = -1583.642354540677$  a.u.

|   |              |              |              |
|---|--------------|--------------|--------------|
| O | 5.921811000  | 10.810218000 | 4.962633000  |
| O | 6.027496000  | 10.692876000 | 2.333797000  |
| O | 7.269862000  | 11.662946000 | -2.683838000 |
| O | 7.261035000  | 12.196664000 | 0.082421000  |
| N | 11.709305000 | 13.081602000 | 2.723976000  |
| C | 10.878462000 | 11.590238000 | -1.758464000 |
| H | 11.826890000 | 11.295643000 | -2.198172000 |
| C | 9.728328000  | 11.561217000 | -2.560331000 |
| H | 9.832699000  | 11.287689000 | -3.602563000 |
| C | 8.451870000  | 11.796838000 | -2.026361000 |

|   |              |              |              |
|---|--------------|--------------|--------------|
| C | 8.397832000  | 12.136862000 | -0.674546000 |
| C | 7.685608000  | 12.265184000 | 1.474645000  |
| H | 7.095153000  | 13.066894000 | 1.928042000  |
| C | 7.422167000  | 10.968380000 | 2.267880000  |
| C | 7.930531000  | 11.351488000 | 3.707013000  |
| H | 7.554309000  | 12.364994000 | 3.890873000  |
| C | 9.475317000  | 11.392379000 | 3.708315000  |
| H | 9.894058000  | 10.498793000 | 4.175079000  |
| H | 9.836166000  | 12.252543000 | 4.273876000  |
| C | 11.461480000 | 11.784554000 | 2.089140000  |
| H | 12.049299000 | 11.050065000 | 2.654765000  |
| C | 11.913507000 | 11.714019000 | 0.594811000  |
| H | 12.735718000 | 12.422475000 | 0.445523000  |
| H | 12.342909000 | 10.725009000 | 0.400421000  |
| C | 10.806433000 | 11.938465000 | -0.406767000 |
| C | 9.552898000  | 12.306725000 | 0.059503000  |
| C | 9.198035000  | 12.538410000 | 1.487086000  |
| C | 9.974045000  | 11.444339000 | 2.255594000  |
| C | 9.545410000  | 13.934883000 | 1.999441000  |
| H | 9.053563000  | 14.680506000 | 1.365504000  |
| H | 9.154506000  | 14.052430000 | 3.016119000  |
| C | 11.046933000 | 14.162282000 | 2.007190000  |
| H | 11.419081000 | 14.259868000 | 0.970720000  |
| H | 11.280328000 | 15.101073000 | 2.518028000  |
| C | 13.121858000 | 13.358831000 | 2.906130000  |
| H | 13.232368000 | 14.258529000 | 3.514616000  |
| H | 13.668072000 | 13.523894000 | 1.963140000  |
| H | 13.591862000 | 12.527041000 | 3.434545000  |
| C | 7.356021000  | 11.290760000 | -4.051037000 |
| H | 6.331253000  | 11.243316000 | -4.410521000 |
| H | 7.831046000  | 10.312515000 | -4.165820000 |
| H | 7.911857000  | 12.034890000 | -4.628008000 |
| C | 5.447893000  | 10.012015000 | 1.216676000  |
| H | 4.377450000  | 10.200926000 | 1.275720000  |
| H | 5.620562000  | 8.934863000  | 1.284806000  |
| H | 5.834483000  | 10.397357000 | 0.274116000  |
| C | 9.582109000  | 10.122059000 | 1.667429000  |
| C | 8.264304000  | 9.865363000  | 1.698018000  |
| C | 7.299331000  | 10.504217000 | 4.833398000  |
| C | 7.505796000  | 9.004087000  | 4.665991000  |
| H | 8.555070000  | 8.739620000  | 4.534477000  |
| H | 7.110281000  | 8.483490000  | 5.539086000  |
| H | 6.948840000  | 8.671523000  | 3.789806000  |
| C | 7.863060000  | 10.946253000 | 6.193628000  |
| F | 9.121057000  | 10.510050000 | 6.393607000  |
| F | 7.886446000  | 12.281741000 | 6.316888000  |
| F | 7.127382000  | 10.465876000 | 7.199125000  |
| H | 5.578691000  | 10.764410000 | 4.051493000  |
| H | 7.831983000  | 8.941213000  | 1.335338000  |
| H | 10.313778000 | 9.418692000  | 1.279525000  |

## 4. Crystal structure data

### 4.1. General

Single crystals of **15b**, **17a** and **18b** were crystallized from MeOH. Suitable crystals were selected and mounted on a needle on a Bruker SMART APEX II (**15b**, **17a**), a Bruker SMART 1000 (**15b**) or a Bruker Quest D8 CMOS diffractometer (**11c**, **16b**), using graphite monochromated Mo-K $\alpha$  radiation ( $\lambda = 0.71073 \text{ \AA}$ ). Using Olex2 [10], the structures were solved with the ShelXS [11] structure solution program using Direct Methods (**15b** and **18b**) or XT [12] structure solution program using Intrinsic Phasing (**11c**, **16b**, **17a**) and refined with the ShelXL2014 [11] refinement package using Least Squares minimization against  $F^2$  in anisotropic approximation for non-hydrogen atoms. The crystal of **18b** was disordered, with the  $\text{CH}_3\text{C}(\text{O})\text{CF}_3$  group occupying two close positions with occupancies of 0.61 and 0.29. Hydrogen atoms of hydrogen groups in **16b** and **11c** were located from difference Fourier synthesis while the positions of other hydrogen atoms were calculated, and they all were refined in isotropic approximation within the riding model.

The CIF files of all studied compounds were deposited with CCDC, deposition numbers 2217268 (**11c**), 2221023 (**15b**), 2217267 (**16b**), 2221036 (**17a**), 2221027 (**18b**).

### 4.2 Crystal structure data for compounds 11c, 15b, 16b, 17a, 18b

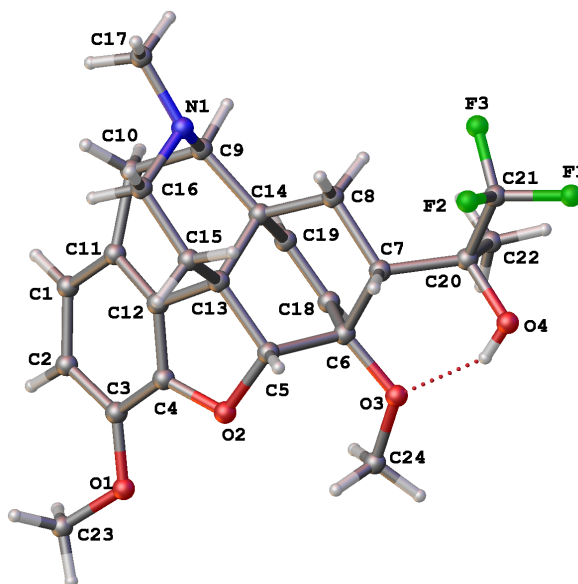

**Figure 1.** The general view of **15b** in crystal. Atoms are represented by anisotropic thermal displacement ellipsoids ( $p=50\%$ ). Based on the absolute configuration of the asymmetric centres in the parent compound, the absolute configuration of the atom C(20) was identified as S. The dotted line shows an intramolecular hydrogen bond ( $\text{O}\cdots\text{O}$  2.625(3)  $\text{\AA}$ ,  $\text{OHO}$  148(3) $^\circ$ ).

**Crystal Data** for  $C_{24}H_{28}F_3NO_4$  (**15b**) ( $M=451.47$  g/mol): orthorhombic, space group  $P2_12_12_1$  (no. 19),  $a = 9.0266(17)$  Å,  $b = 11.611(2)$  Å,  $c = 20.467(3)$  Å,  $V = 2145.1(7)$  Å<sup>3</sup>,  $Z = 4$ ,  $T = 100$  K,  $\mu(\text{MoK}\alpha) = 0.111$  mm<sup>-1</sup>,  $D_{\text{calc}} = 1.398$  g/cm<sup>3</sup>, 16410 reflections measured ( $3.98^\circ \leq 2\Theta \leq 60.054^\circ$ ), 6255 unique ( $R_{\text{int}} = 0.0476$ ,  $R_{\text{sigma}} = 0.0573$ ) which were used in all calculations. The final  $R_1$  was 0.0458 ( $I > 2\sigma(I)$ ) and  $wR_2$  was 0.1003 (all data).

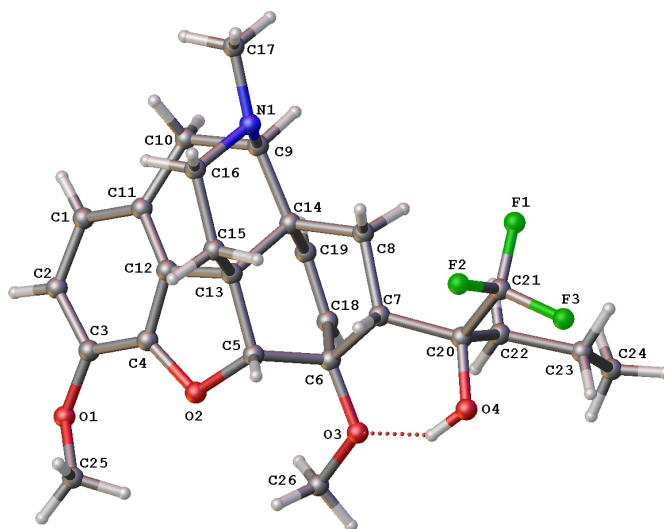

**Figure 2.** General view of the compound **18b** in representation of atoms *via* thermal ellipsoids at 50% probability level. Based on the absolute configuration of the asymmetric centres in the parent compound, the absolute configuration of the atom C(20) was identified as S. The dotted line shows an intramolecular hydrogen bond (O...O 2.671(6) Å, OHO 142.2(4)°).

**Crystal Data** for  $C_{26}H_{32}F_3NO_4$  (**18b**) ( $M=479.52$  g/mol): monoclinic, space group  $P2_1$  (no. 4),  $a = 7.0711(13)$  Å,  $b = 10.670(2)$  Å,  $c = 15.423(3)$  Å,  $\beta = 100.581(4)^\circ$ ,  $V = 1143.9(4)$  Å<sup>3</sup>,  $Z = 2$ ,  $T = 120$  K,  $\mu(\text{MoK}\alpha) = 0.109$  mm<sup>-1</sup>,  $D_{\text{calc}} = 1.392$  g/cm<sup>3</sup>, 13376 reflections measured ( $4.668^\circ \leq 2\Theta \leq 60.002^\circ$ ), 6467 unique ( $R_{\text{int}} = 0.0225$ ,  $R_{\text{sigma}} = 0.0333$ ) which were used in all calculations. The final  $R_1$  was 0.0414 ( $I > 2\sigma(I)$ ) and  $wR_2$  was 0.1102 (all data).

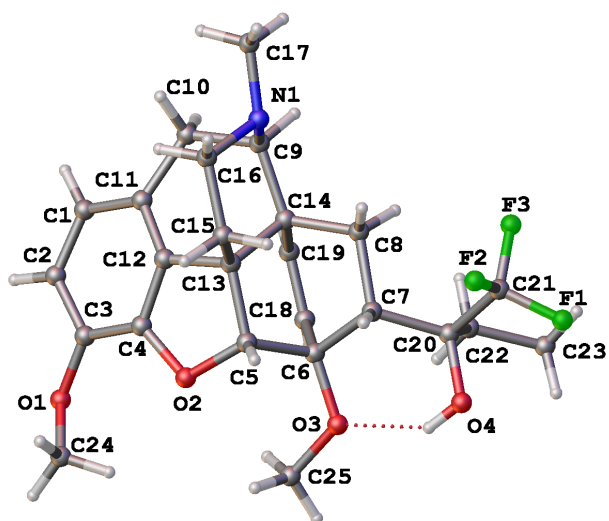

**Figure 3.** General view of the compound **16b** in representation of atoms *via* thermal ellipsoids at 50% probability level. The second symmetry-independent molecule is omitted for clarity. Based on the absolute configuration of the asymmetric centres in the parent compound, the absolute configuration of the atom C(20) was identified as *S*. The dotted line shows an intramolecular hydrogen bond (O...O 2.668(3) Å, OHO 144(5)°).

**Crystal Data** for  $C_{25}H_{30}F_3NO_4$  (**16b**) ( $M=465.50$  g/mol): monoclinic, space group  $P2_1$  (no. 4),  $a = 13.5849(3)$  Å,  $b = 10.6443(3)$  Å,  $c = 15.6105(4)$  Å,  $\beta = 100.4980(10)^\circ$ ,  $V = 2219.52(10)$  Å<sup>3</sup>,  $Z = 4$ ,  $T = 100.00$  K,  $\mu(\text{MoK}\alpha) = 0.110$  mm<sup>-1</sup>,  $D_{\text{calc}} = 1.393$  g/cm<sup>3</sup>, 33721 reflections measured ( $3.66^\circ \leq 2\theta \leq 61.15^\circ$ ), 13076 unique ( $R_{\text{int}} = 0.0721$ ,  $R_{\text{sigma}} = 0.1037$ ) which were used in all calculations. The final  $R_1$  was 0.0580 ( $I > 2\sigma(I)$ ) and  $wR_2$  was 0.1151 (all data).

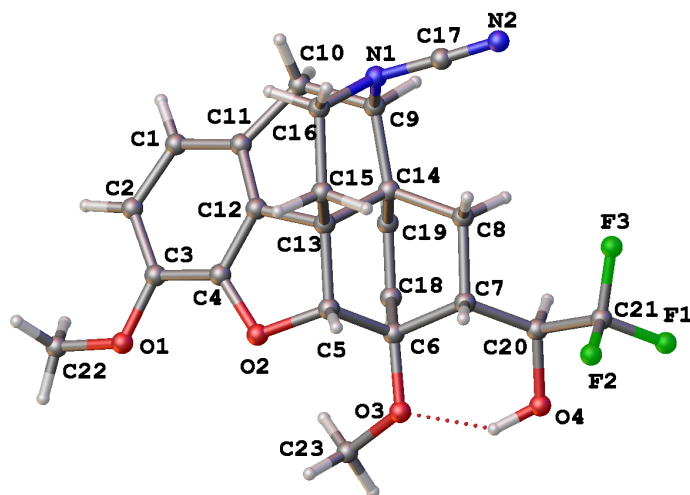

**Figure 4.** General view of the compound **11c** in representation of atoms *via* thermal ellipsoids at 50% probability level. The second symmetry-independent molecule is omitted for clarity. Based on the absolute configuration of the asymmetric centres in the parent compound, the absolute configuration of the atom C(20) was identified as *S*. The dotted line shows an intramolecular hydrogen bond (O...O 2.545(8) Å, OHO 142.3(4)°).

**Crystal Data** for  $C_{23}H_{23}F_3N_2O_4$  (**11c**) ( $M=448.43$  g/mol): monoclinic, space group  $P2_1$  (no. 4),  $a = 10.0899(7)$  Å,  $b = 7.6365(5)$  Å,  $c = 26.1261(17)$  Å,  $\beta = 98.814(3)^\circ$ ,  $V = 1989.3(2)$  Å<sup>3</sup>,  $Z = 4$ ,  $T = 100.00$  K,  $\mu(\text{MoK}\alpha) = 0.121$  mm<sup>-1</sup>,  $D_{\text{calc}} = 1.497$  g/cm<sup>3</sup>, 55164 reflections measured ( $4.084^\circ \leq 2\Theta \leq 57.992^\circ$ ), 9514 unique ( $R_{\text{int}} = 0.0592$ ,  $R_{\text{sigma}} = 0.0490$ ) which were used in all calculations. The final  $R_1$  was 0.0997 ( $I > 2\sigma(I)$ ) and  $wR_2$  was 0.2900 (all data)

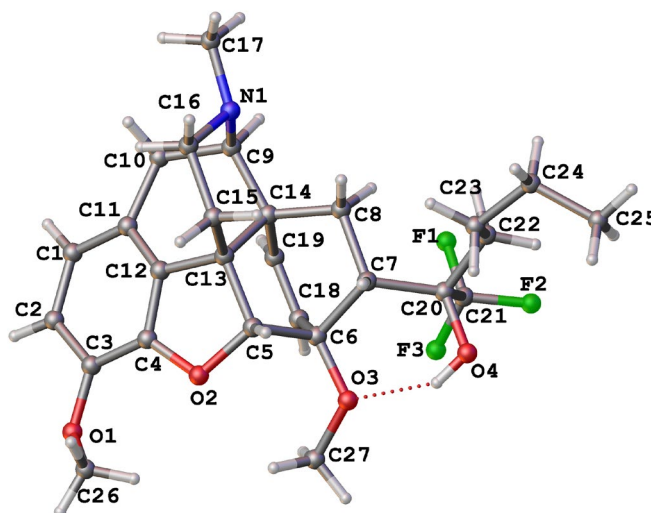

**Figure 5.** General view of the compound **17a** in representation of atoms *via* thermal ellipsoids at 50% probability level. Based on the absolute configuration of the asymmetric centres in the parent compound, the absolute configuration of the atom C(20) was identified as S. The dotted line shows an intramolecular hydrogen bond (O...O 2.622(2) Å, OHO 144.88(11)°).

**Crystal Data** for  $C_{27}H_{34}F_3NO_4$  (**17a**) ( $M=493.55$  g/mol): orthorhombic, space group  $P2_12_12_1$  (no. 19),  $a = 7.9944(2)$  Å,  $b = 11.8989(3)$  Å,  $c = 25.1140(6)$  Å,  $V = 2388.96(10)$  Å<sup>3</sup>,  $Z = 4$ ,  $T = 100$  K,  $\mu(\text{MoK}\alpha) = 0.106$  mm<sup>-1</sup>,  $D_{\text{calc}} = 1.372$  g/cm<sup>3</sup>, 25264 reflections measured ( $3.788^\circ \leq 2\Theta \leq 52^\circ$ ), 4694 unique ( $R_{\text{int}} = 0.0415$ ,  $R_{\text{sigma}} = 0.0318$ ) which were used in all calculations. The final  $R_1$  was 0.0315 ( $I > 2\sigma(I)$ ) and  $wR_2$  was 0.0779 (all data).

## 5. NMR Spectra.

### <sup>1</sup>H NMR Spectrum of (5*R*,6*R*,7*R*,20*S*)-4,5-epoxy-7-(1-hydroxy-2,2,2-trifluoroethyl)-3,6-dimethoxy-17-methyl-6,14-ethenoisomorphinan (11a)

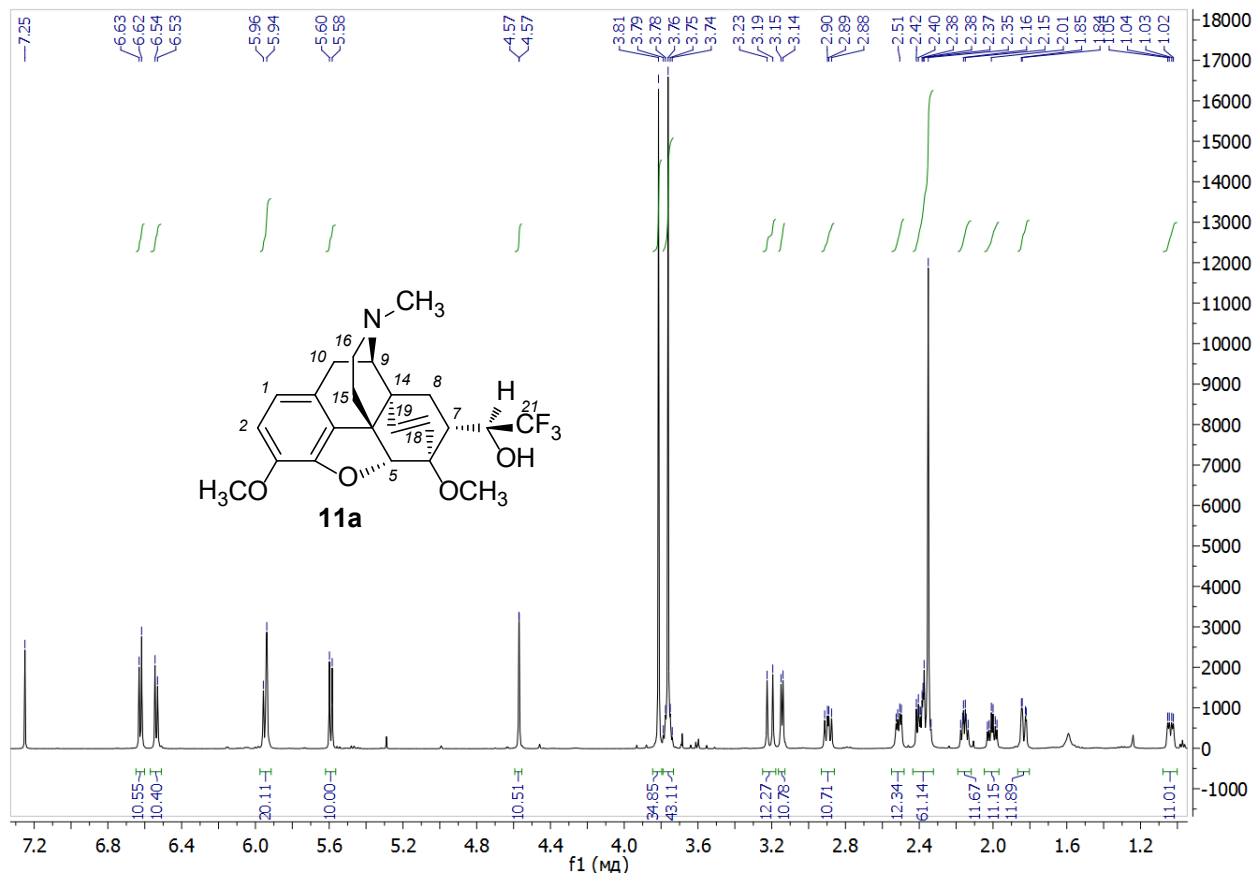

### <sup>13</sup>C (JMODECHO) NMR Spectrum of (5*R*,6*R*,7*R*,20*S*)-4,5-epoxy-7-(1-hydroxy-2,2,2-trifluoroethyl)-3,6-dimethoxy-17-methyl-6,14-ethenoisomorphinan (11a)

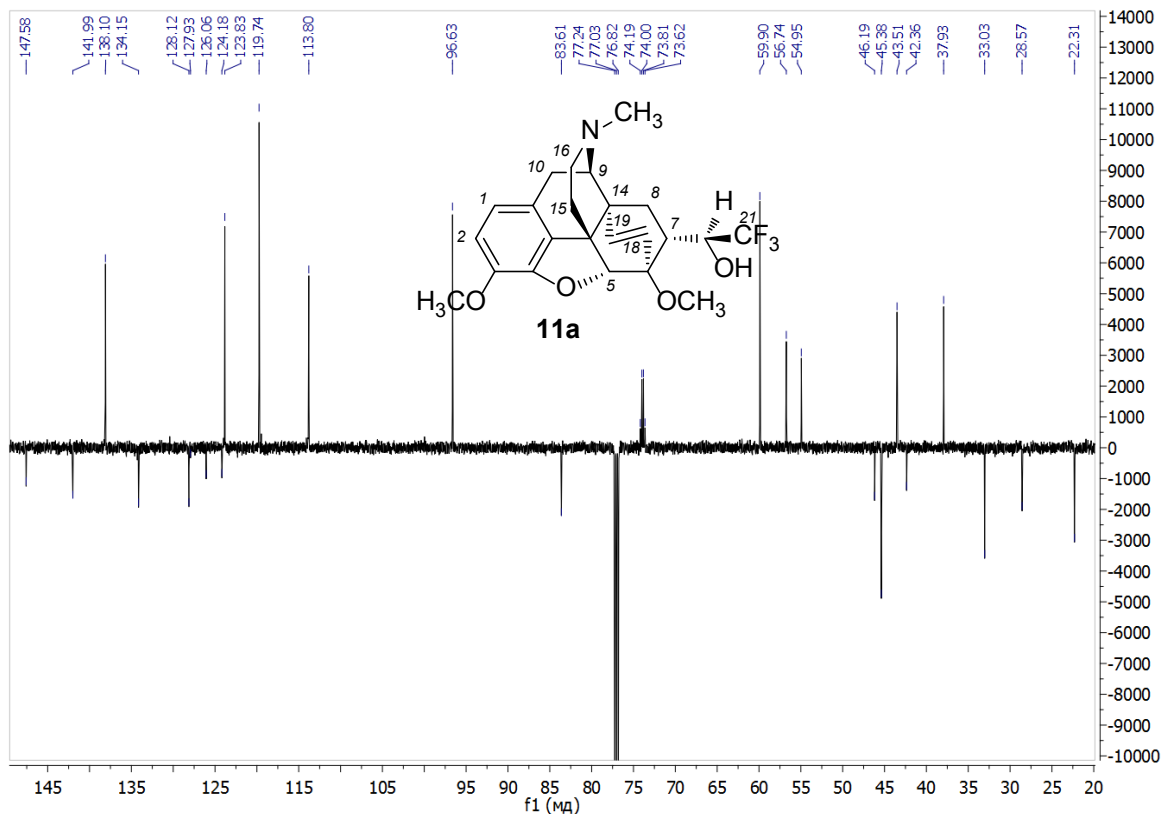

**$^{19}\text{F}\{^1\text{H}\}$  NMR Spectrum of (5*R*,6*R*,7*R*,20*S*)-4,5-epoxy-7-(1-hydroxy-2,2,2-trifluoroethyl)-3,6-dimethoxy-17-methyl-6,14-ethenoisomorphinan (11a)**

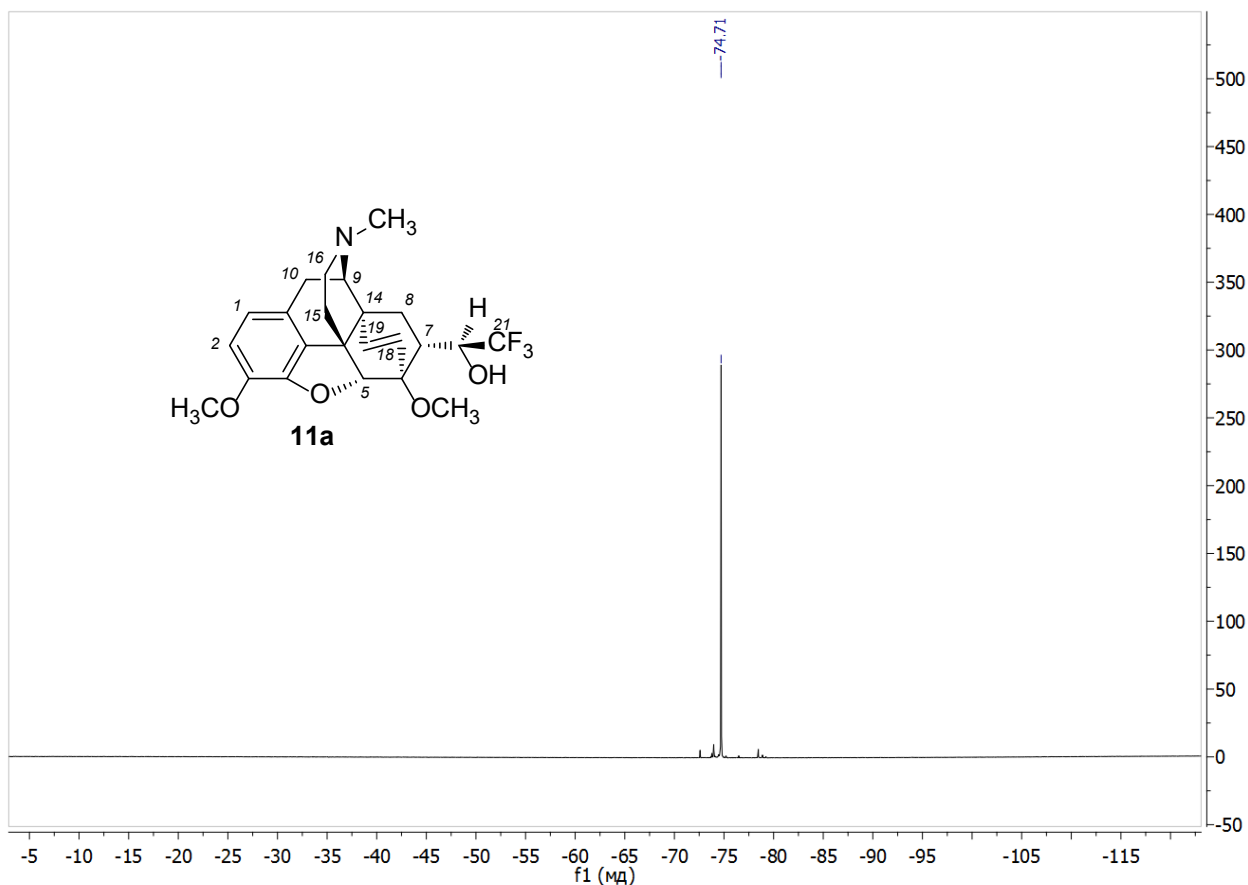

**$^1\text{H}$  NMR Spectrum of (5*R*,6*R*,7*R*,20*R*)-4,5-epoxy-7-(1-hydroxy-2,2,2-trifluoroethyl)-3,6-dimethoxy-17-methyl-6,14-ethenoisomorphinan (11b)**

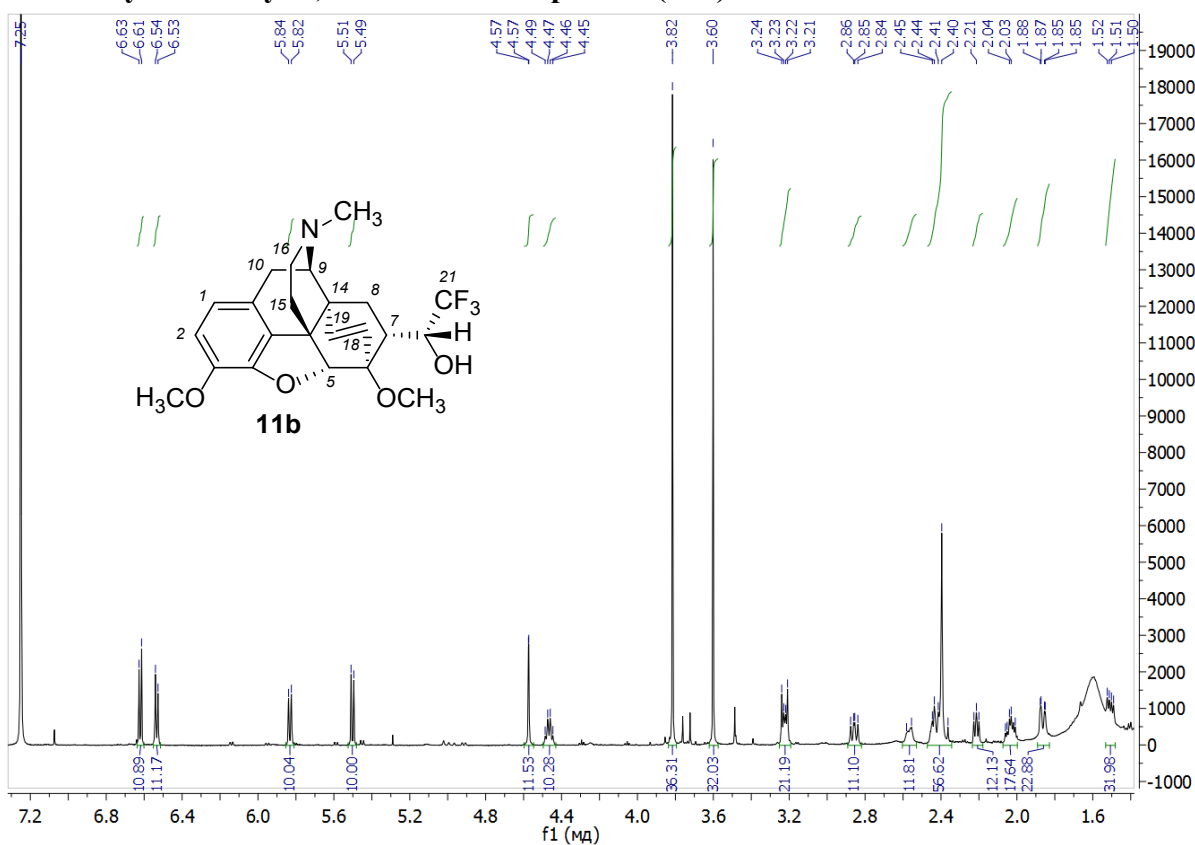



**<sup>13</sup>C NMR Spectrum of (5*R*,6*R*,7*R*,20*R*)-4,5-epoxy-7-(1-hydroxy-2,2,2-trifluoroethyl)-3,6-dimethoxy-17-methyl-6,14-ethenoisomorphinan (11b)**

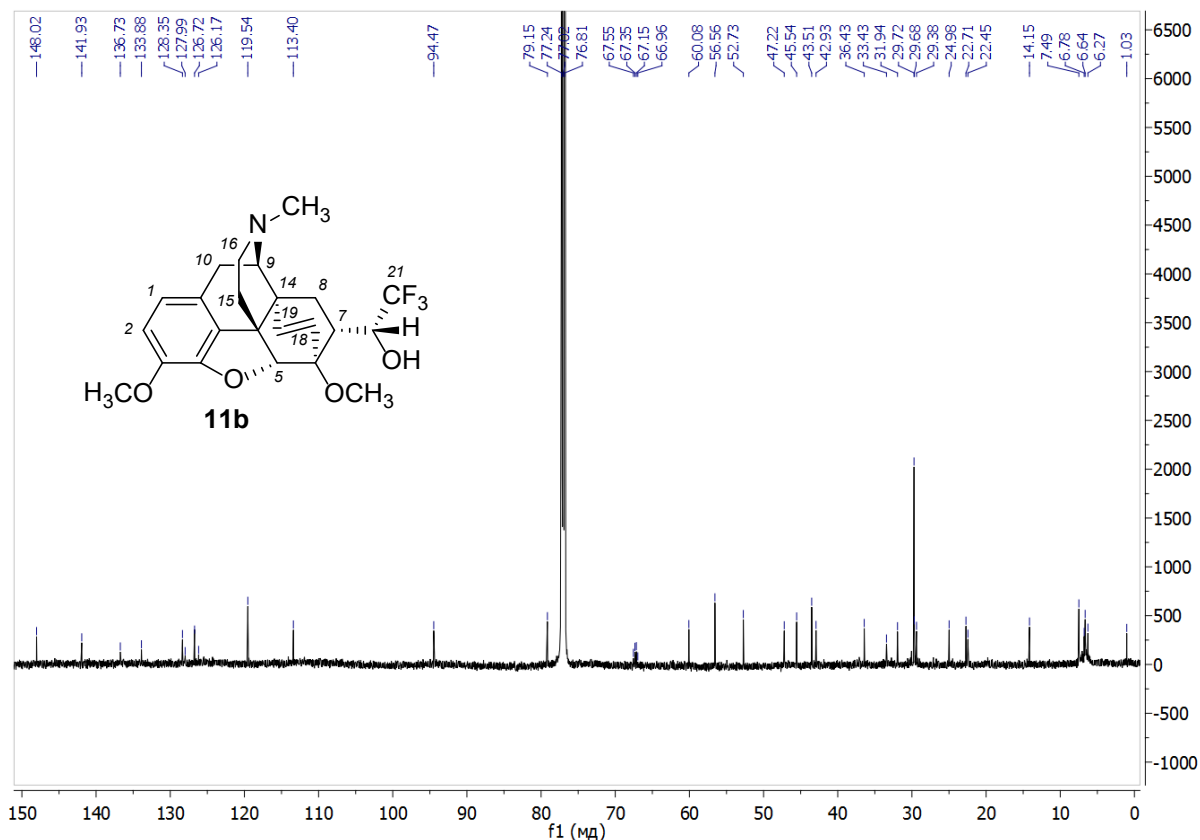

**<sup>19</sup>F{<sup>1</sup>H} NMR Spectrum of (5*R*,6*R*,7*R*,20*R*)-4,5-epoxy-7-(1-hydroxy-2,2,2-trifluoroethyl)-3,6-dimethoxy-17-methyl-6,14-ethenoisomorphinan (11b)**

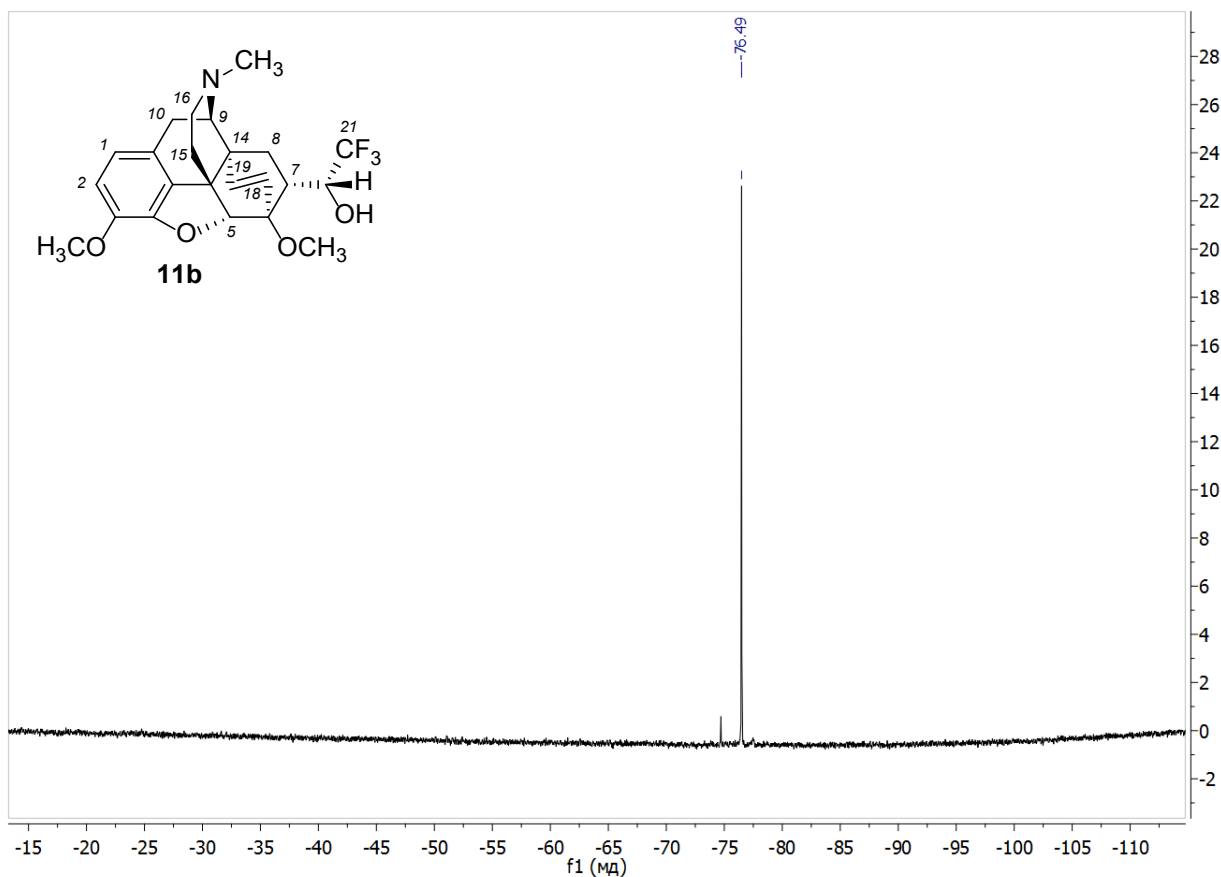

**<sup>1</sup>H NMR Spectrum of (5*R*,6*R*,7*R*,20*S*)-17-cyano-4,5-epoxy-7-(1-hydroxy-2,2,2-trifluoroethyl)-3,6-dimethoxy-6,14-ethenoisomorphinan (11c):**

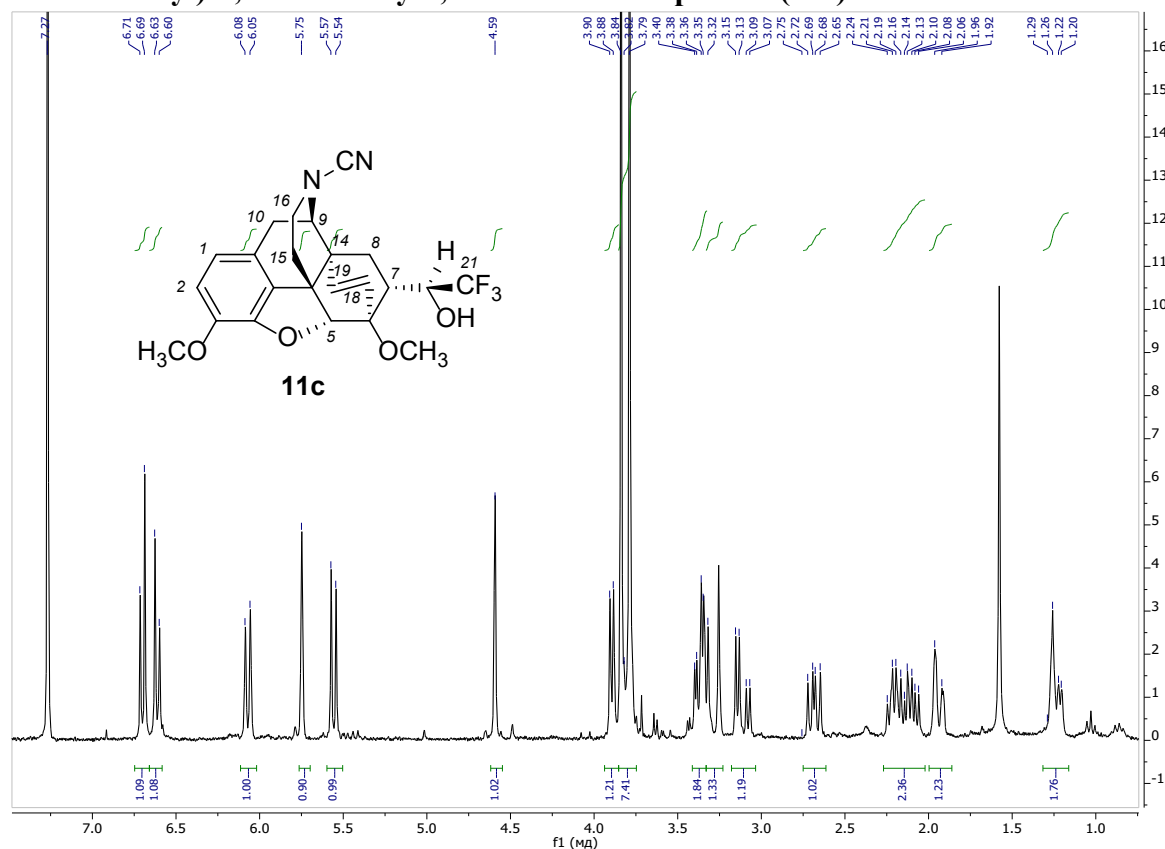

**<sup>13</sup>C NMR Spectrum of (5*R*,6*R*,7*R*,20*S*)-17-cyano-4,5-epoxy-7-(1-hydroxy-2,2,2-trifluoroethyl)-3,6-dimethoxy-6,14-ethenoisomorphinan (11c):**

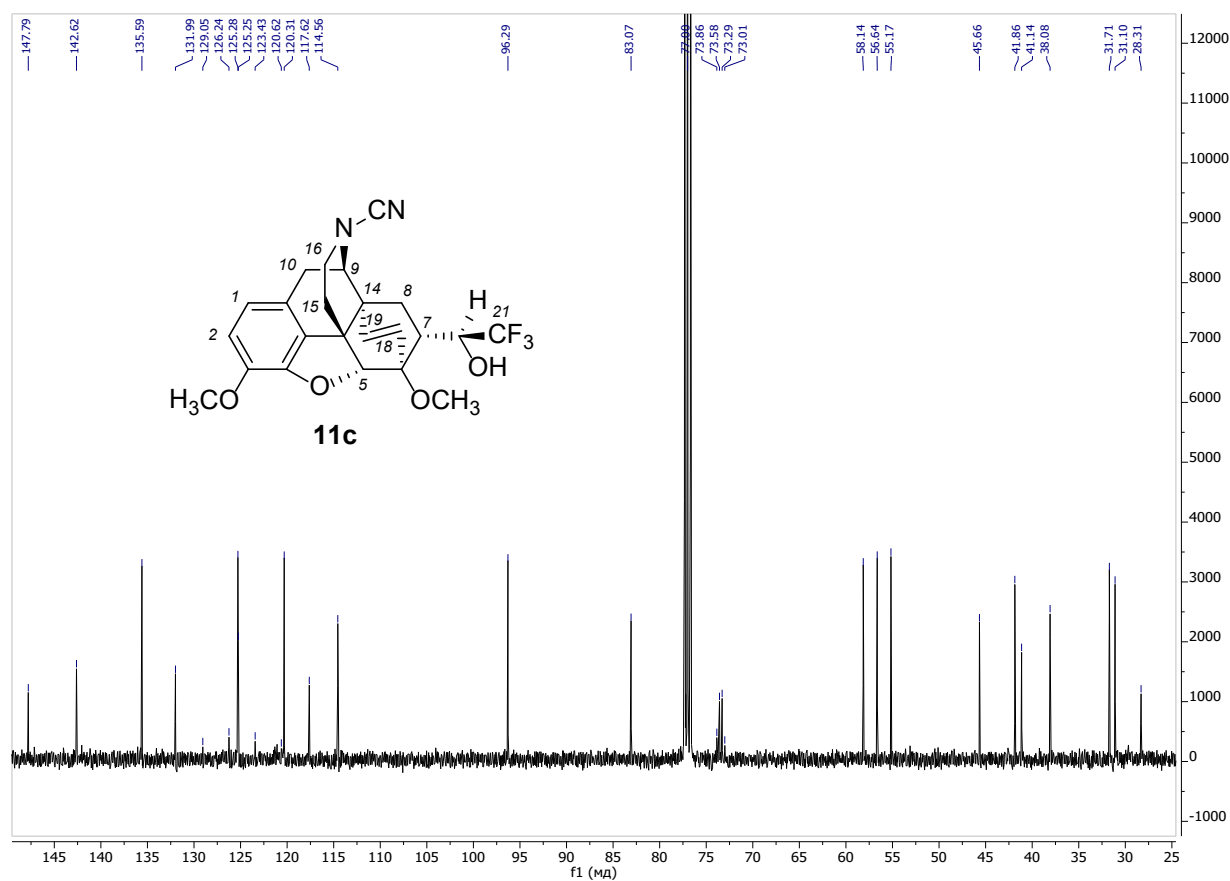

<sup>19</sup>F NMR Spectrum of (5*R*,6*R*,7*R*,20*S*)-17-cyano-4,5-epoxy-7-(1-hydroxy-2,2,2-trifluoroethyl)-3,6-dimethoxy-6,14-ethenoisomorphinan (**11c**):

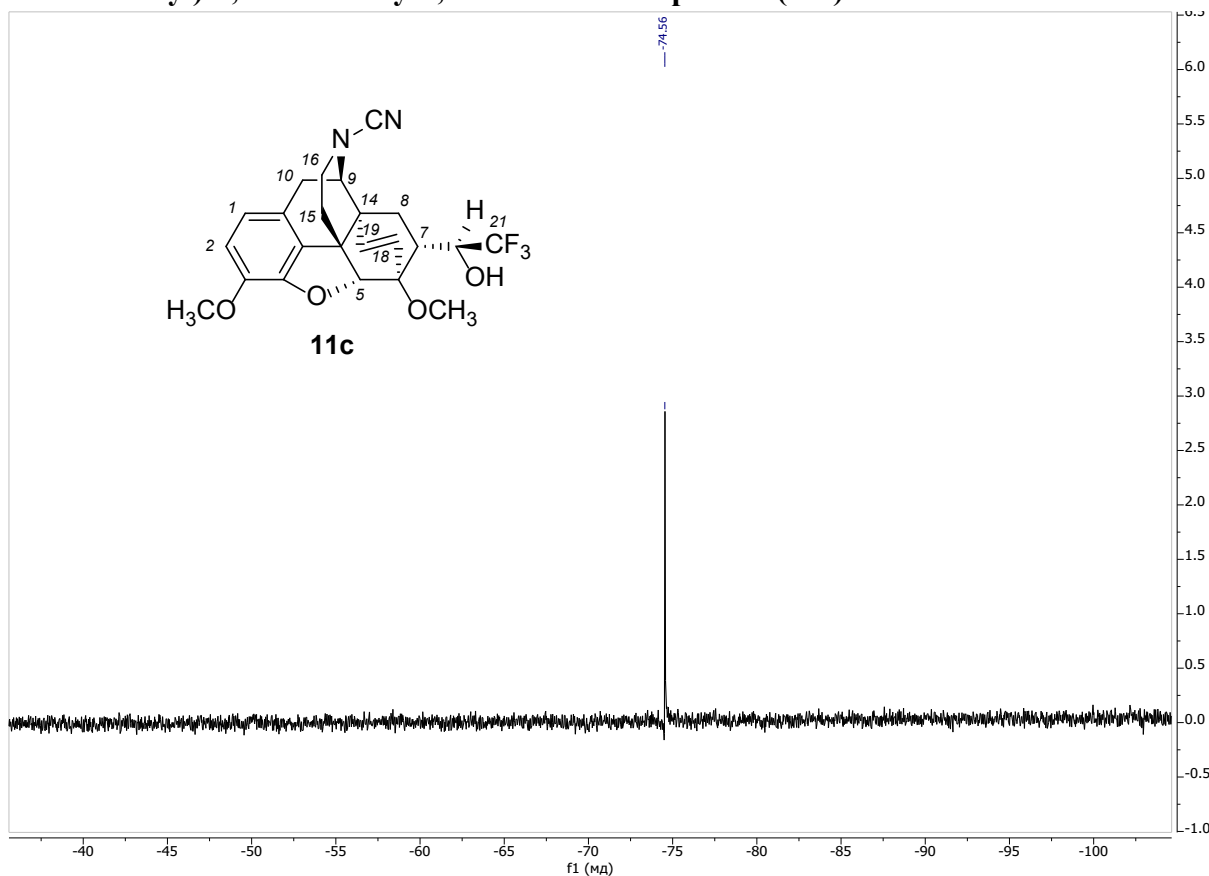

<sup>1</sup>H NMR Spectrum of (5*R*,6*R*,7*R*,20*S*)-4,5-epoxy-7-(1-hydroxy-1-methyl-2,2,2-trifluoroethyl)-3,6-dimethoxy-17-methyl-6,14-ethenoisomorphinan (**15b**):

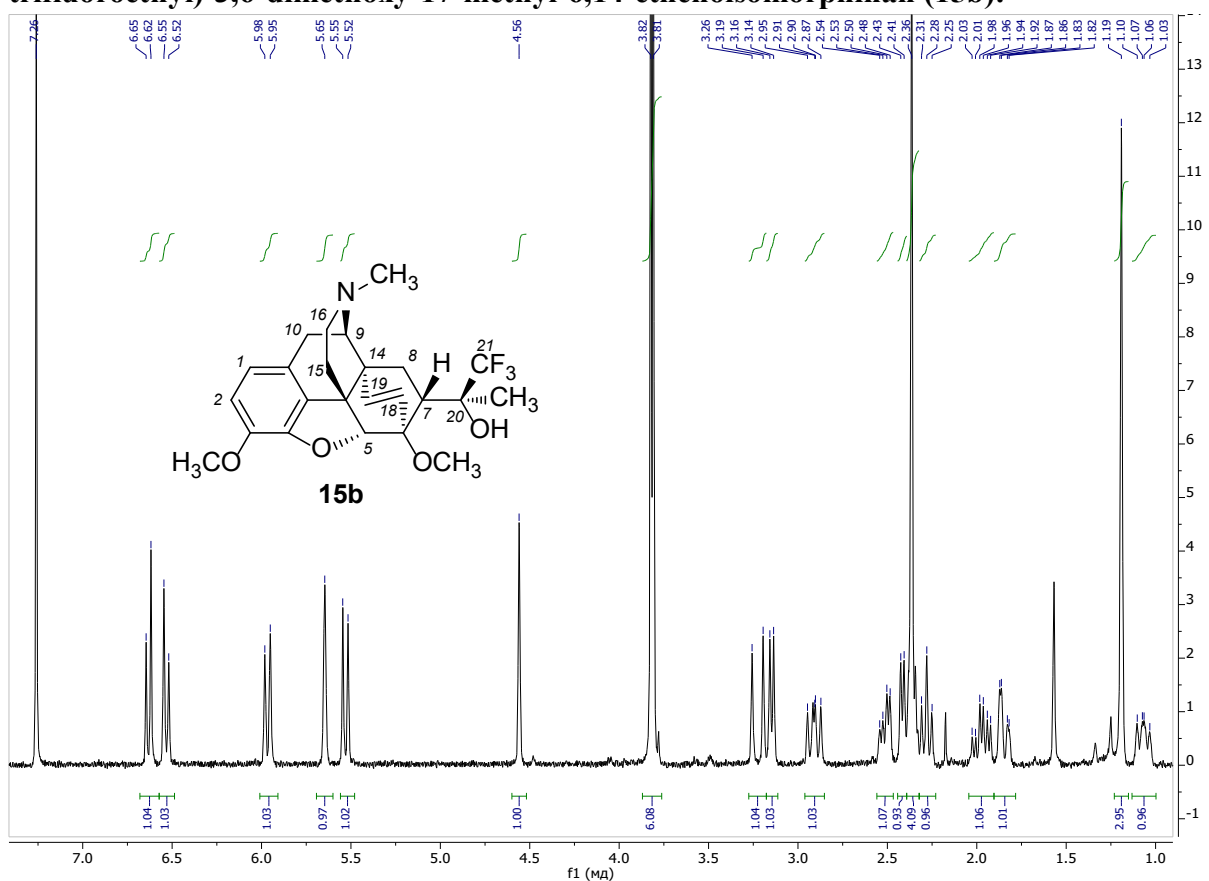

**<sup>13</sup>C NMR Spectrum of (5R,6R,7R,20S)-4,5-epoxy-7-(1-hydroxy-1-methyl-2,2,2-trifluoroethyl)-3,6-dimethoxy-17-methyl-6,14-ethenoisomorphinan (15b):**

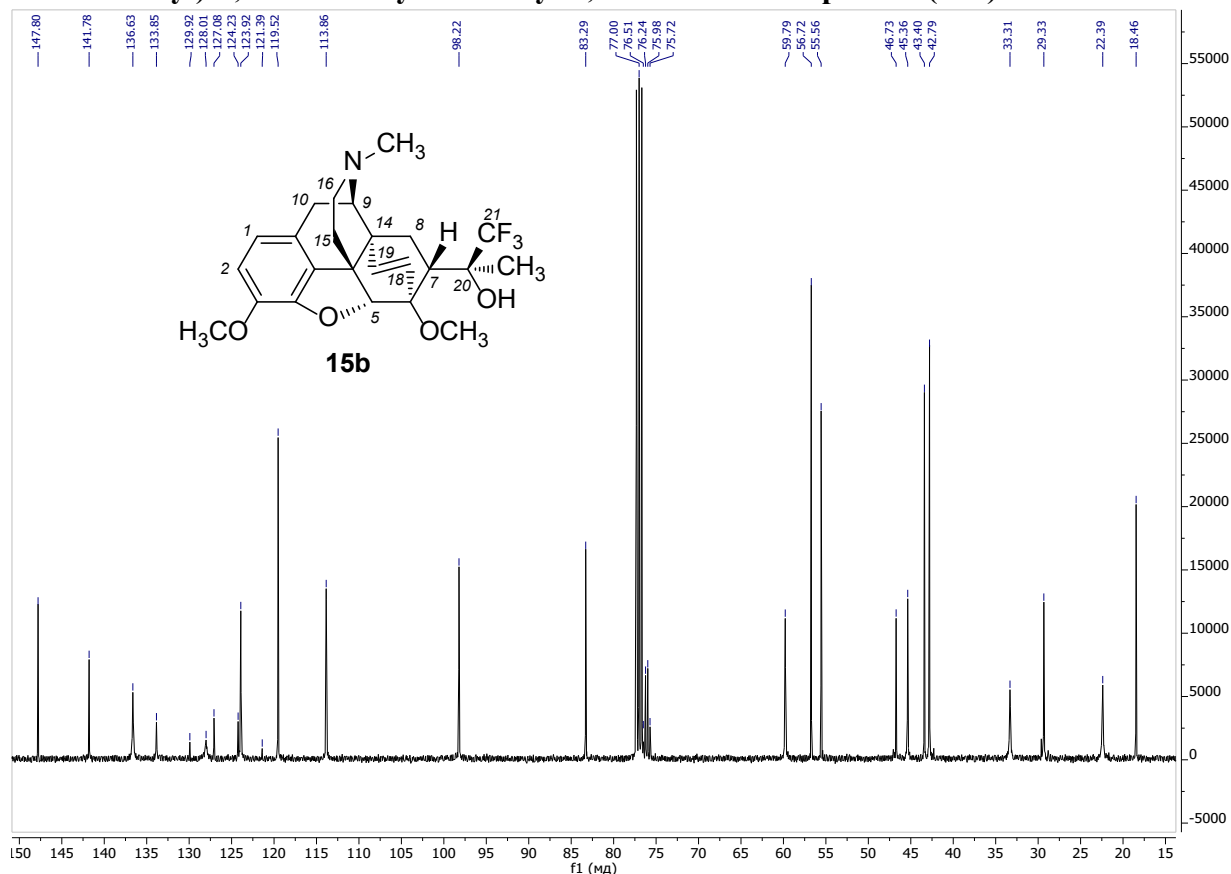

**<sup>19</sup>F NMR Spectrum of (5R,6R,7R,20S)-4,5-epoxy-7-(1-hydroxy-1-methyl-2,2,2-trifluoroethyl)-3,6-dimethoxy-17-methyl-6,14-ethenoisomorphinan (15b):**

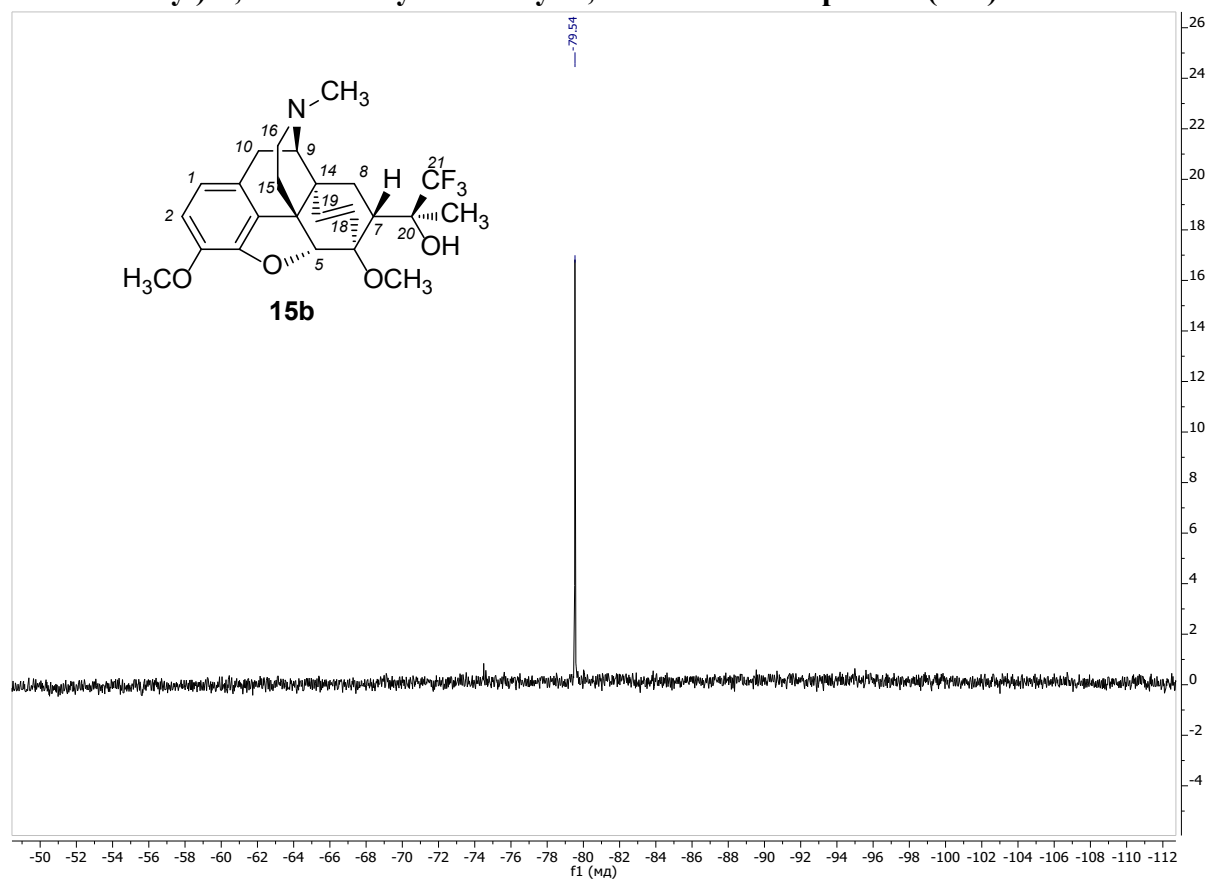



**<sup>19</sup>F NMR Spectrum of (5*R*,6*R*,7*R*,20*S*)-4,5-epoxy-3,6-dimethoxy-17-methyl-7-(1-hydroxy-1-(trifluoromethyl)propyl)- 6,14-ethenoisomorphinan (16b):**

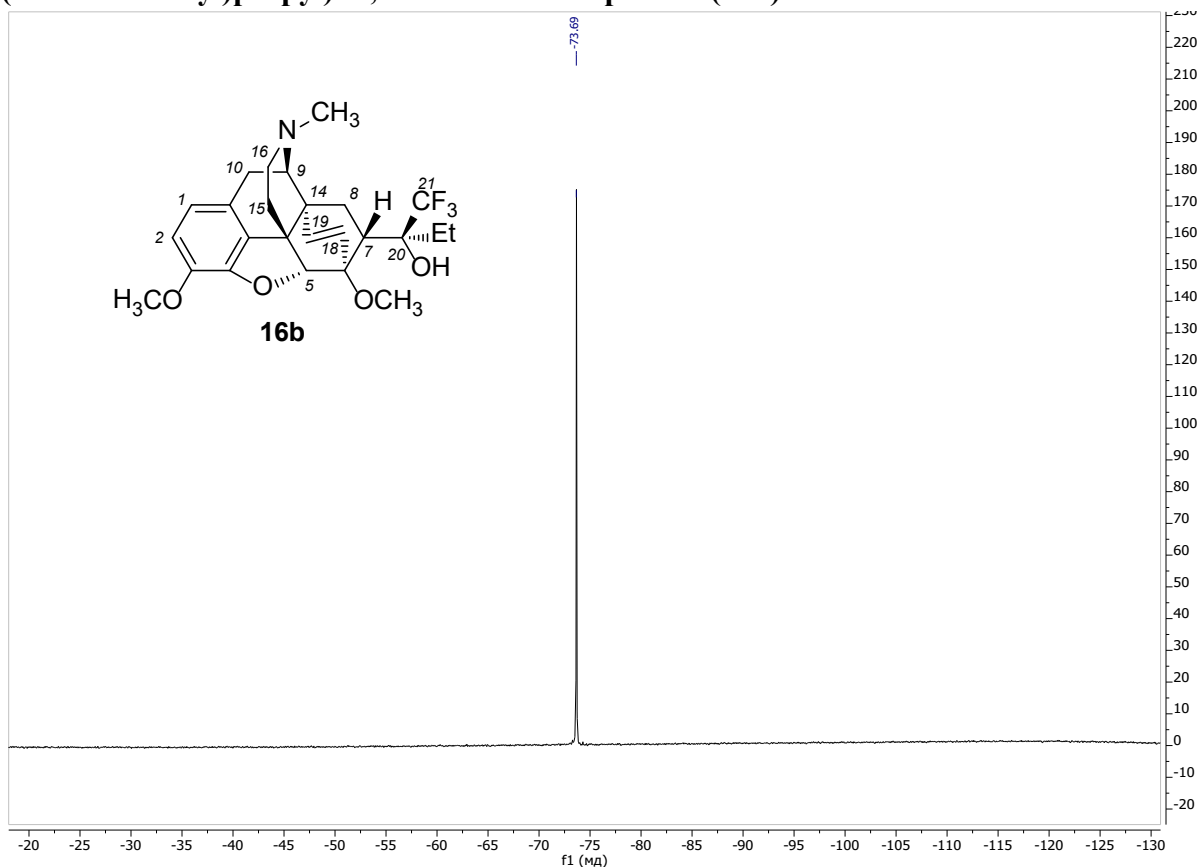

**<sup>1</sup>H NMR Spectrum of (5*R*,6*R*,7*R*,20*S*)-7-(1-hydroxy-1-(trifluoromethyl)butyl)-4,5-epoxy-3,6-dimethoxy-17-methyl-6,14-ethenoisomorphinan (18b):**

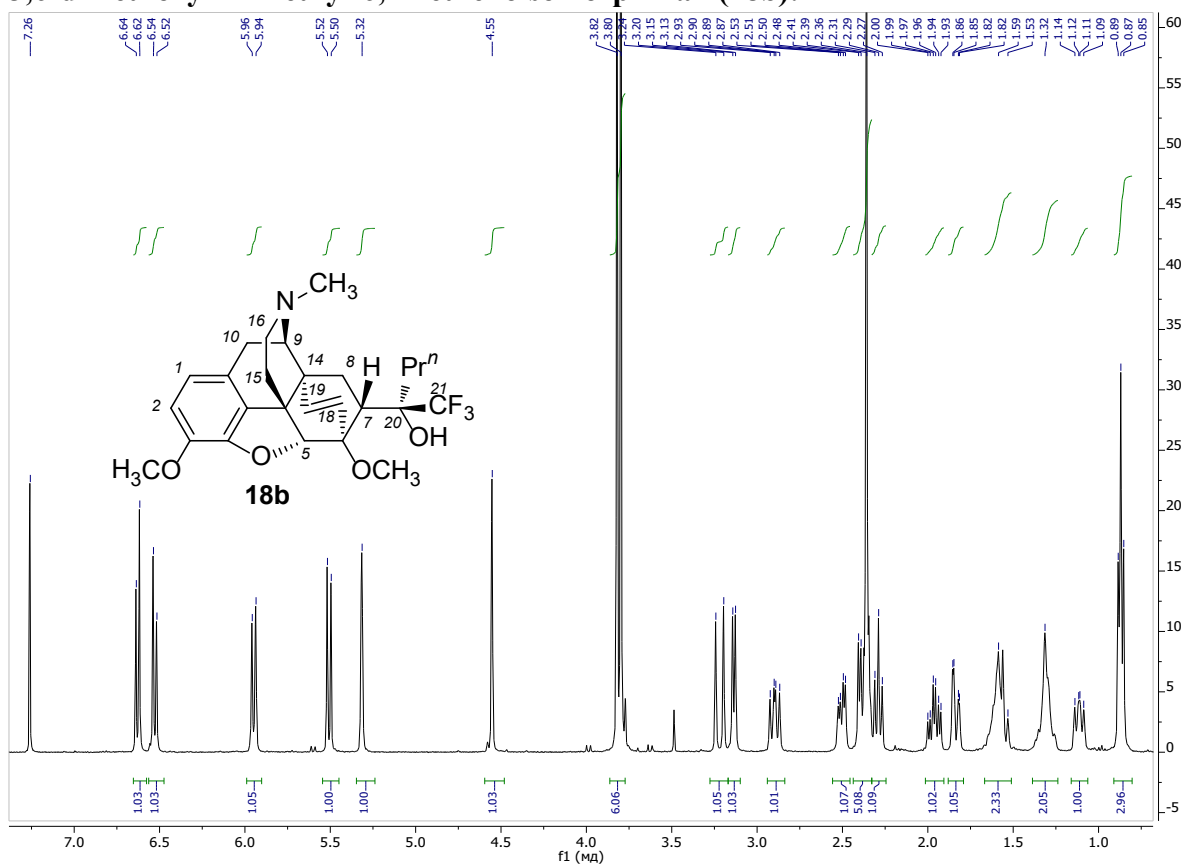

**<sup>13</sup>C NMR Spectrum of (5*R*,6*R*,7*R*,20*S*)-7-(1-hydroxy-1-(trifluoromethyl)butyl)-4,5-epoxy-3,6-dimethoxy-17-methyl-6,14-ethenoisomorphinan (18b):**

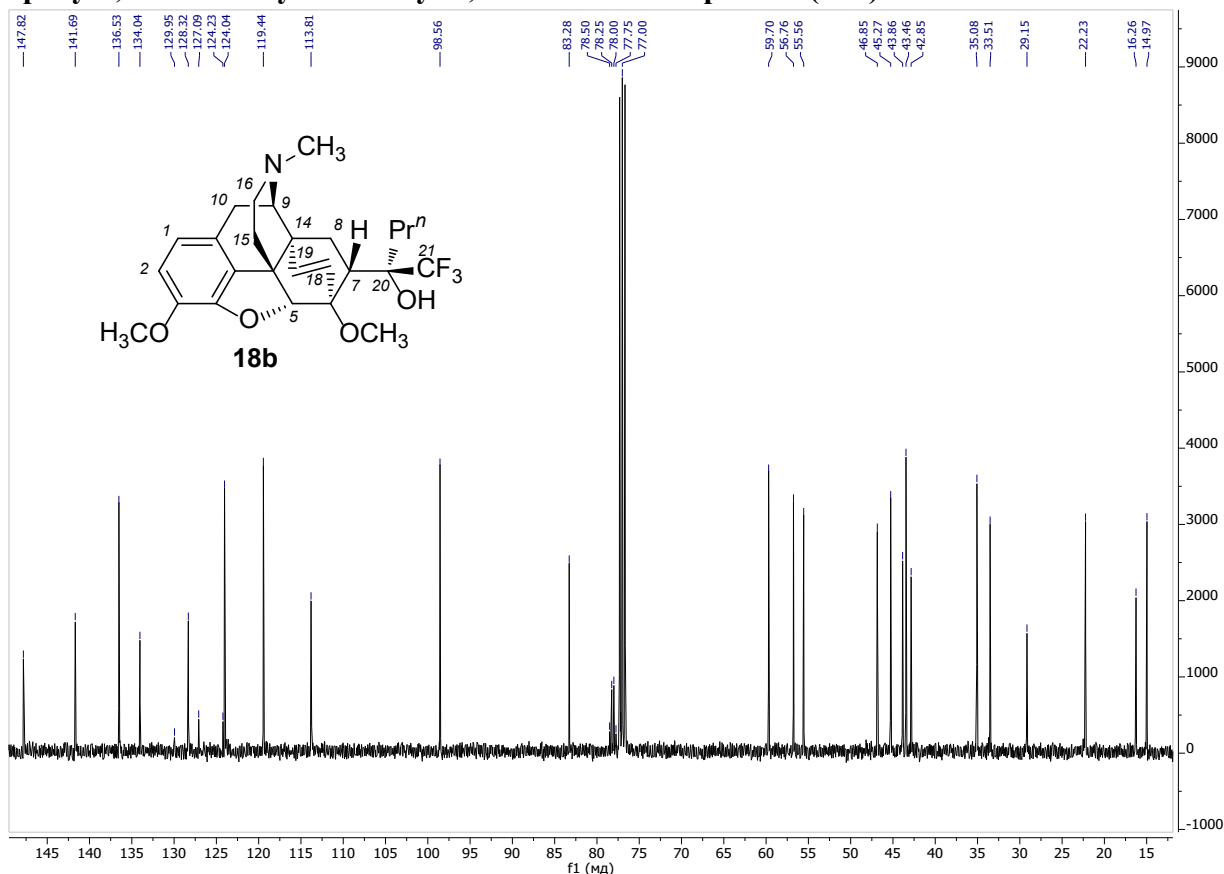

**<sup>19</sup>F NMR Spectrum of (5*R*,6*R*,7*R*,20*S*)-7-(1-hydroxy-1-(trifluoromethyl)butyl)-4,5-epoxy-3,6-dimethoxy-17-methyl-6,14-ethenoisomorphinan (18b):**

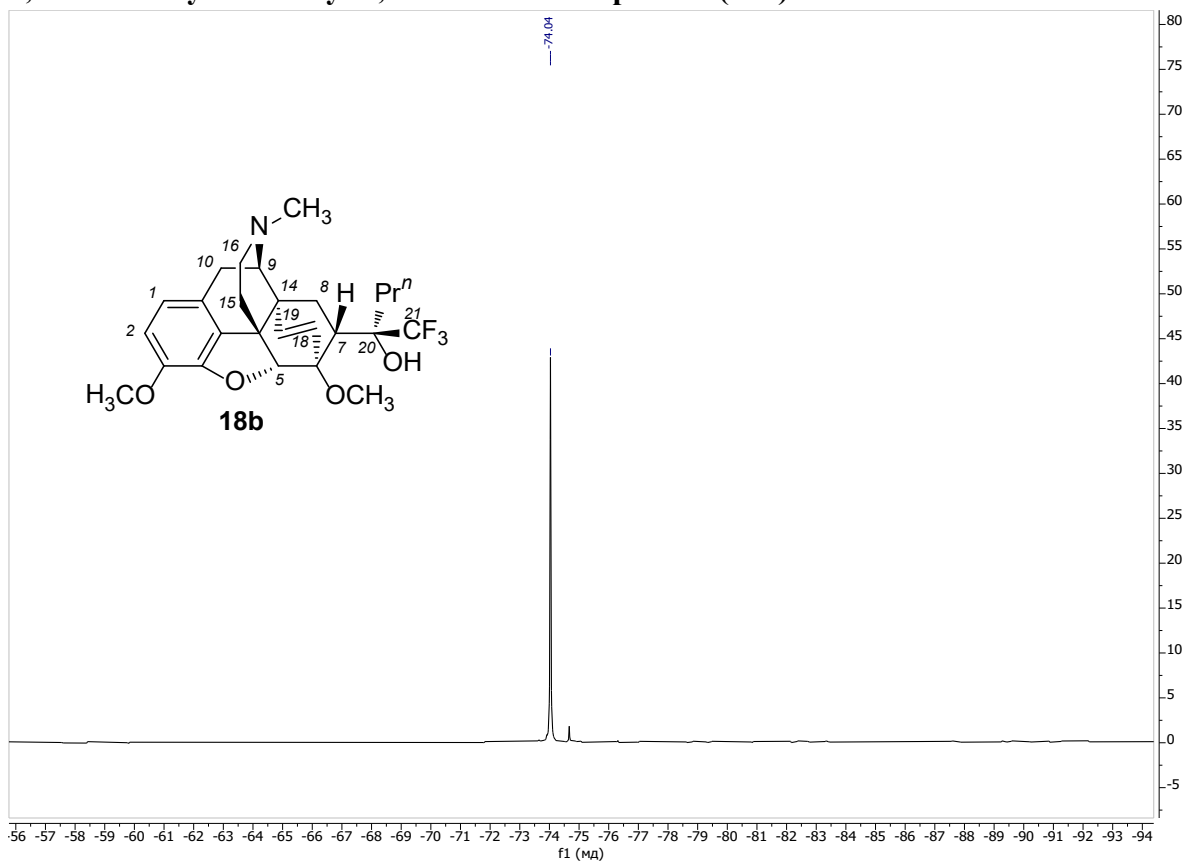

**<sup>1</sup>H NMR Spectrum of (5*R*,6*R*,7*R*,20*S*)-4,5-epoxy-3,6-dimethoxy-17-methyl-7-(1-hydroxy-1-(trifluoromethyl)pentyl)-6,14-ethenoisomorphinan (17b):**

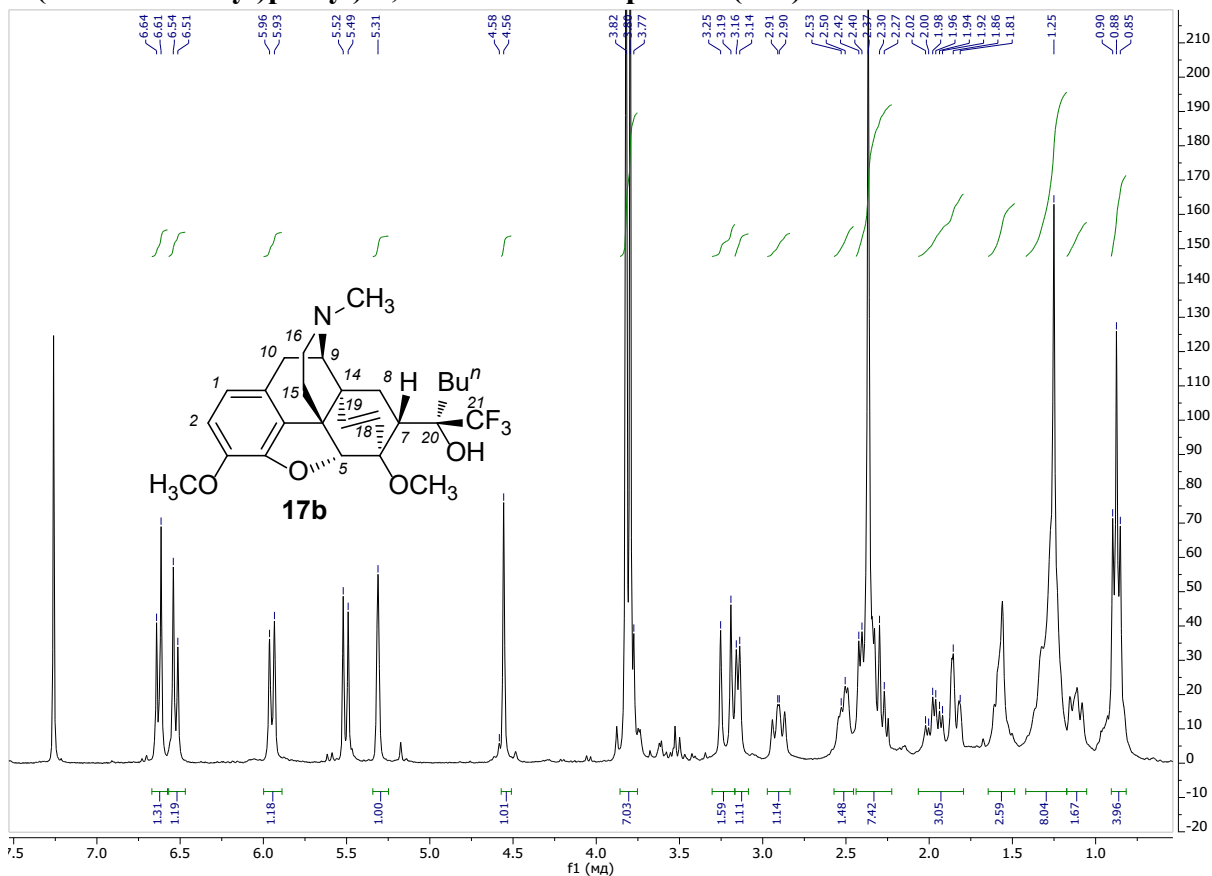

**<sup>13</sup>C NMR Spectrum of (5*R*,6*R*,7*R*,20*S*)-4,5-epoxy-3,6-dimethoxy-17-methyl-7-(1-hydroxy-1-(trifluoromethyl)pentyl)-6,14-ethenoisomorphinan (17b):**

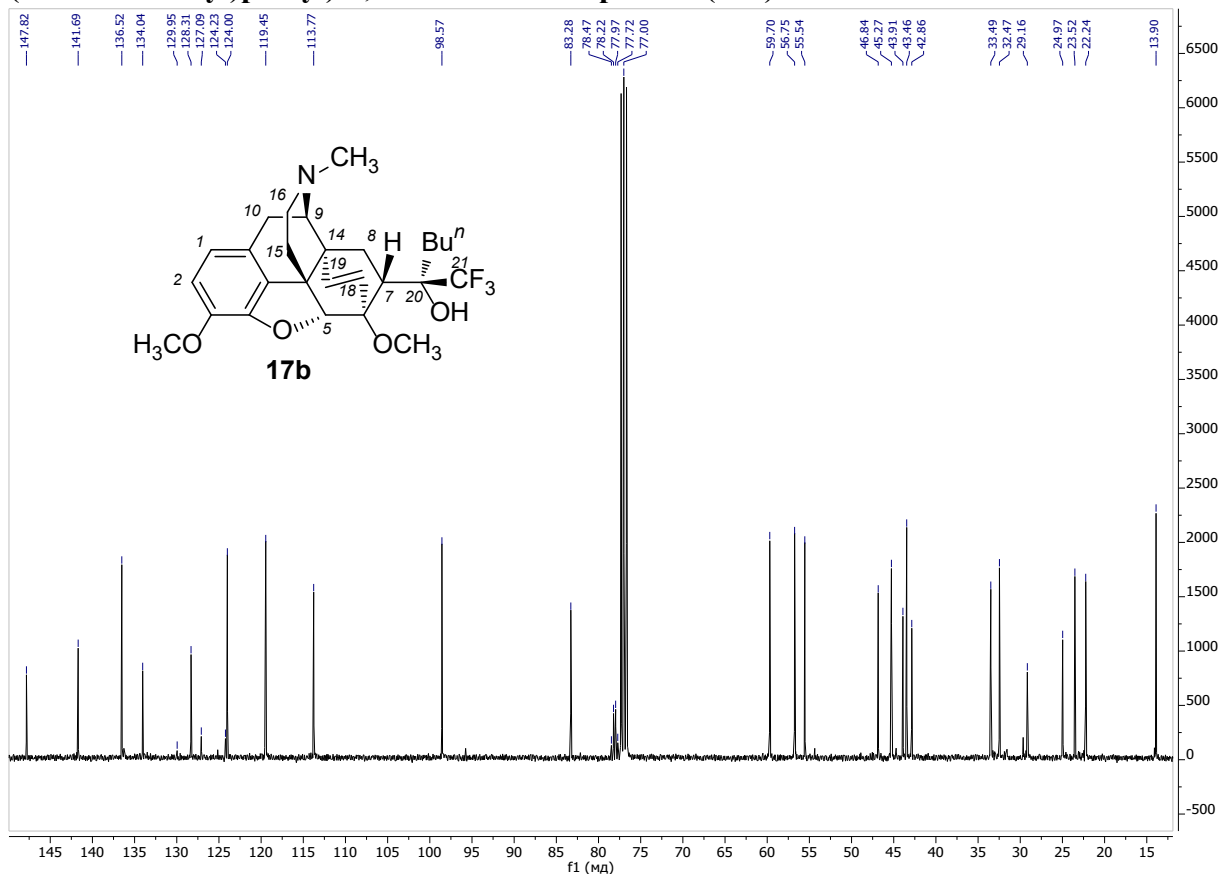



**<sup>19</sup>F NMR Spectrum of (5*R*,6*R*,7*R*,20*S*)-4,5-epoxy-3,6-dimethoxy-17-methyl-7-(1-hydroxy-1-(trifluoromethyl)pentyl)-6,14-ethenoisomorphinan (17b):**

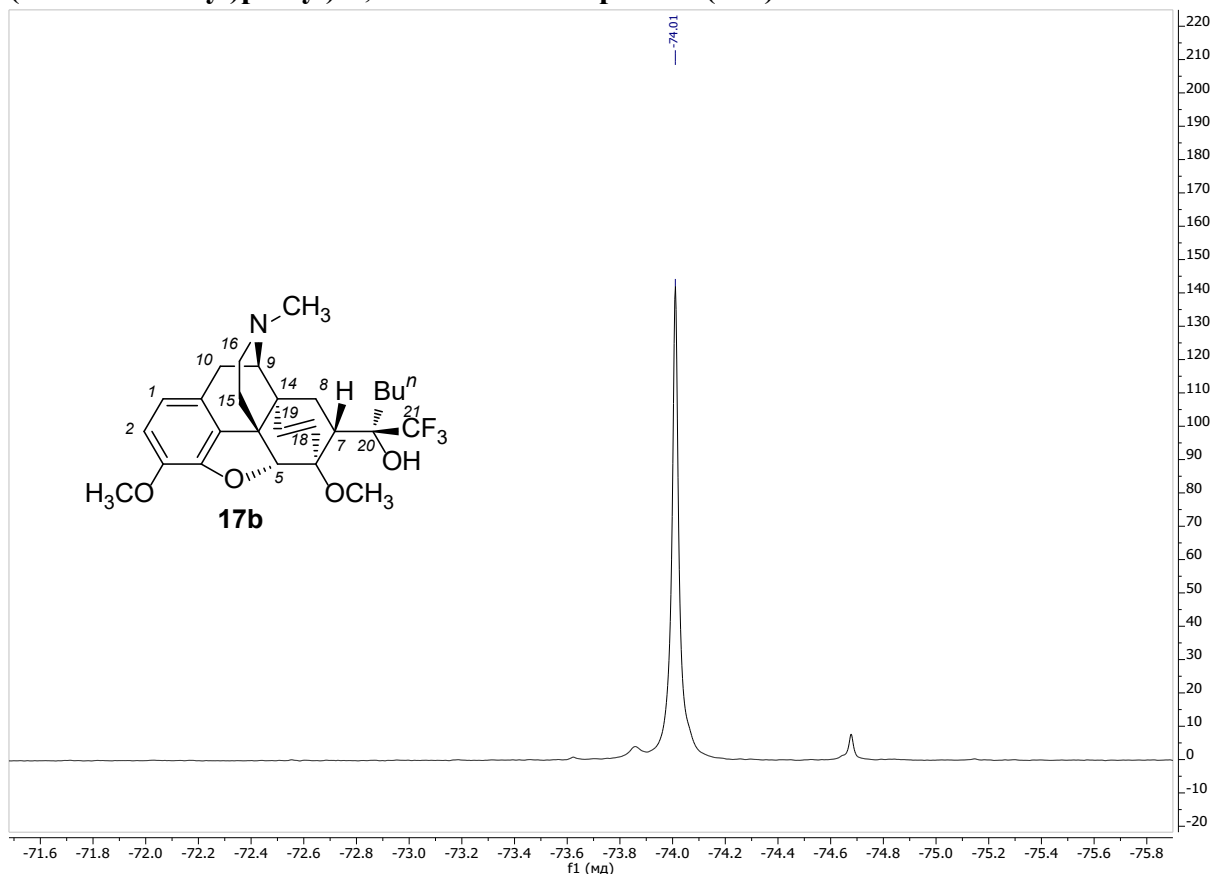

**<sup>1</sup>H NMR Spectrum of (5*R*,6*R*,7*R*,20*R*)-4,5-epoxy-7-(1-hydroxy-1-methyl-2,2,2-trifluoroethyl)-3,6-dimethoxy-17-methyl-6,14-ethenoisomorphinan (15a):**

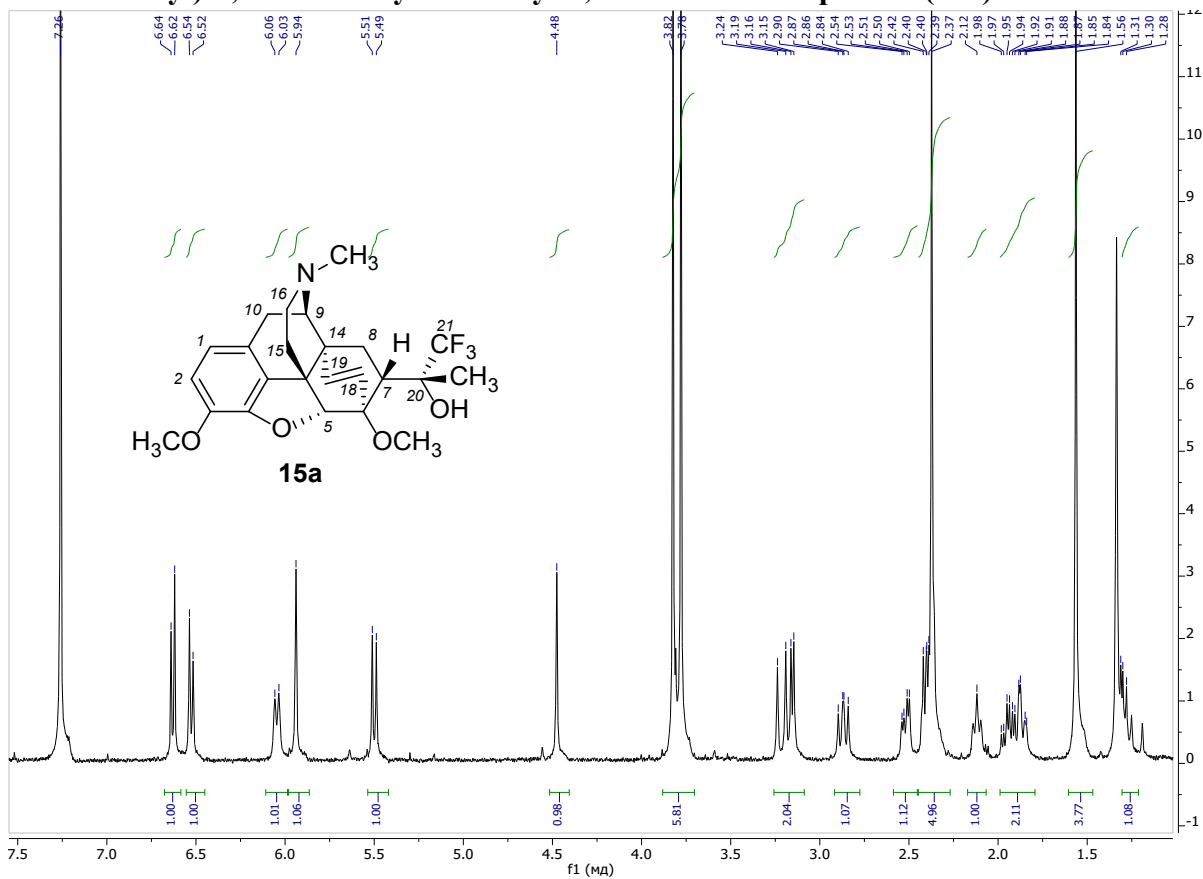

**<sup>13</sup>C NMR Spectrum of (5*R*,6*R*,7*R*,20*R*)-4,5-epoxy-7-(1-hydroxy-1-methyl-2,2,2-trifluoroethyl)-3,6-dimethoxy-17-methyl-6,14-ethenoisomorphinan (15a):**

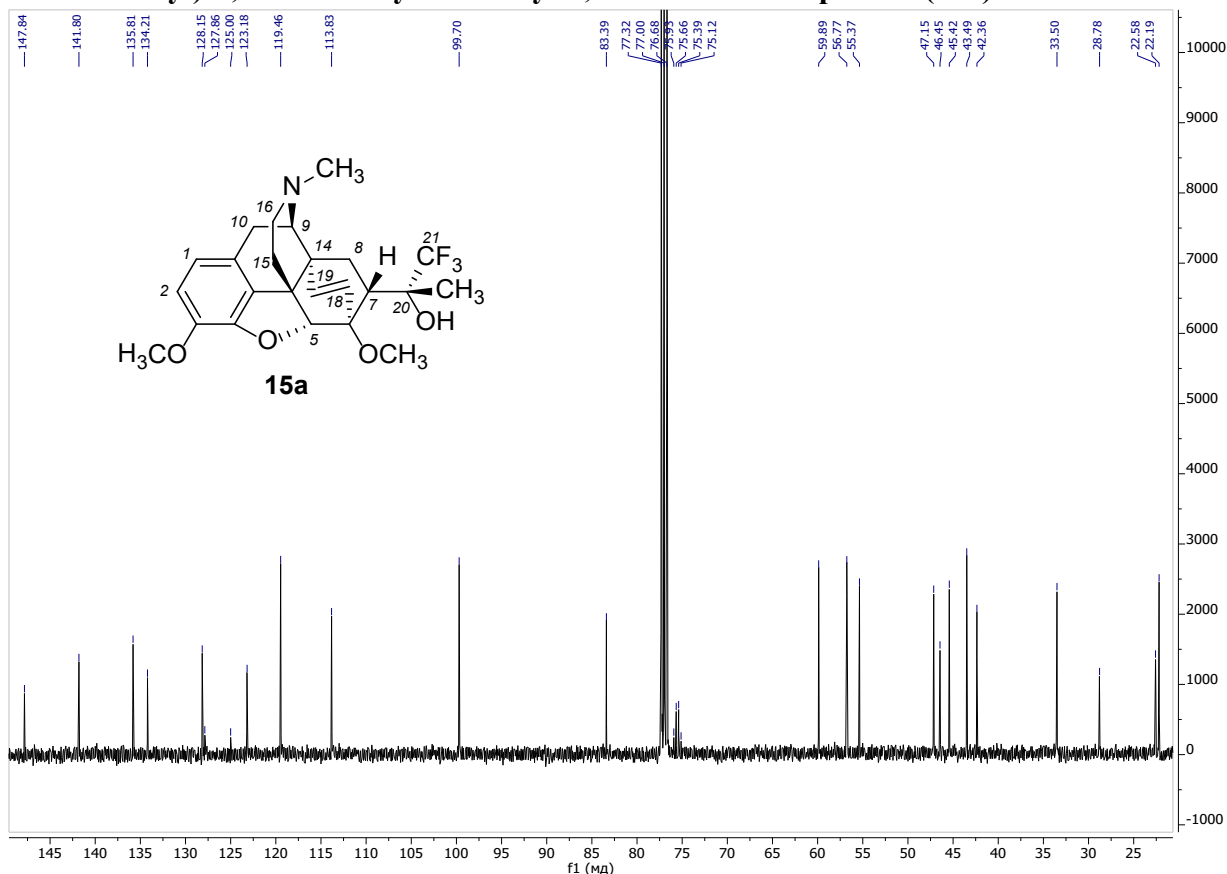

**<sup>19</sup>F NMR Spectrum of (5*R*,6*R*,7*R*,20*R*)-4,5-epoxy-7-(1-hydroxy-1-methyl-2,2,2-trifluoroethyl)-3,6-dimethoxy-17-methyl-6,14-ethenoisomorphinan (15a):**

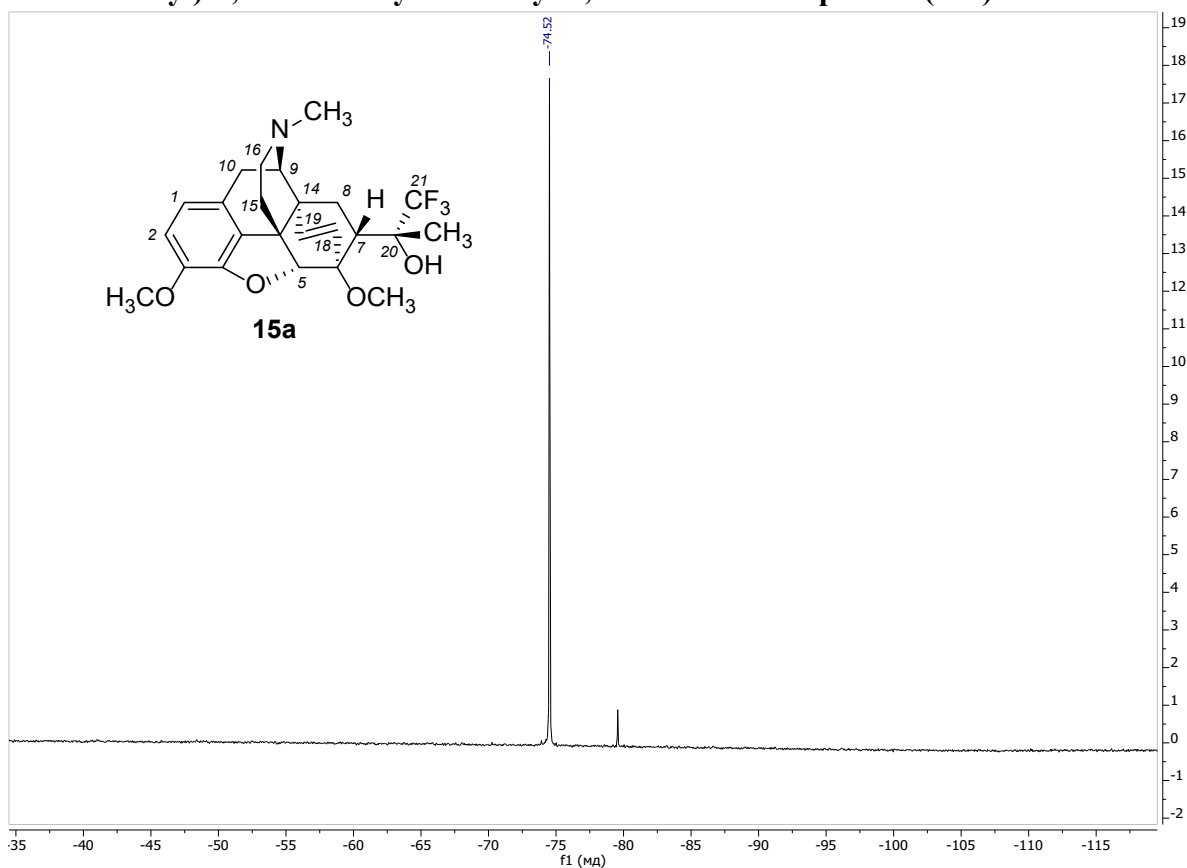

**<sup>1</sup>H NMR Spectrum of (5*R*,6*R*,7*R*,20*R*)-4,5-epoxy-7-(1-hydroxy-1-(trifluoromethyl)ethyl)-3,6-dimethoxy-17-methyl-6,14-ethenoisomorphinan (16a):**

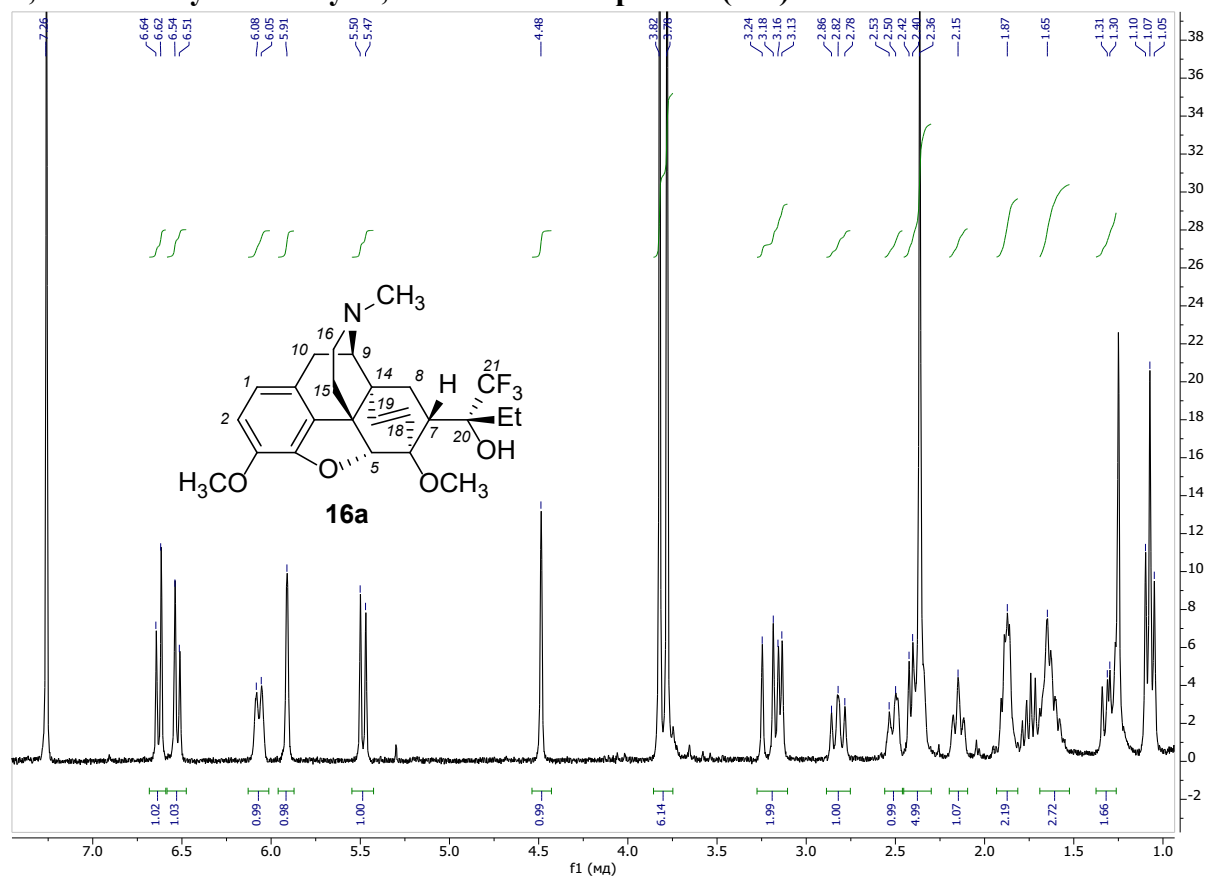

**<sup>13</sup>C (JMODECHO) NMR Spectrum of (5*R*,6*R*,7*R*,20*R*)-4,5-epoxy-7-(1-hydroxy-1-(trifluoromethyl)ethyl)-3,6-dimethoxy-17-methyl-6,14-ethenoisomorphinan (16a):**

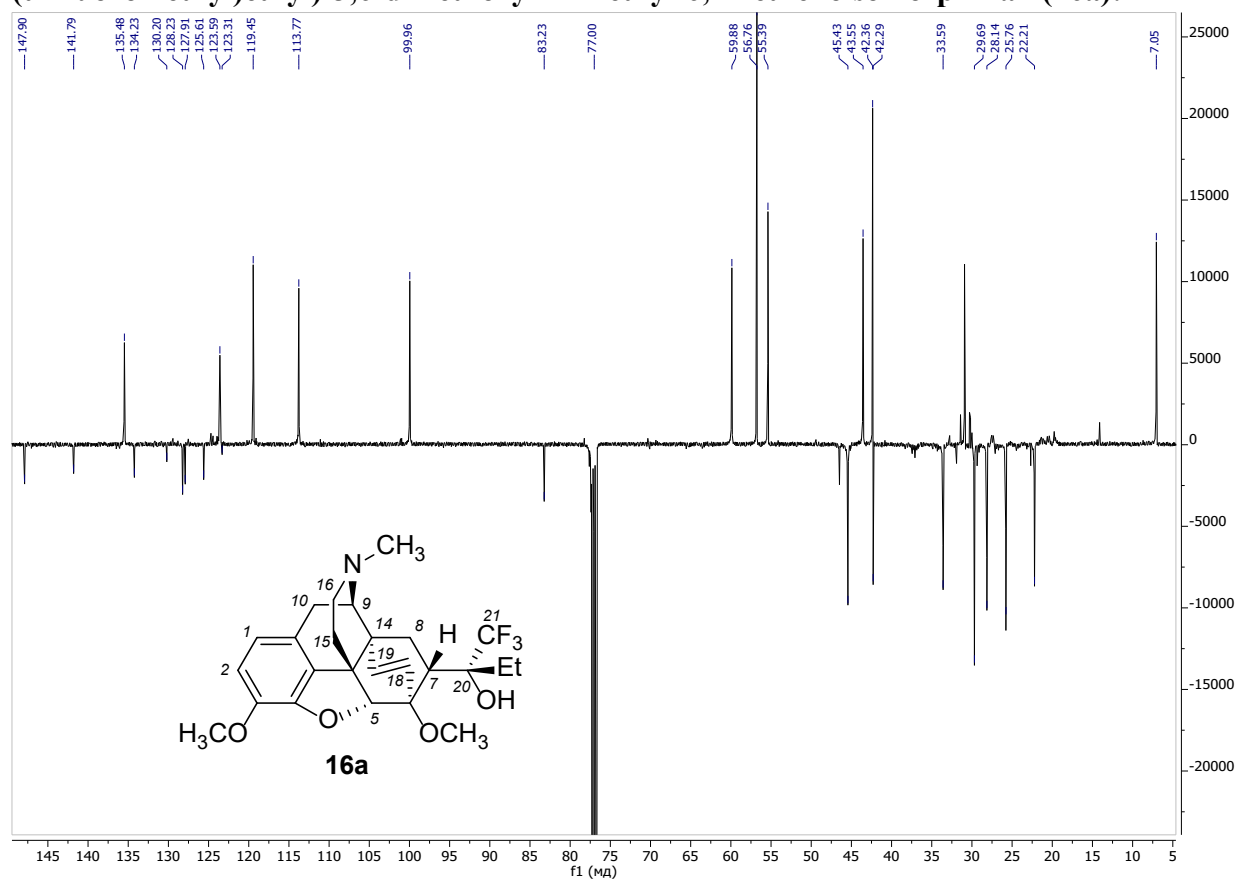

**$^{19}\text{F}$  NMR Spectrum of (5*R*,6*R*,7*R*,20*R*)-4,5-epoxy-7-(1-hydroxy-1-(trifluoromethyl)ethyl)-3,6-dimethoxy-17-methyl-6,14-ethenoisomorphinan (16a):**

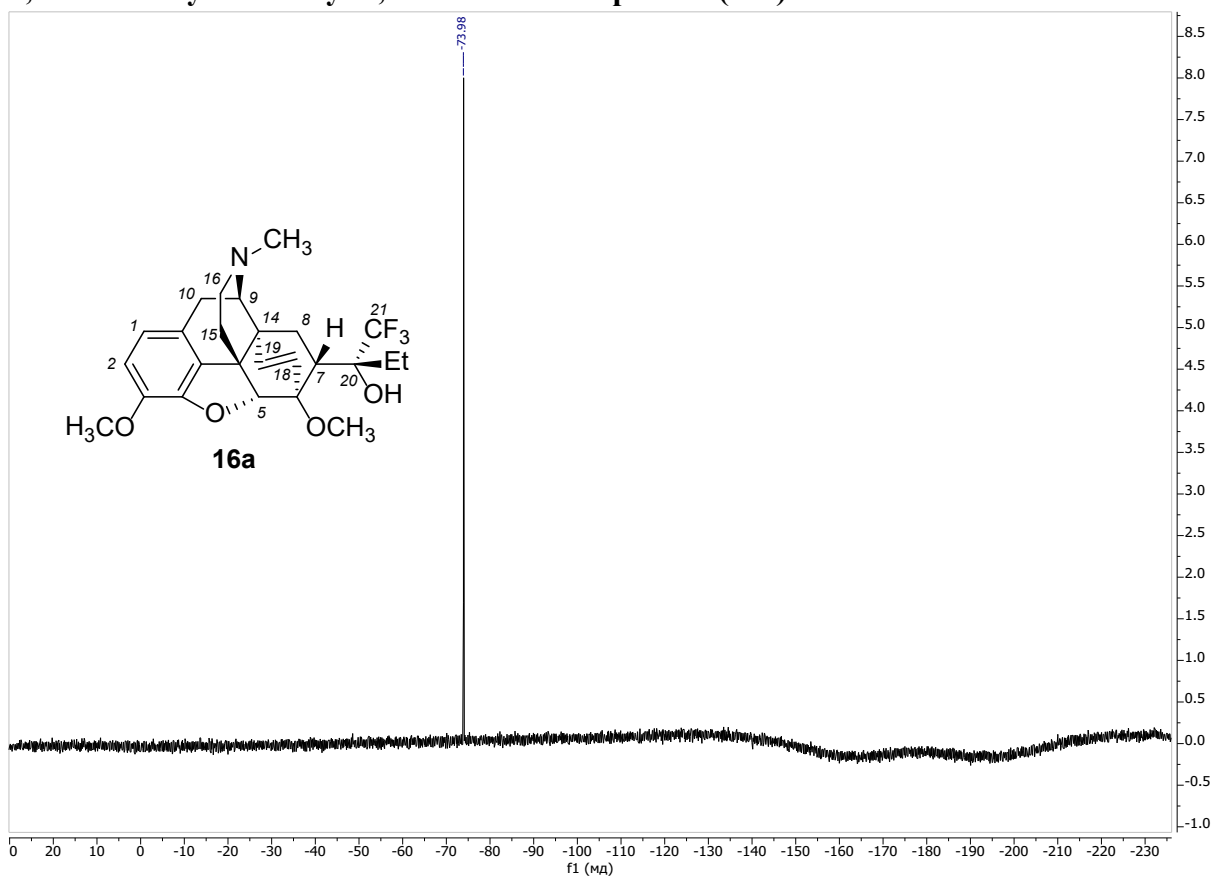

**$^1\text{H}$  NMR Spectrum of (5*R*,6*R*,7*R*,20*R*)-4,5-epoxy-3,6-dimethoxy-17-methyl-7-(1-hydroxy-1-(trifluoromethyl)propyl)-6,14-ethenoisomorphinan (17a):**

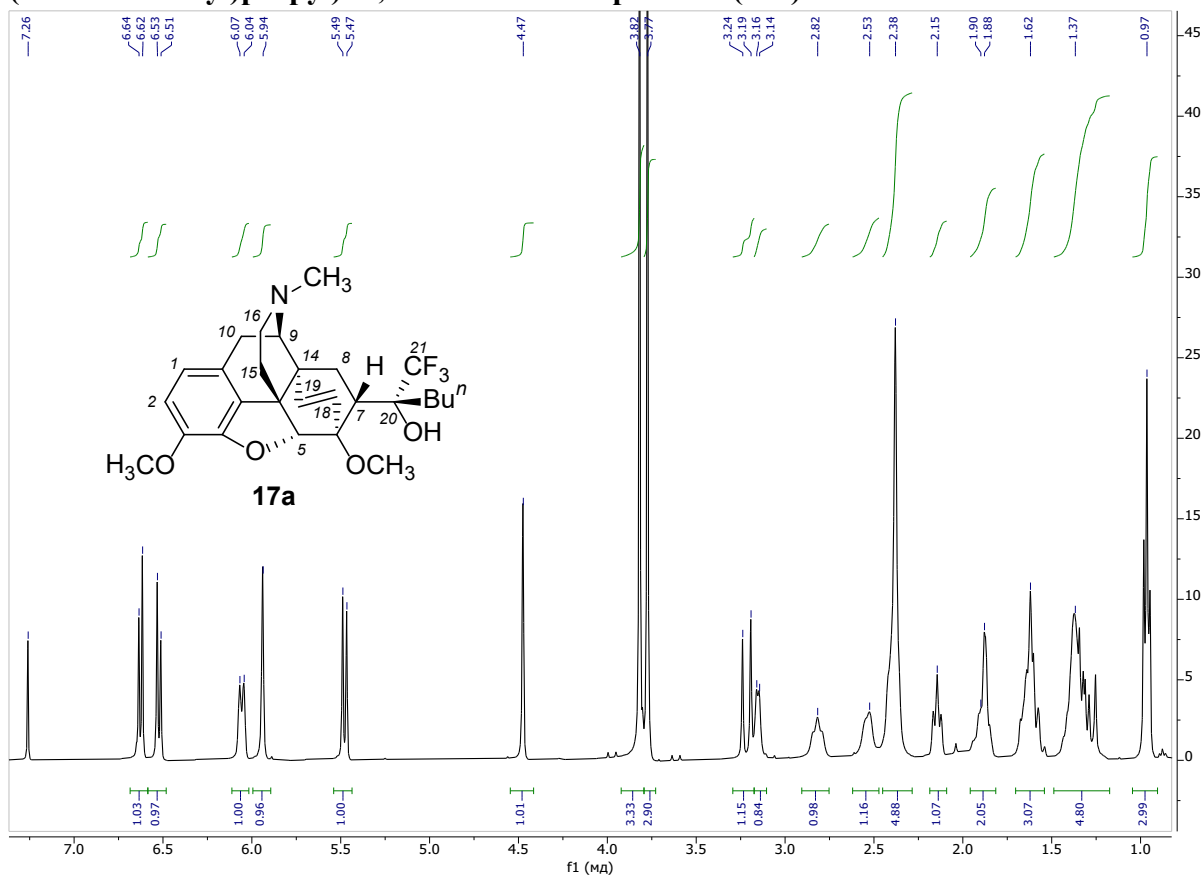

**<sup>13</sup>C NMR Spectrum of (5*R*,6*R*,7*R*,20*R*)-4,5-epoxy-3,6-dimethoxy-17-methyl-7-(1-hydroxy-1-(trifluoromethyl)propyl)- 6,14-ethenoisomorphinan (17a):**

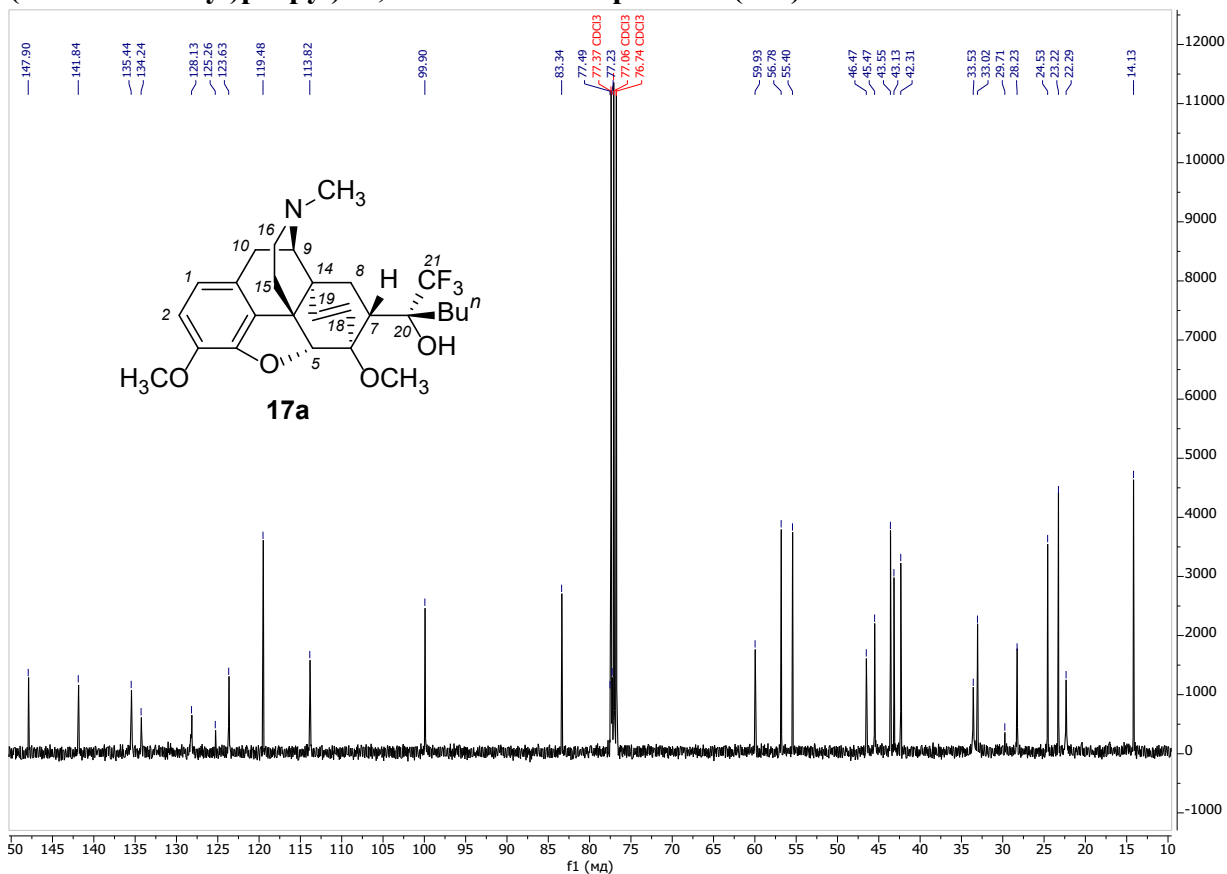

**<sup>19</sup>F NMR Spectrum of (5*R*,6*R*,7*R*,20*R*)-4,5-epoxy-3,6-dimethoxy-17-methyl-7-(1-hydroxy-1-(trifluoromethyl)propyl)- 6,14-ethenoisomorphinan (17a):**

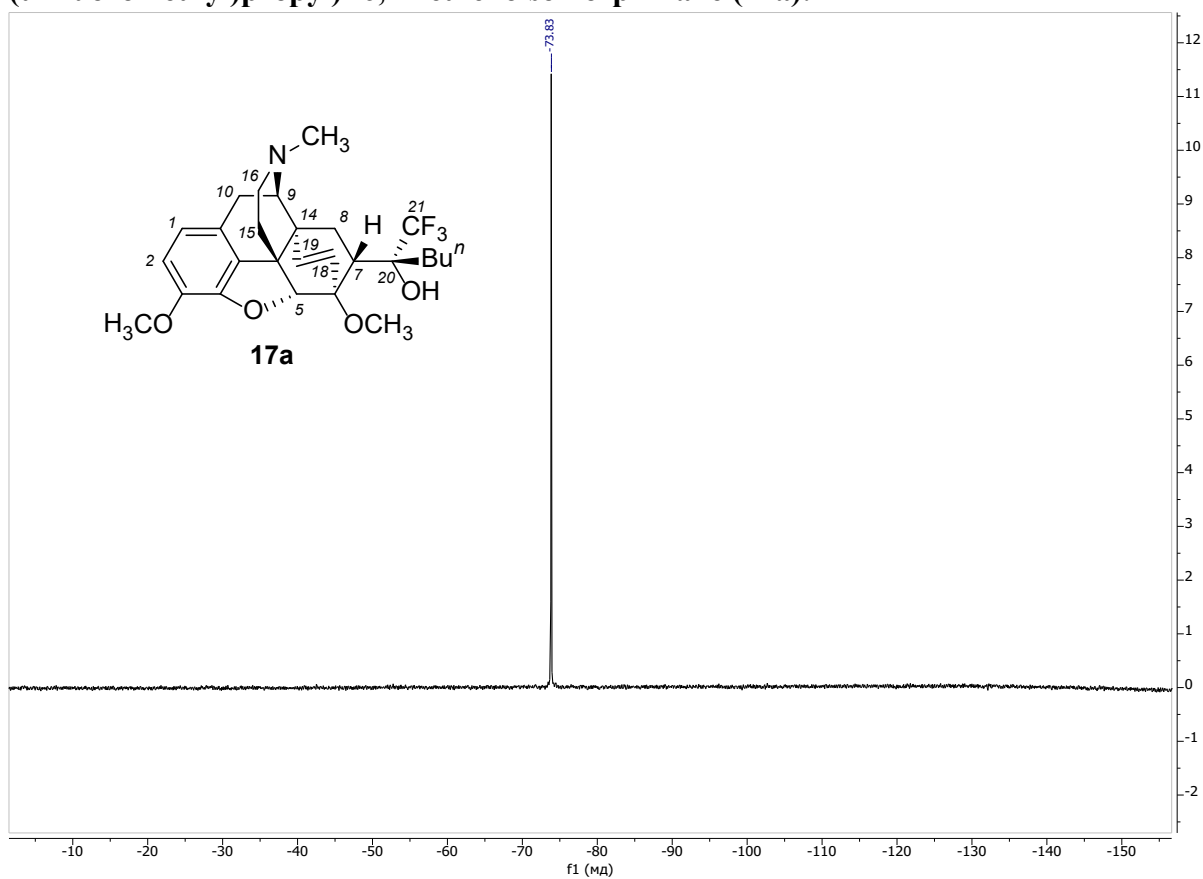

**<sup>1</sup>H NMR Spectrum of (5*R*,6*R*,7*S*)-4,5-epoxy-3,6-dimethoxy-17-methyl-7-pentanoyl-6,14-ethenoisomorphinan [21-*n*-propylthevinone] (20):**

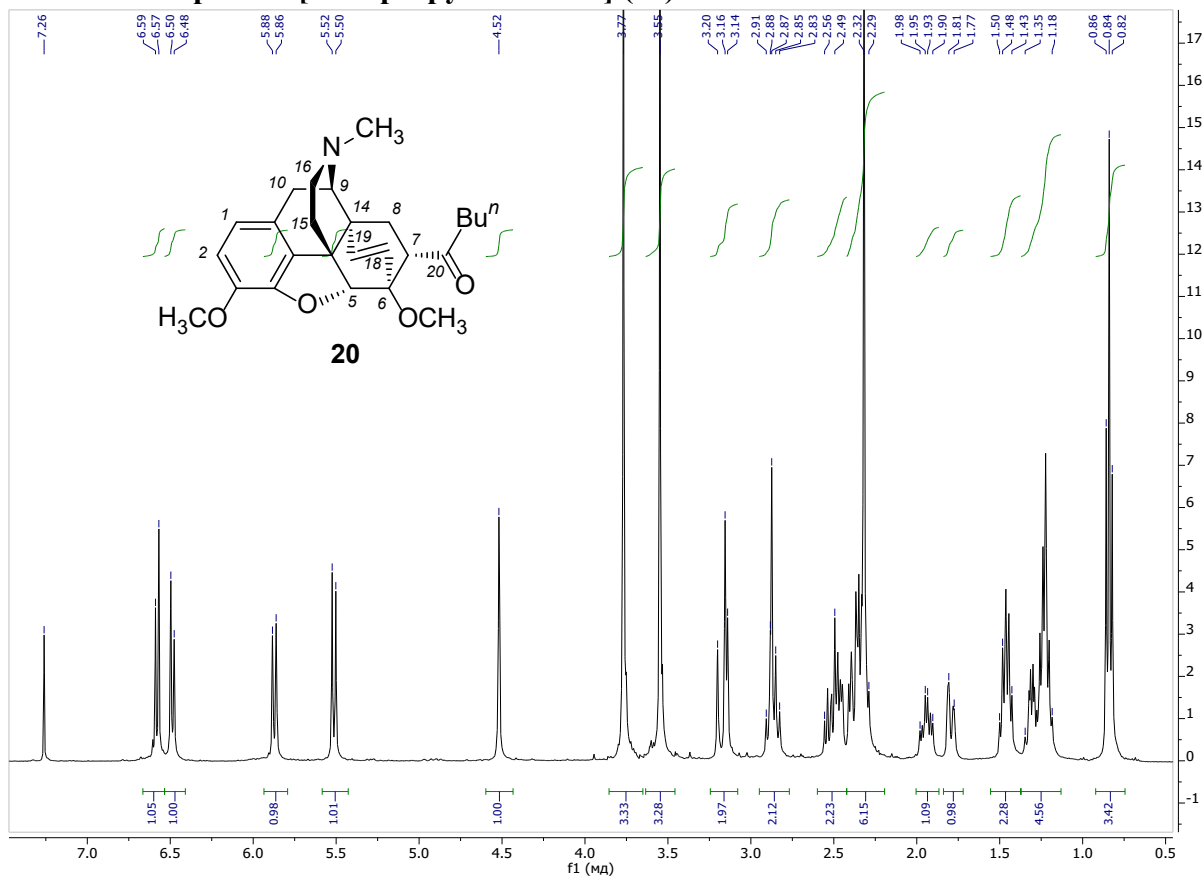

**<sup>13</sup>C NMR Spectrum of (5*R*,6*R*,7*S*)-4,5-epoxy-3,6-dimethoxy-17-methyl-7-pentanoyl-6,14-ethenoisomorphinan [21-*n*-propylthevinone] (20):**

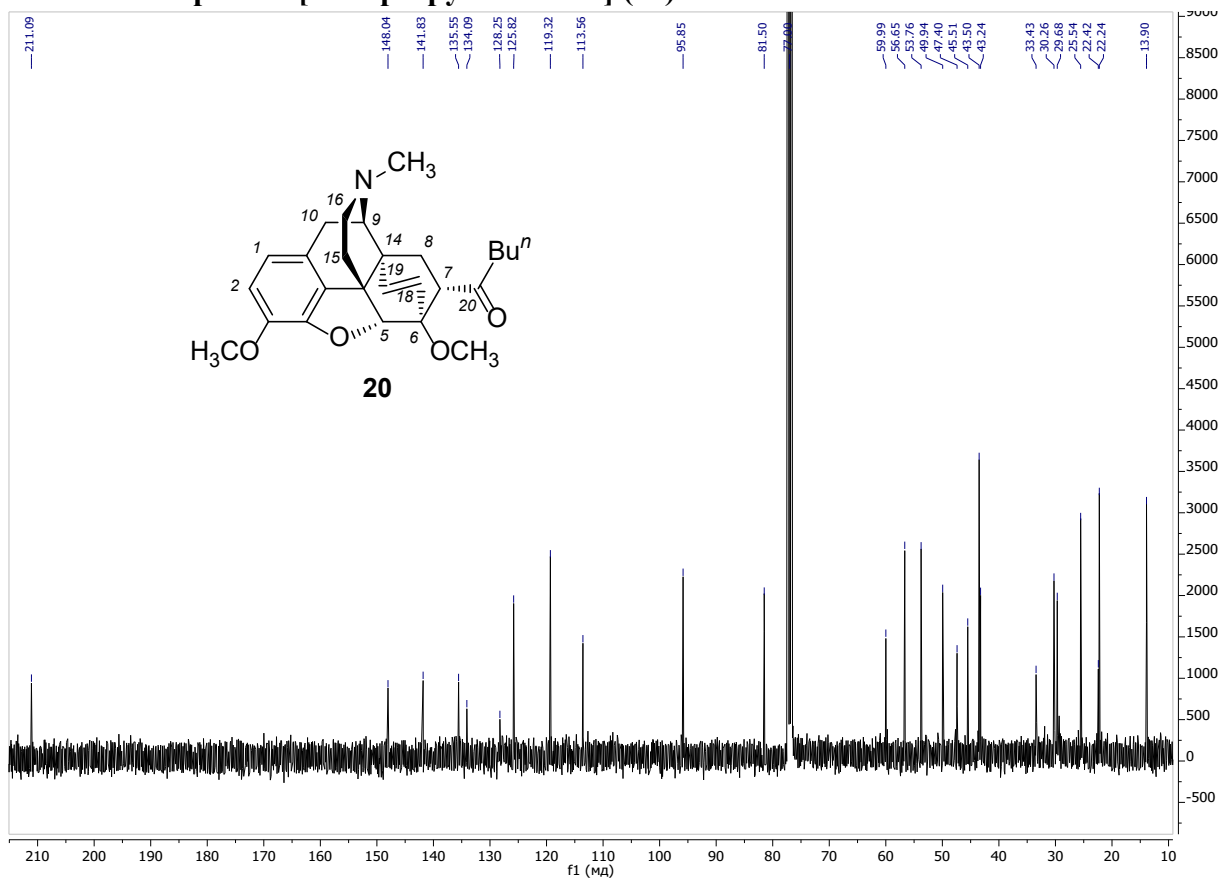

## 6. References

- [1] K. W. Bentley and D. G. Hardy, *J. Am. Chem. Soc.*, 1967, **89**, 3267.
- [2] I. V. Sandulenko, E. S. Kovaleva, A. S. Peregudov, V. N. Kalinin and S. K. Moiseev, *ChemistrySelect*, 2016, **1**, 1004.
- [3] J. Marton, S. Garadnay, Z. Szabo, S. Hosztafi and S. Makleit, *Acta Chem. Scand.*, 1998, **52**, 1234.
- [4] C. Adamo and V. Barone, *J. Chem. Phys.* 1999, **110**, 6158-6169. DOI: 10.1063/1.478522.
- [5] F. Weigend and R. Ahlrichs, *Phys. Chem. Chem. Phys.*, 2005, **7**, 3297.
- [6] O. Vahtras, J. Almlof and M.W. Feyereisen, *Chem. Phys. Lett.*, 1993, **213**, 514.
- [7] F. Neese, F. Wennmohs, U. Becker and C. Riplinger, *J. Chem. Phys.*, 2020, **152**, 224108.
- [8] (a) F. Neese, *J. Comput. Chem.*, 2003, **24**, 1740(b) F. Neese, F. Wennmohs, A. Hansen and U. Becker, *Chem. Phys.*, 2009, **356**, 98; (c) A. K. Dutta, F. Neese, and R. Izsak, *J. Chem. Phys.* 2016, **144**, 034102.
- [9] F. Weigend, *Phys. Chem. Chem. Phys.* 2006, **8**, 1057.
- [10] O.V. Dolomanov, L.J. Bourhis, R.J. Gildea, J.A.K. Howard and H. Puschmann, *J. Appl. Cryst.*, 2009, **42**, 339.
- [11] G. M. Sheldrick, *Acta Cryst.*, 2008, **A64**, 112.
- [12] G.M. Sheldrick, *Acta Cryst.*, 2015, **A71**, 3.
